# Supplementary material for: An empirical study of amide–heteroarene π-stacking interactions using reversible inhibitors of a bacterial serine hydrolase
Source: Royal Society of Chemistry journal article supplement (doi:10.1039/c9qo00342h), 2019-01-01

*Supporting Information For:*

## **An Empirical Study of Amide–Heteroarene $\pi$ -Stacking Interactions Using Reversible Inhibitors of a Bacterial Serine Hydrolase**

Kyle DeFrees,<sup>a</sup> M. Trent Kemp,<sup>b</sup> Xochina ElHilali-Pollard,<sup>a</sup> Xiujun Zhang,<sup>b</sup> Ahmed Mohamed,<sup>a</sup> Yu Chen<sup>b</sup> and Adam R. Renslo<sup>\*a</sup>

<sup>a</sup>Department of Pharmaceutical Chemistry, University of California San Francisco, 600 16th St., San Francisco, California 94158, United States

<sup>b</sup>Department of Molecular Medicine, University of South Florida College of Medicine, 12901 Bruce B. Downs Blvd, MDC 3522, Tampa, Florida 33612, United States

\*Corresponding author: Adam R. Renslo, [adam.renslo@ucsf.edu](mailto:adam.renslo@ucsf.edu)

### **Table of Contents**

|                             |    |
|-----------------------------|----|
| Supplementary Figures ..... | 2  |
| Biochemical Data.....       | 3  |
| SPR Data .....              | 7  |
| Crystallographic Data ..... | 17 |
| Dipole Calculations.....    | 18 |
| Synthetic Procedures.....   | 20 |
| HRMS Spectra.....           | 41 |

## Supplementary Figures

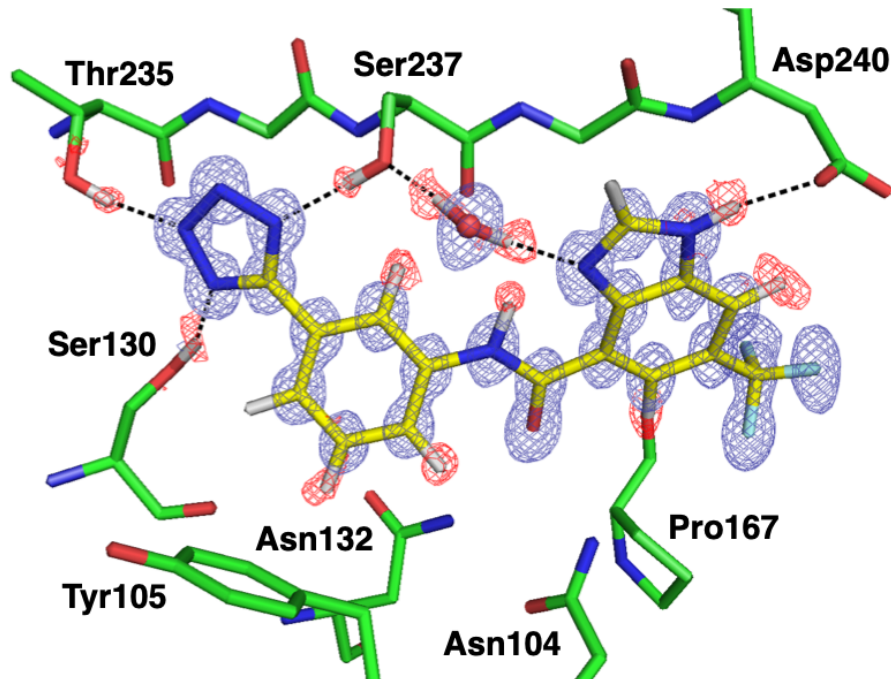

**Supplementary Figure 1.** Compound **1** in complex with CTX-M-14 at 0.89Å. 2Fo-Fc (blue): 1.5  $\sigma$ ; Fo-Fc (red): 2.5  $\sigma$  (H-omit). Compound previously reported in references 16 and 17 of the main text; PDB: 4UA7.

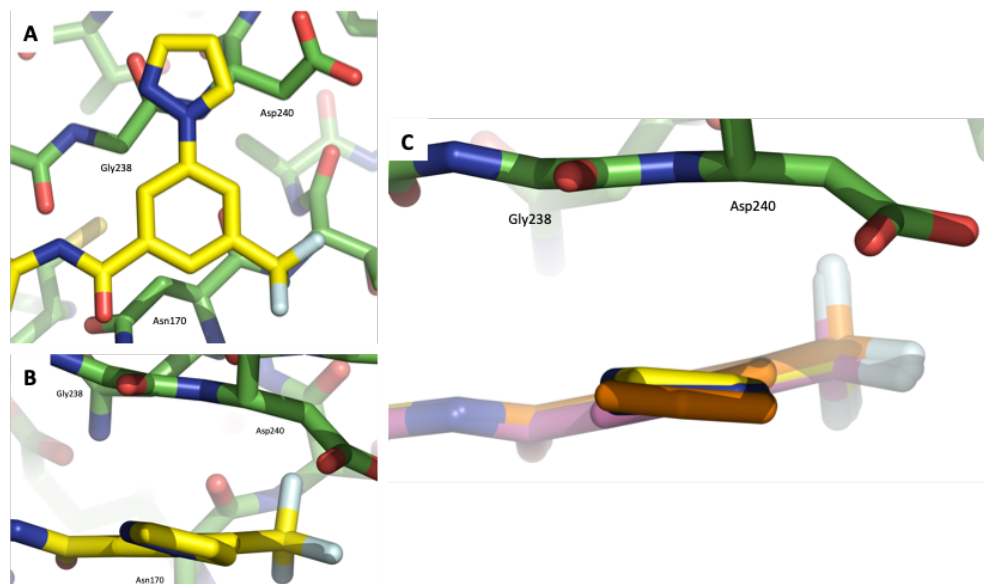

**Supplementary Figure 2.** Front (A) and top (B) view of compound **14** with CTX-M-14. C) Superimposed top view of **3**, **14**, and **20** with CTX-M-14.

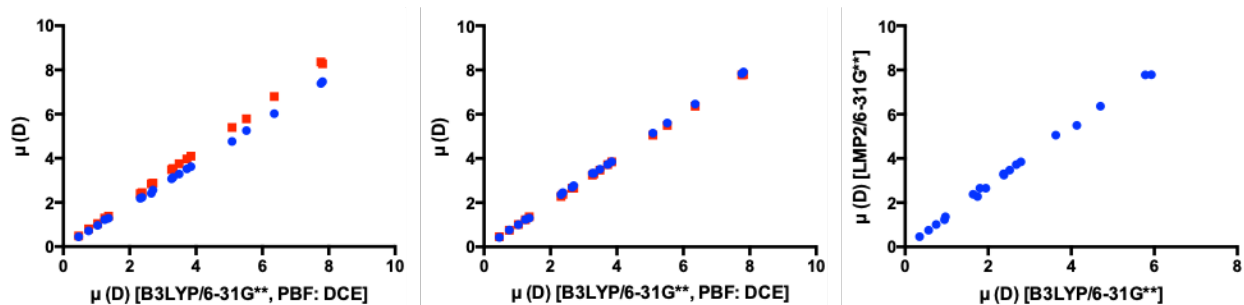

**Supplementary Figure 3.** Comparison of calculated dipoles between solvents and models. A) B3LYP/6-31G\*\*, PBF: DCE (10.65  $\epsilon$ ) vs. PBF: H<sub>2</sub>O (blue, 80.37  $\epsilon$ ) and PBF: CHCl<sub>3</sub> (red, 4.806  $\epsilon$ ). B) B3LYP/6-31G\*\*, PBF: DCE vs. M06-2X/6-31G\*\*, PBF: DCE (blue) and B3LYP-D3/6-31G\*\*, PBF: DCE (red). C) B3LYP/6-31G\*\*, gas phase vs. LMP2/6-31G\*\*, gas phase.

## Biochemical Data

Each curve is a replicate generated from a technical triplicate. Compounds were tested up to 2.5 mM or 500  $\mu$ M for CTX-M-14 and CTX-M-27, respectively (as solubility allowed).

### K<sub>m</sub> Measurements:

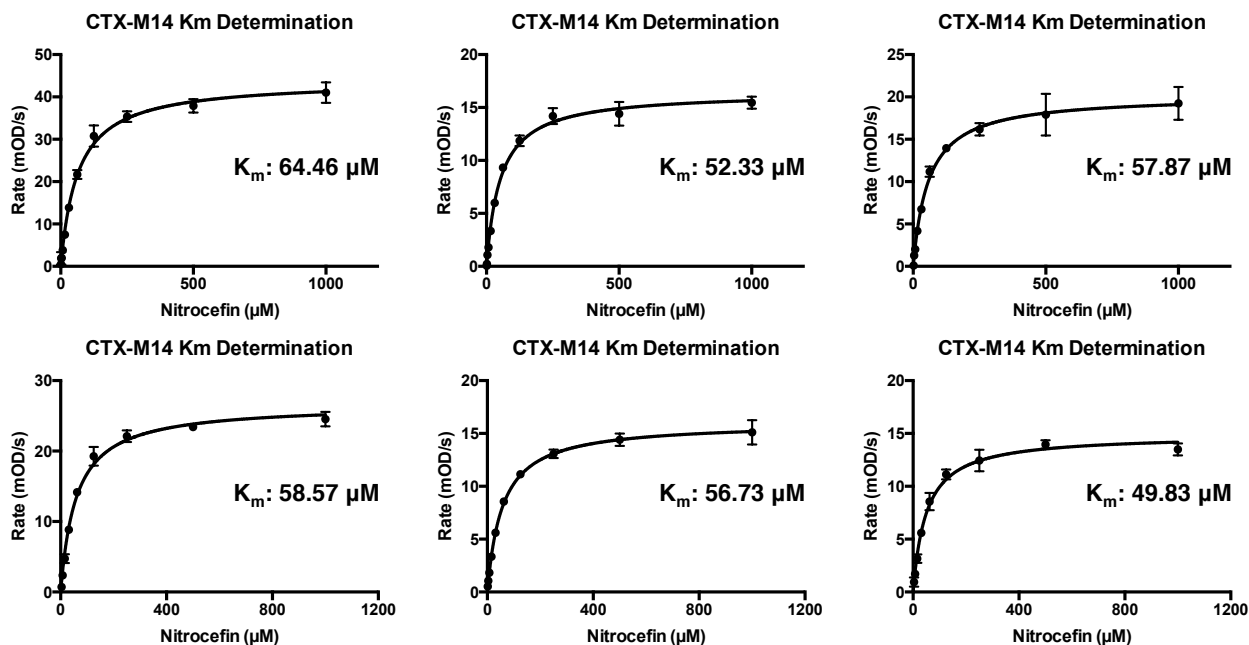

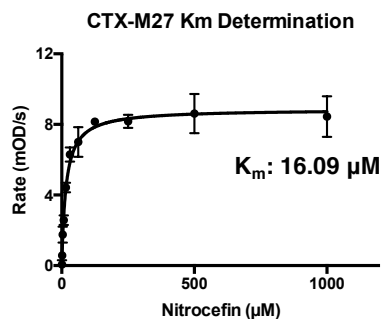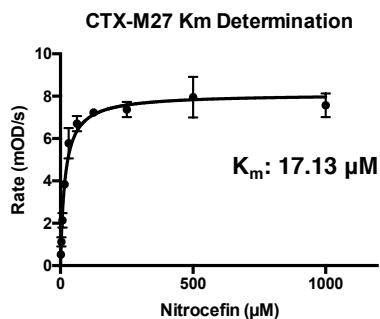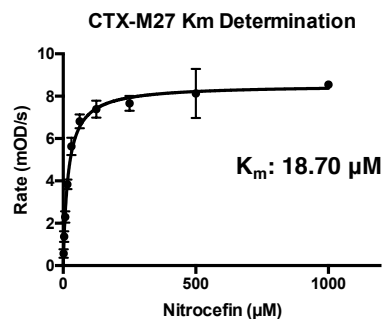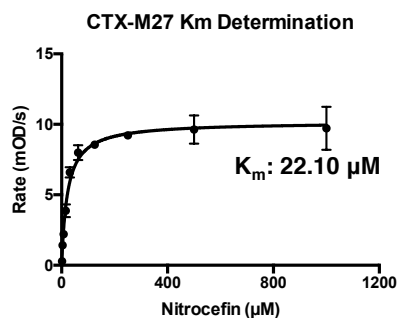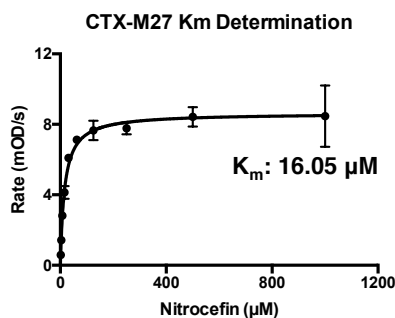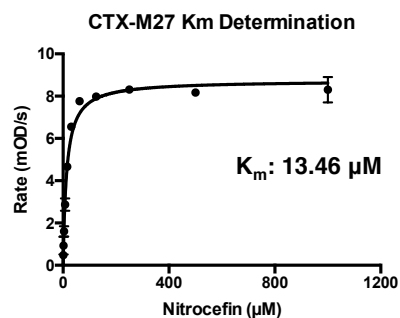

## CTX-M-14 Biochemical Data:

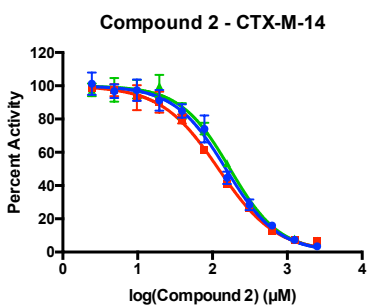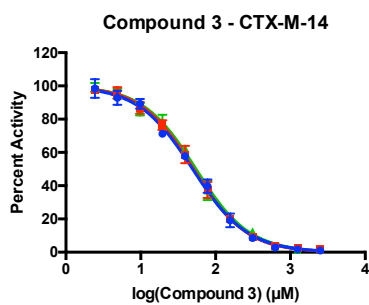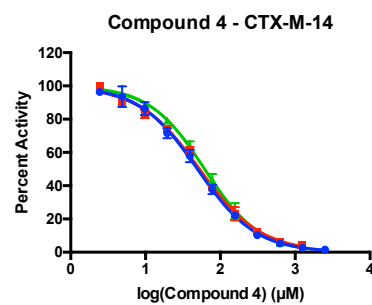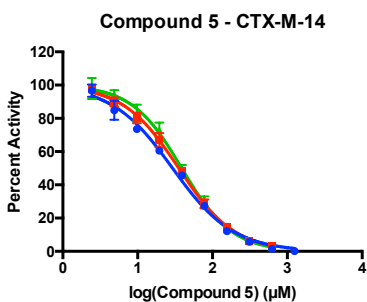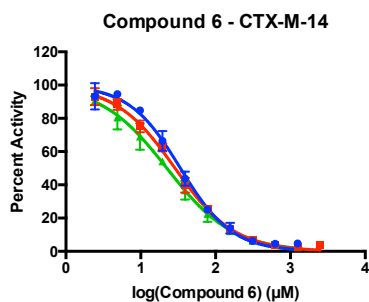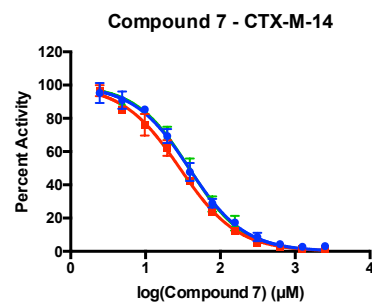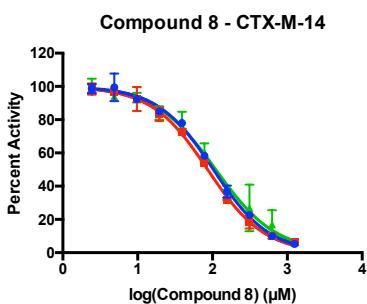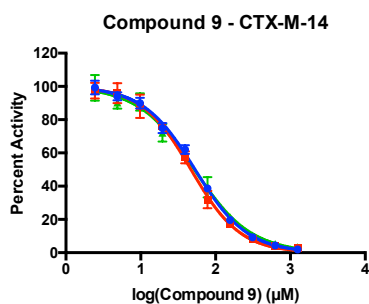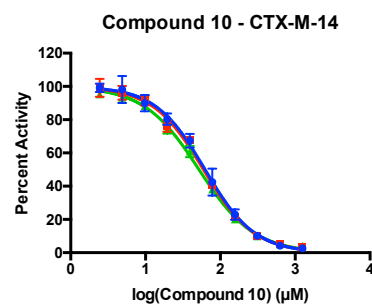



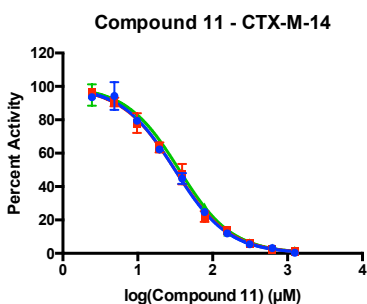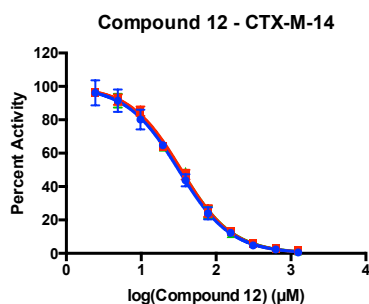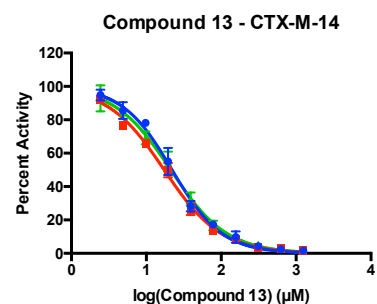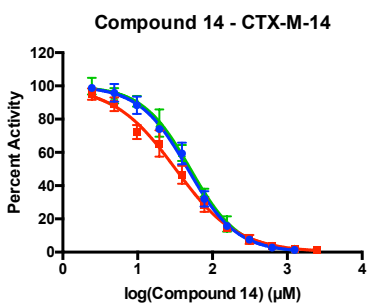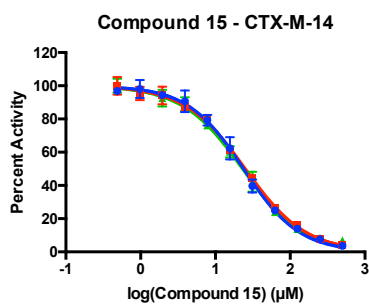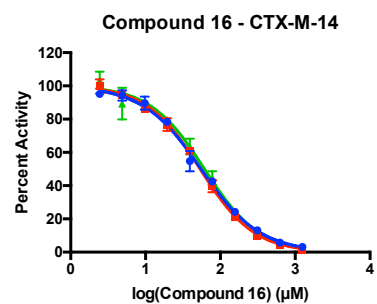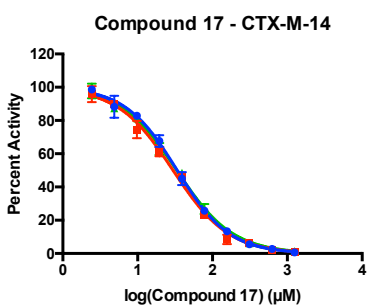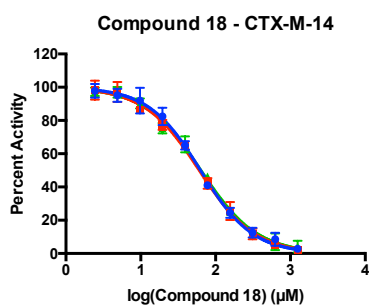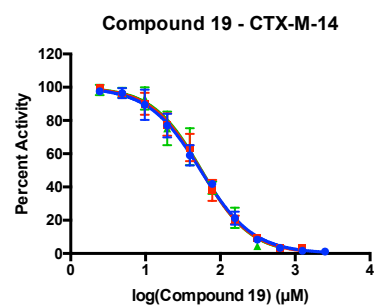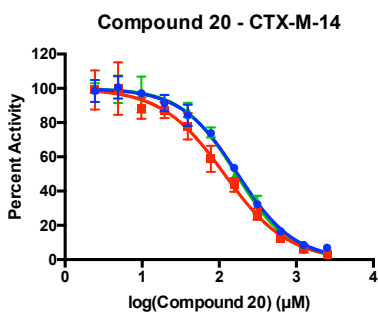

## CTX-M-27 Biochemical Data:

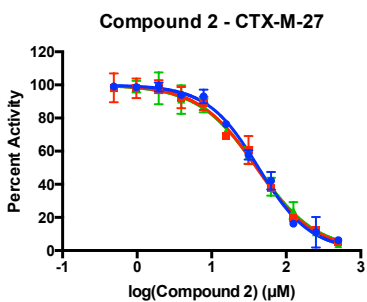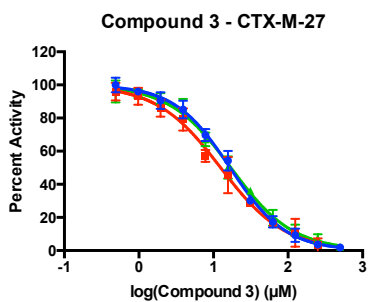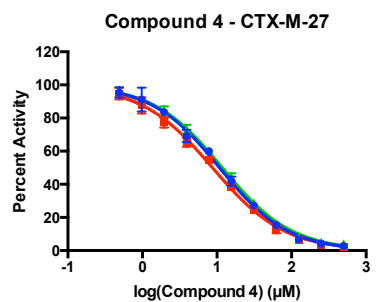

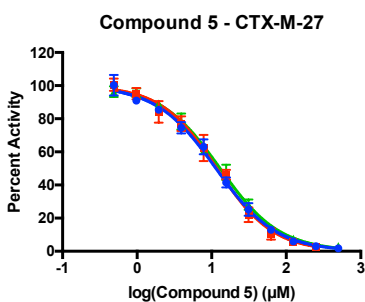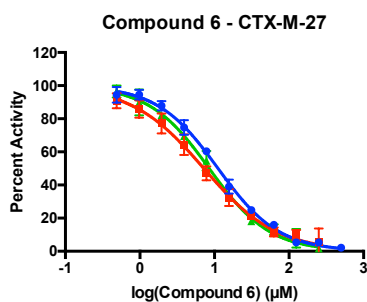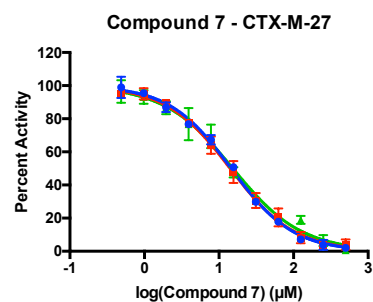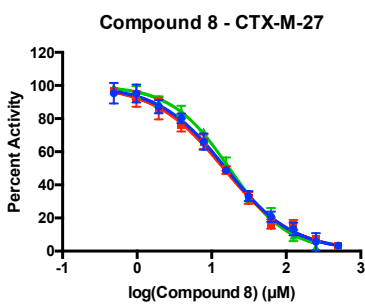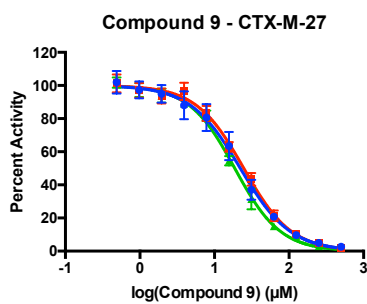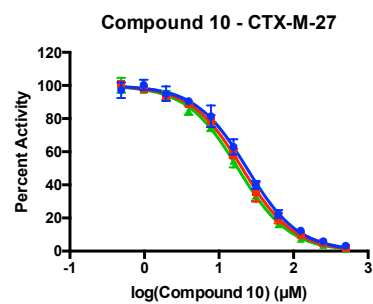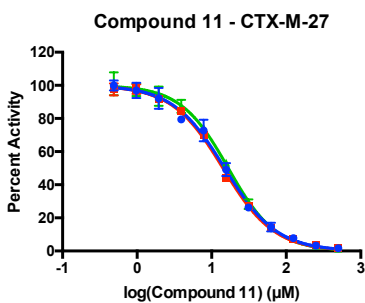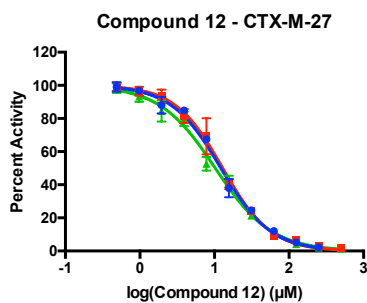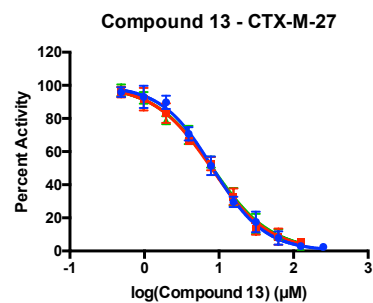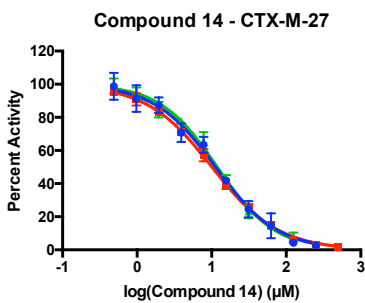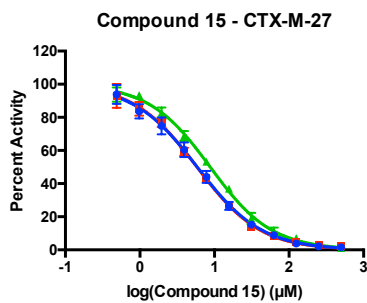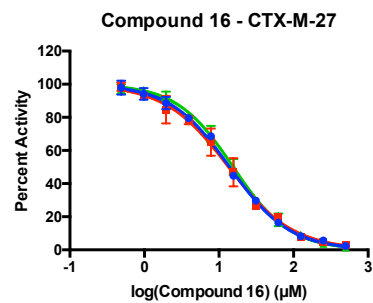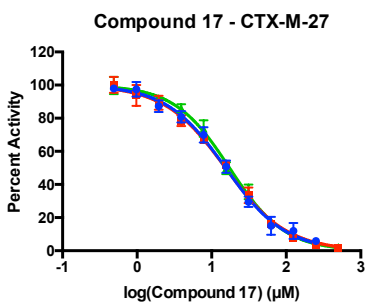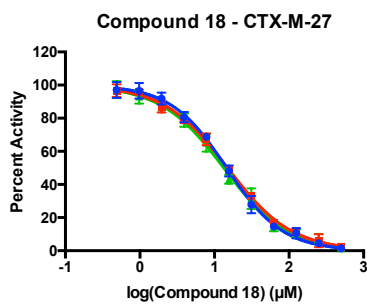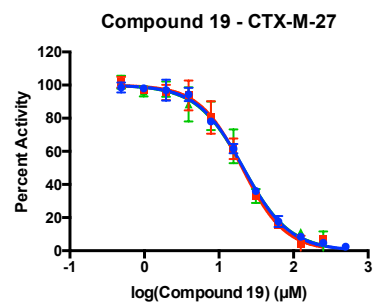

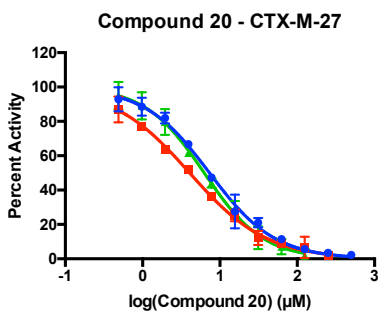

## SPR Data

Compounds were tested in 10-point dose response with two internal blanks up to 500  $\mu\text{M}$  and 50  $\mu\text{M}$  for CTX-M-14 and CTX-M-27, respectively (as solubility allowed). All compounds were tested in quadruplicate for CTX-M-14 and in duplicate for CTX-M-27.  $K_d$  was measured at equilibrium binding between 65-85s.

### Representative sensograms for CTX-M-14:

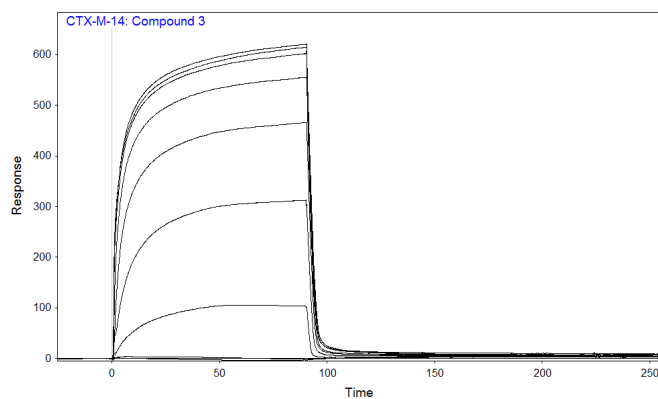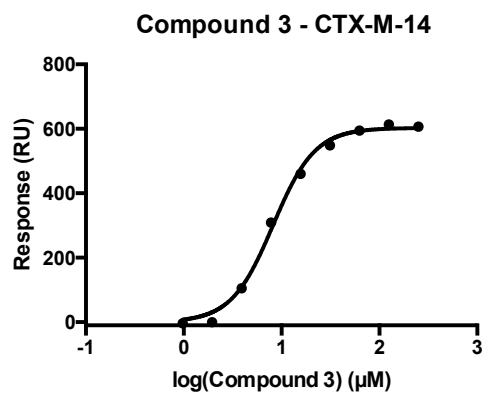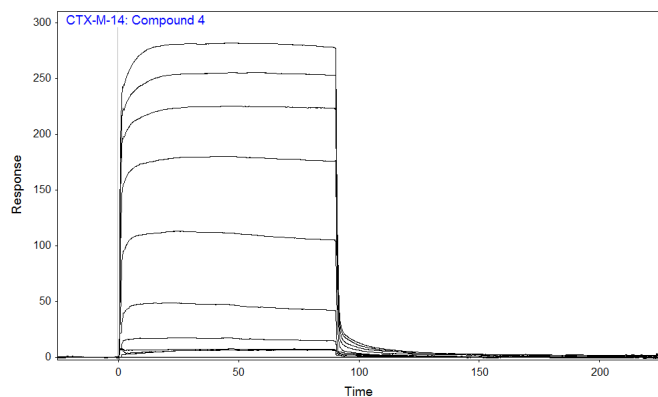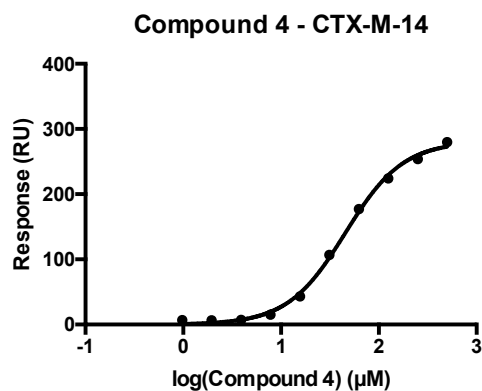

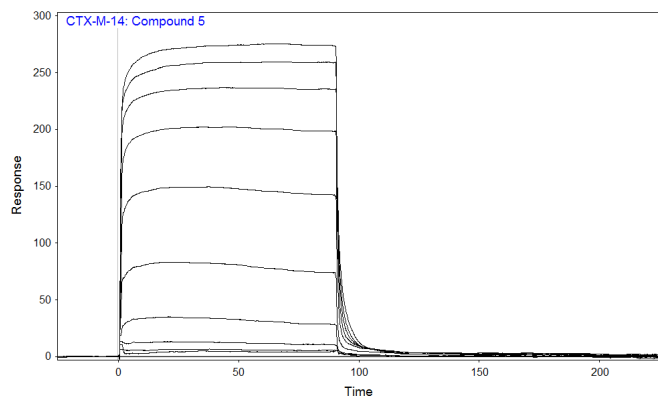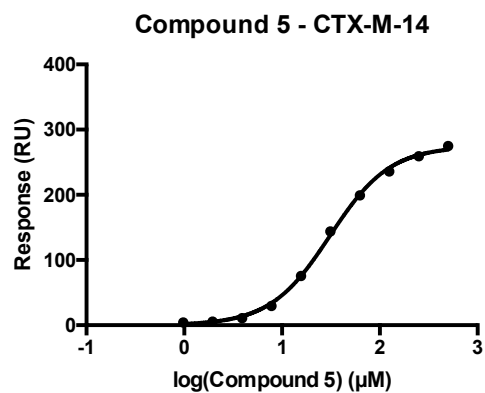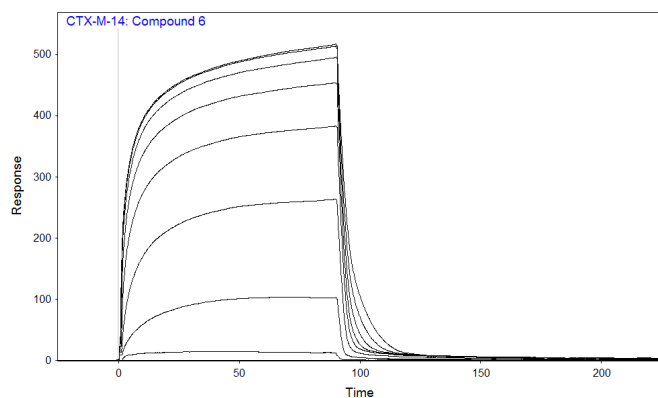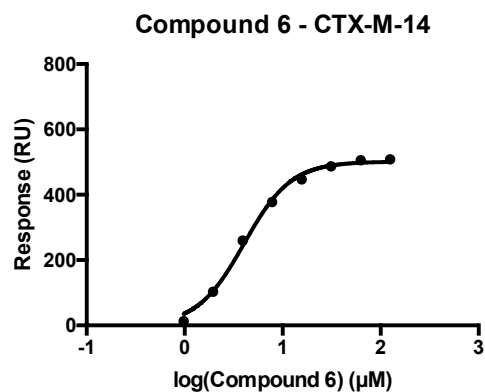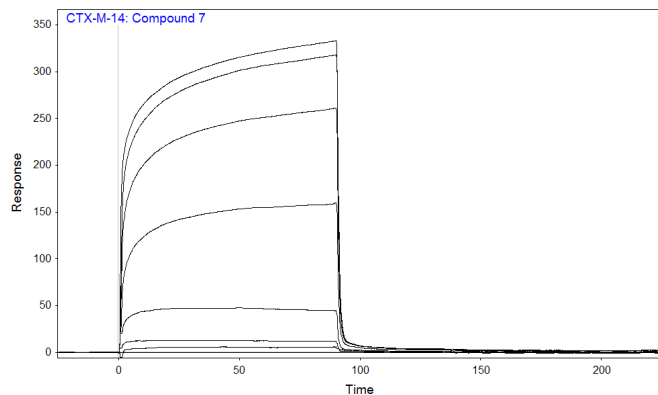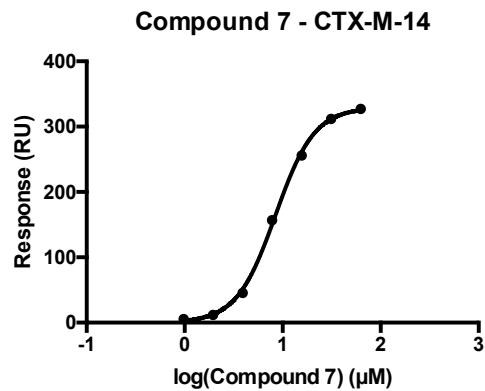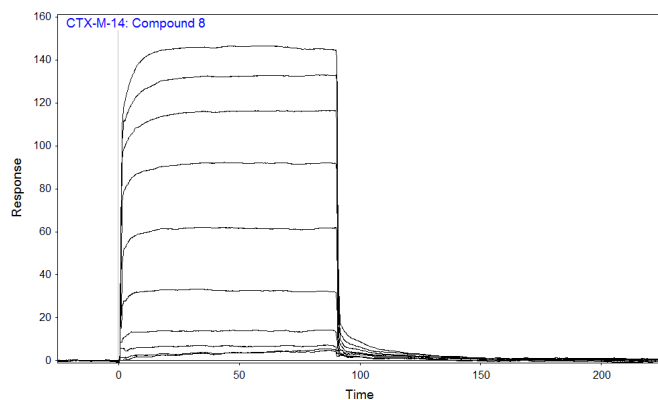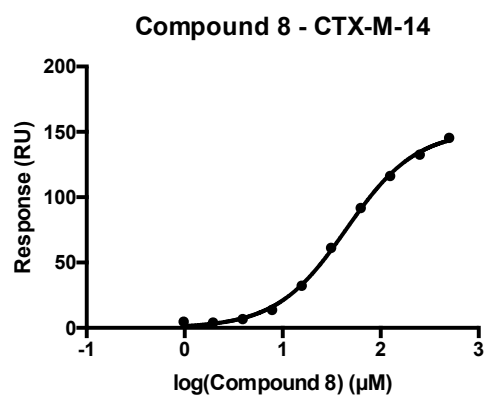

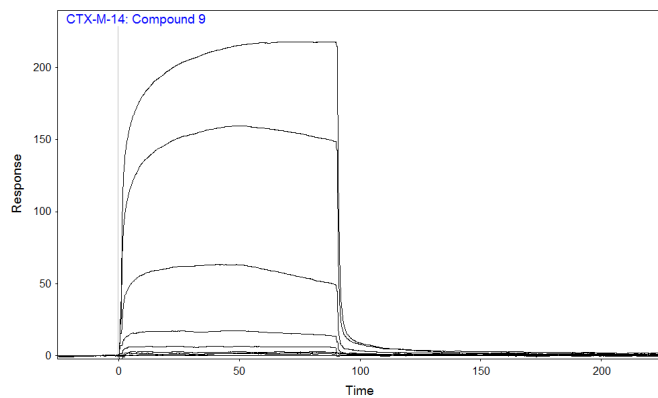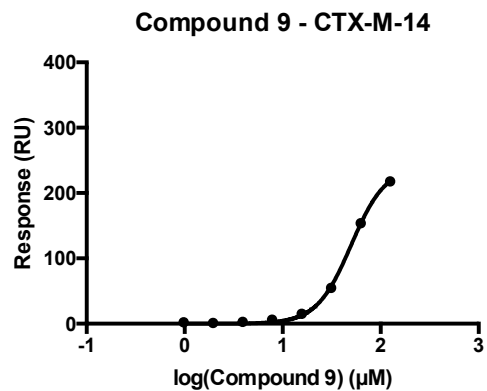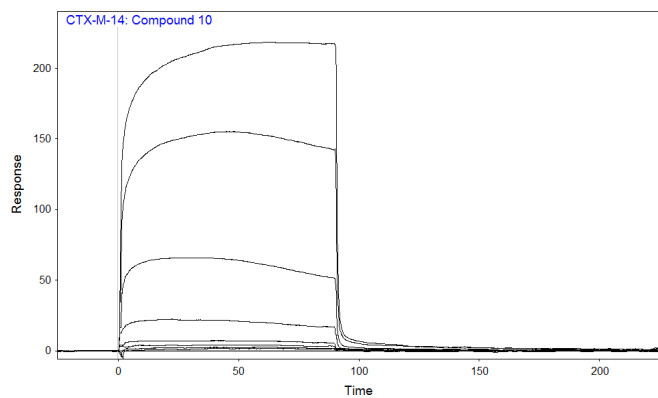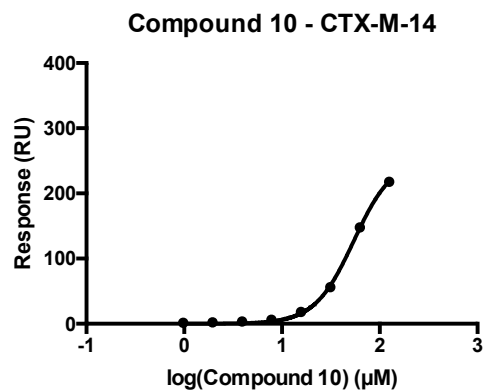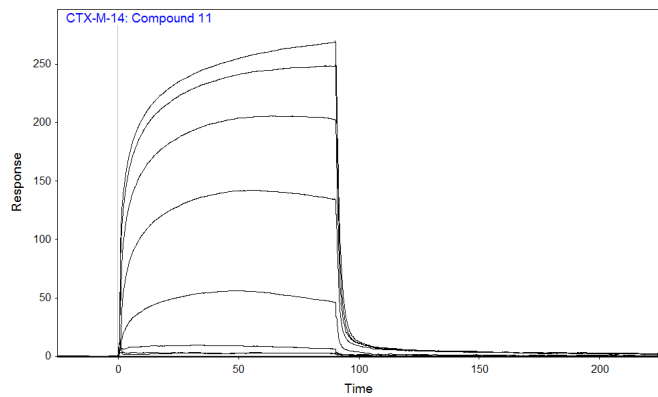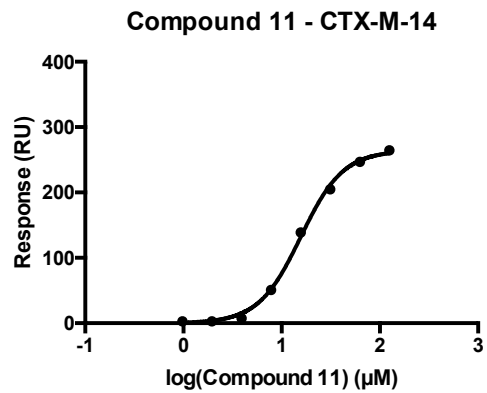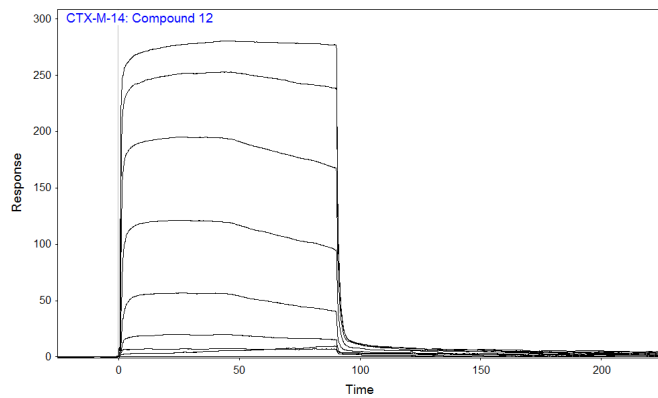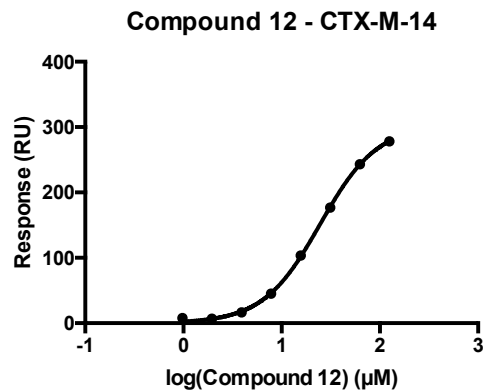

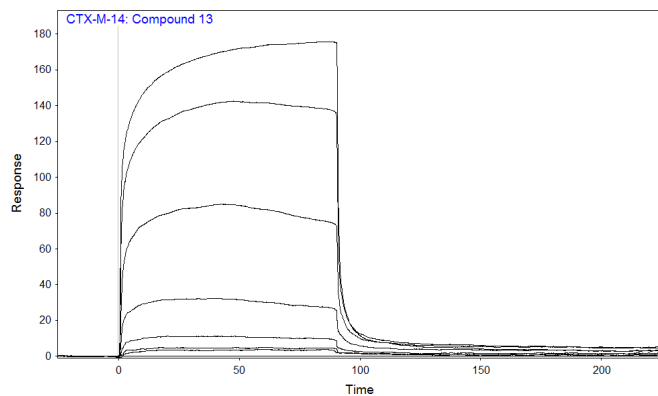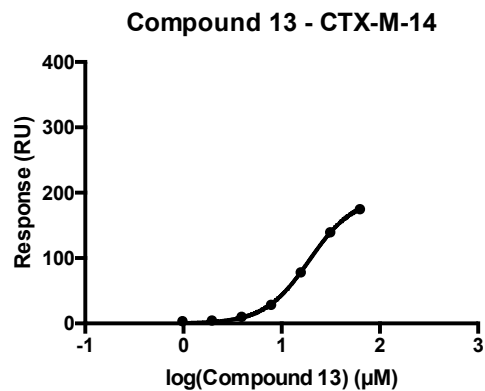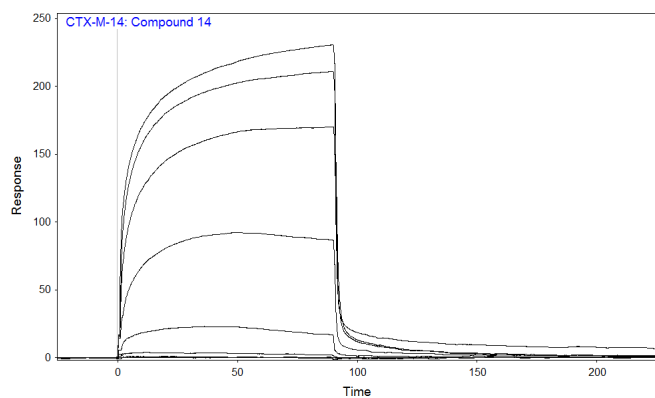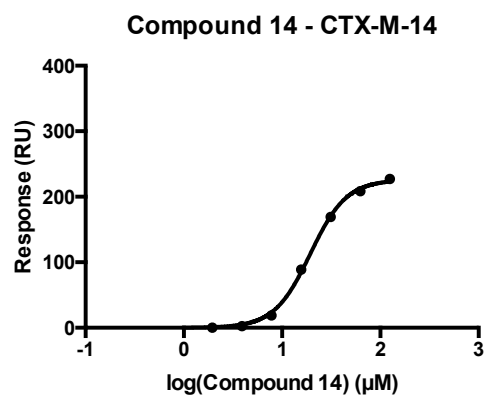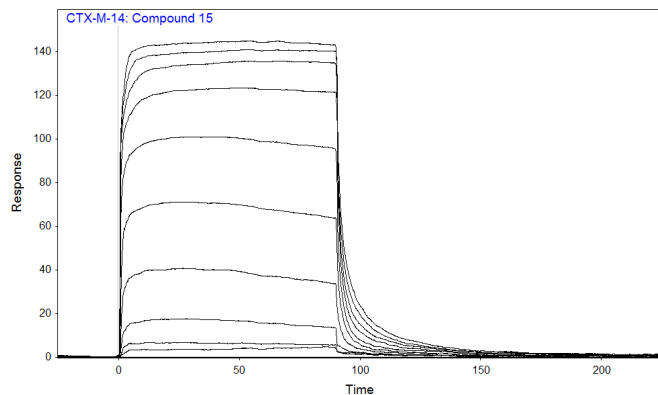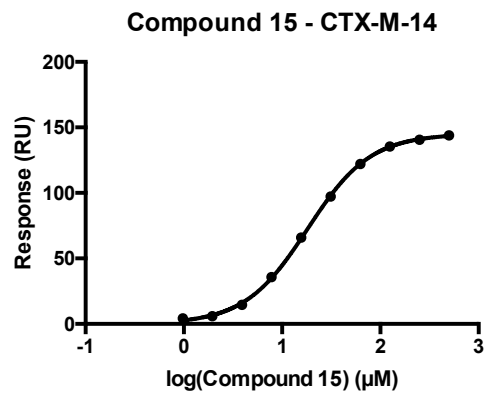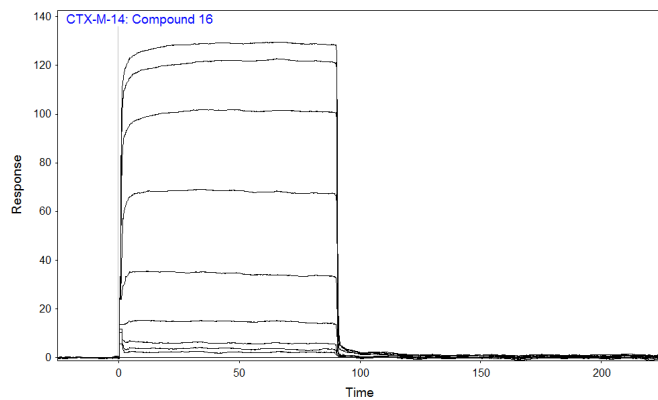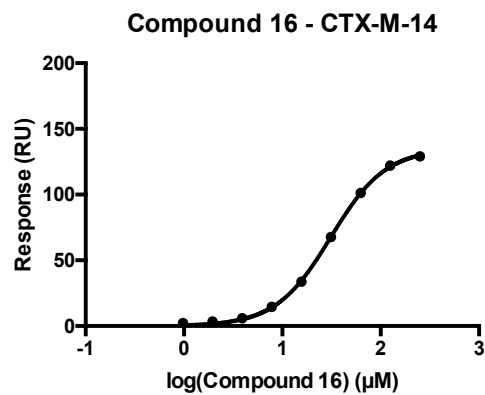

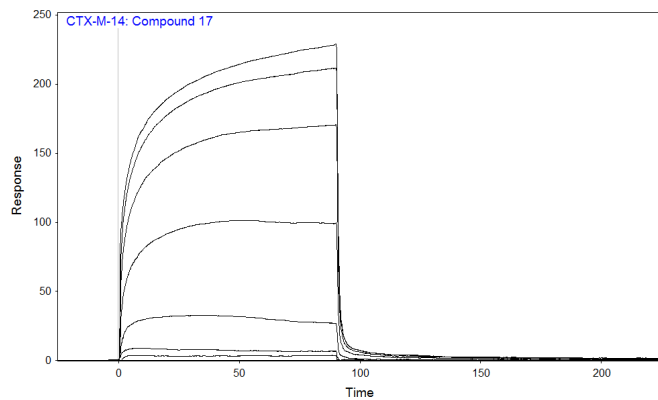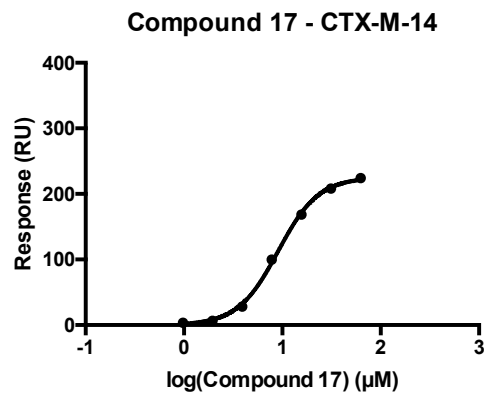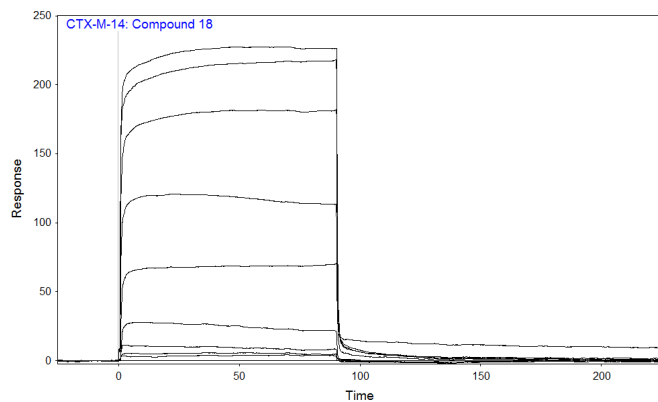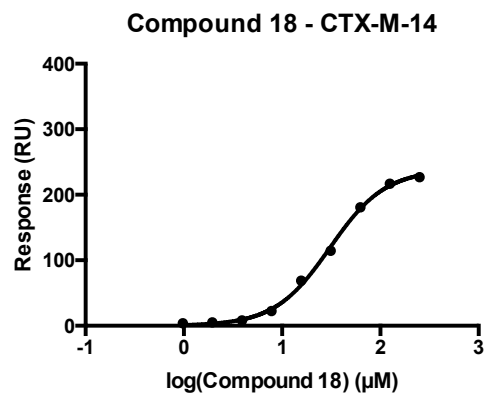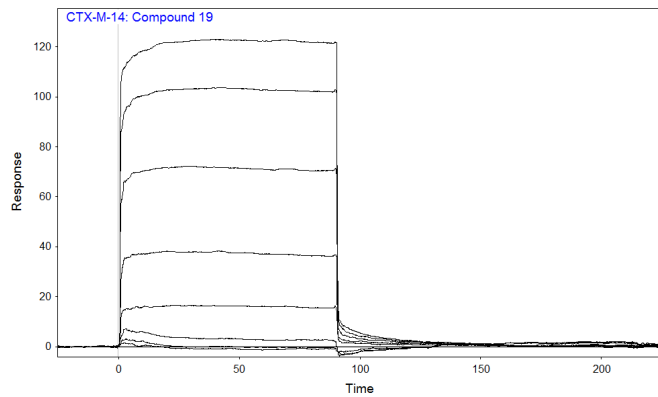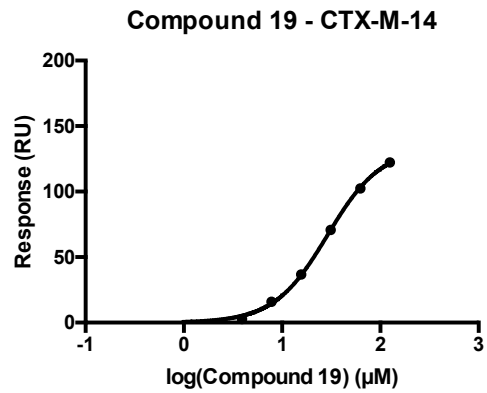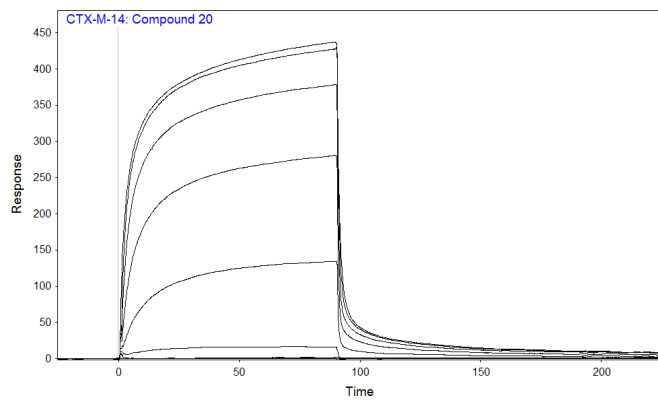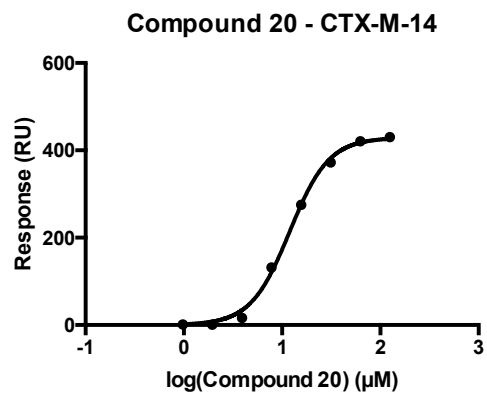

## Representative sensograms for CTX-M-27:

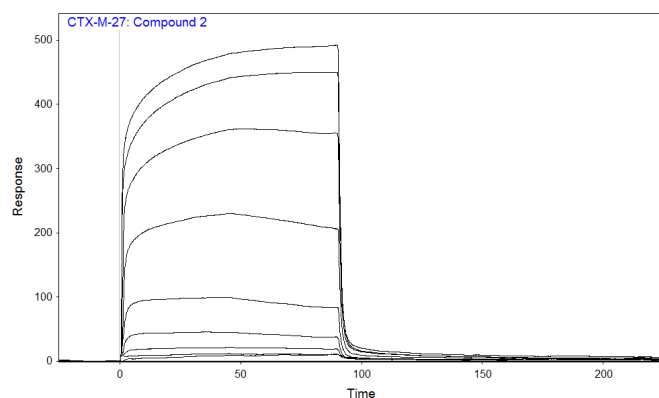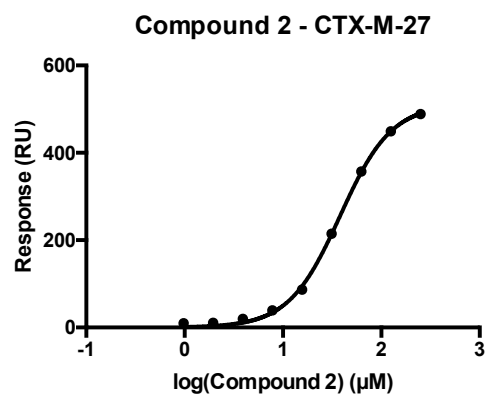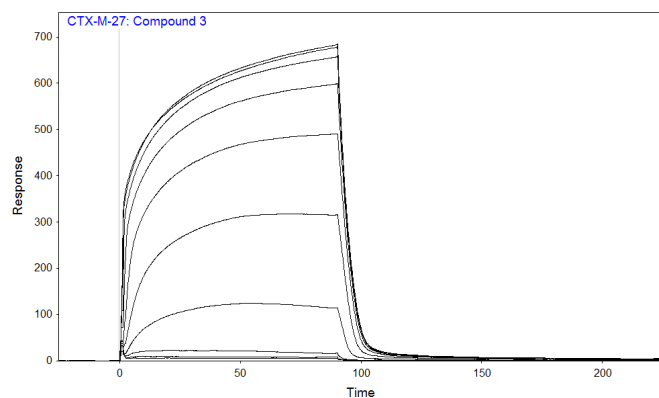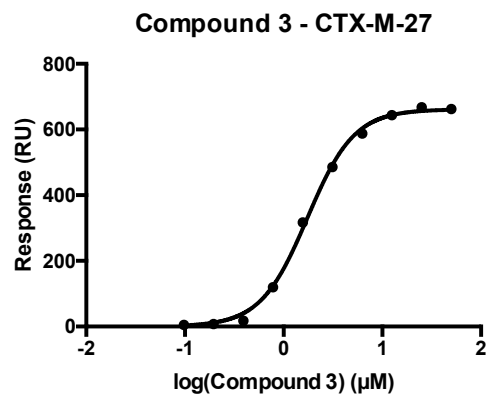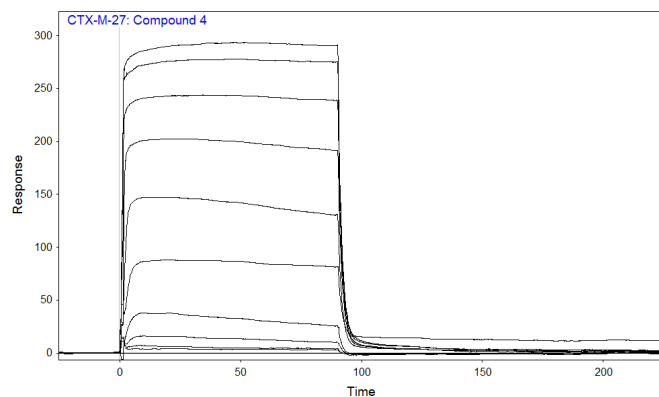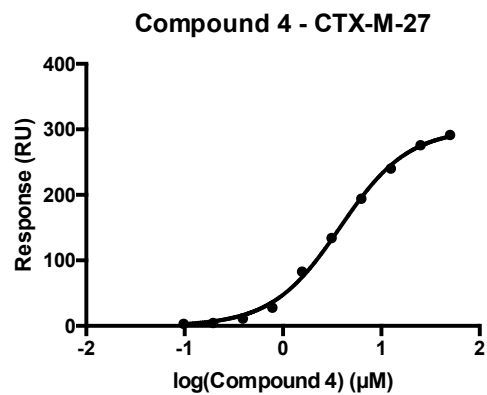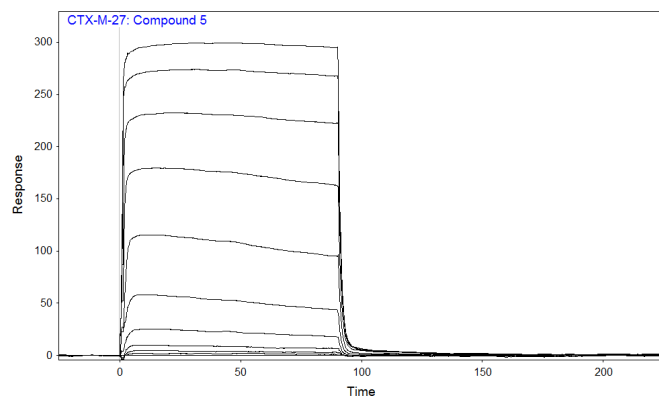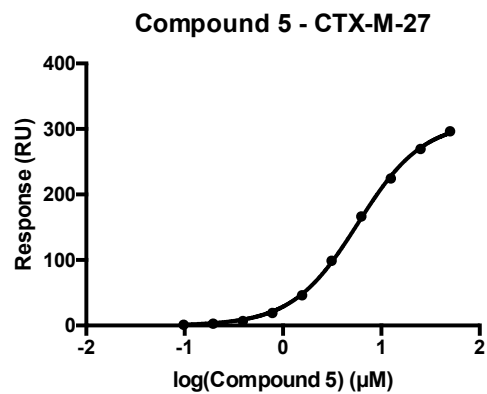



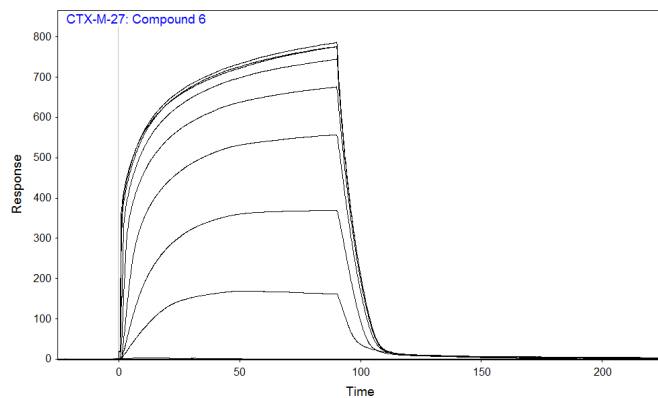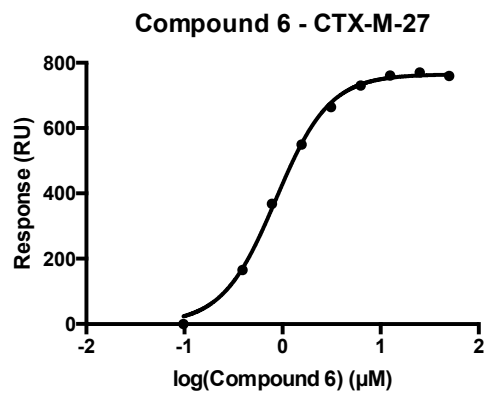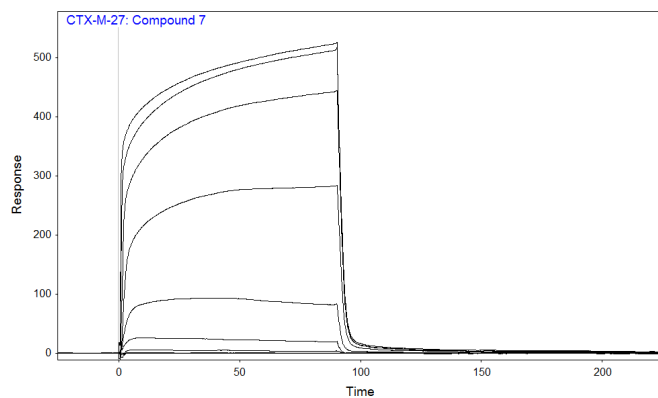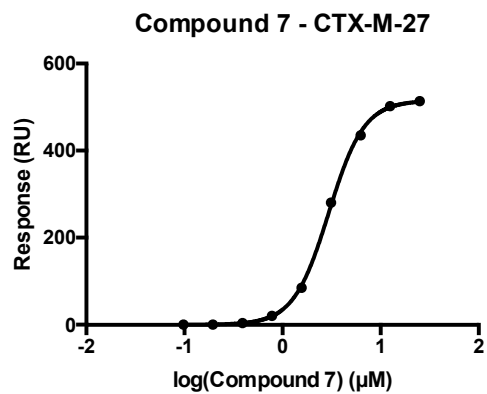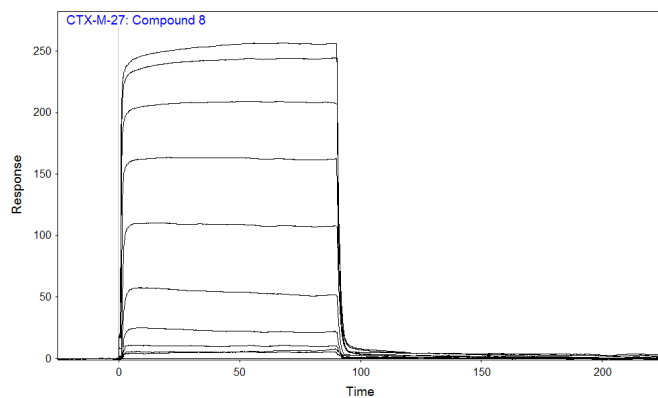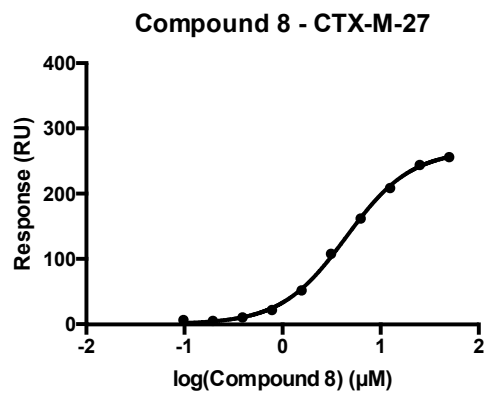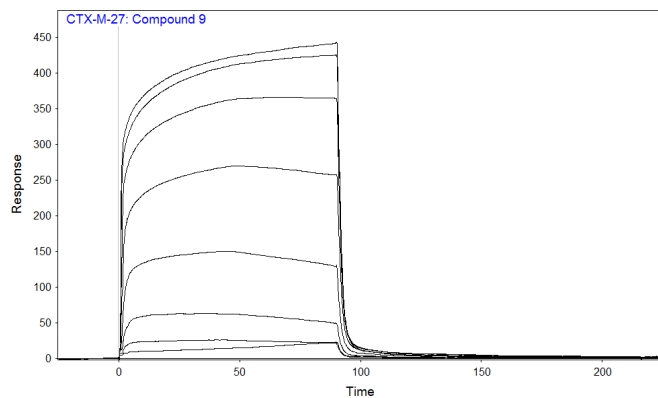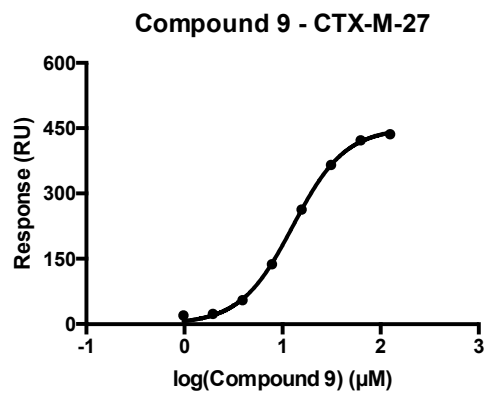

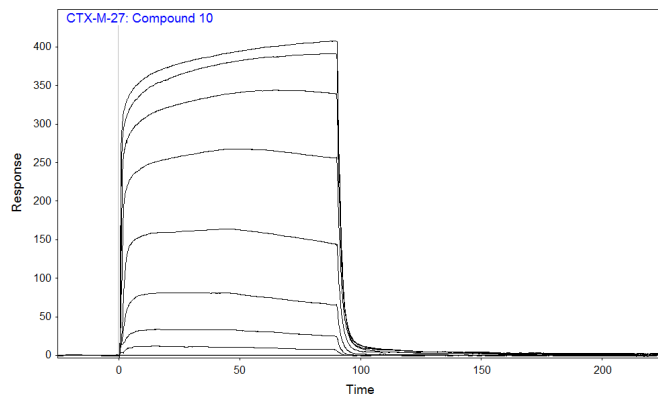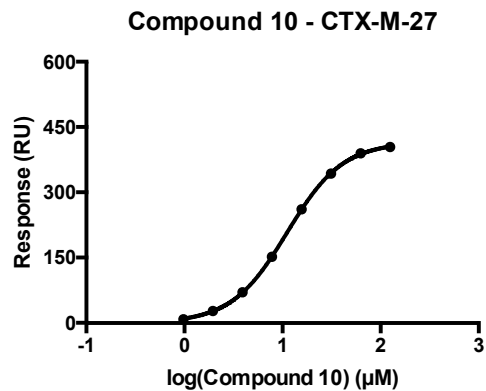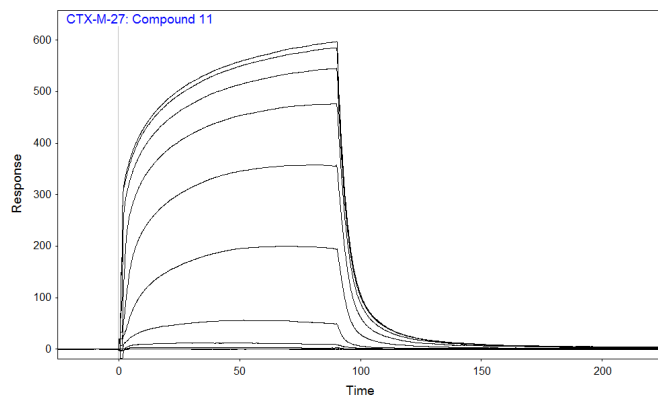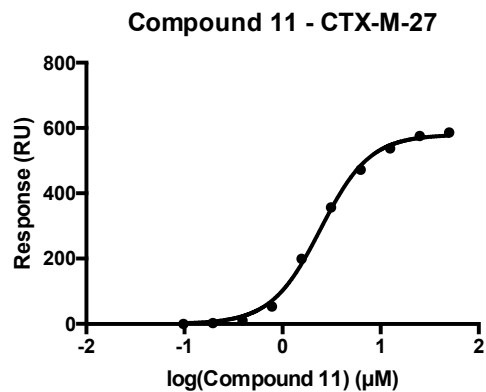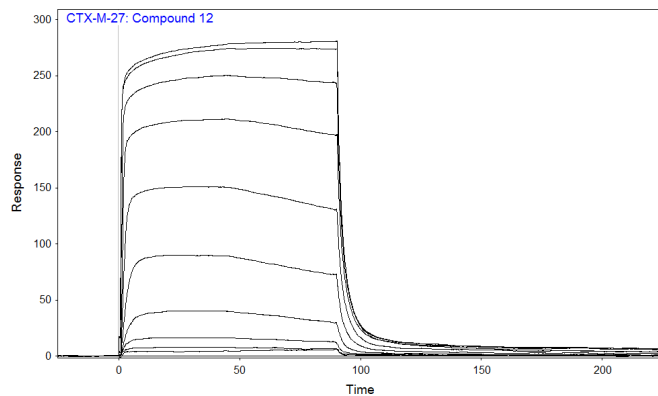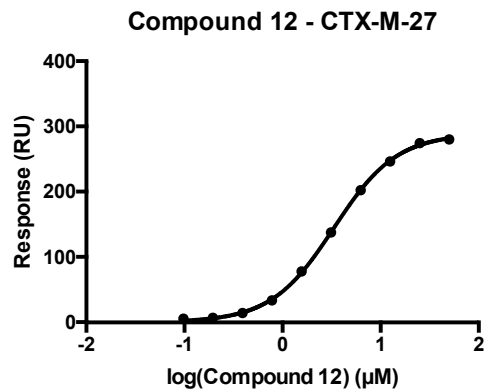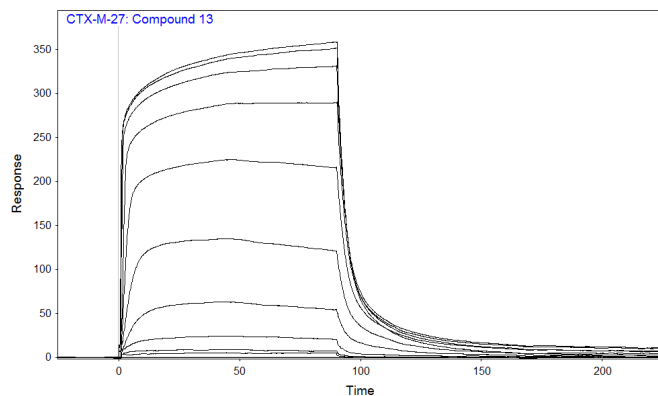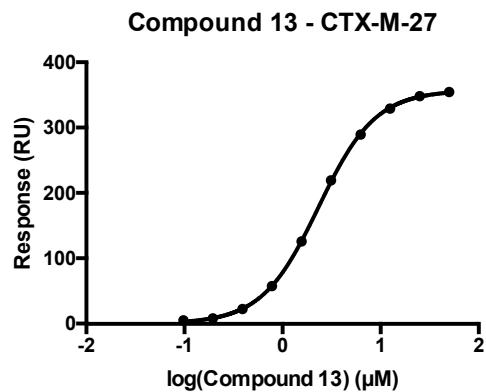

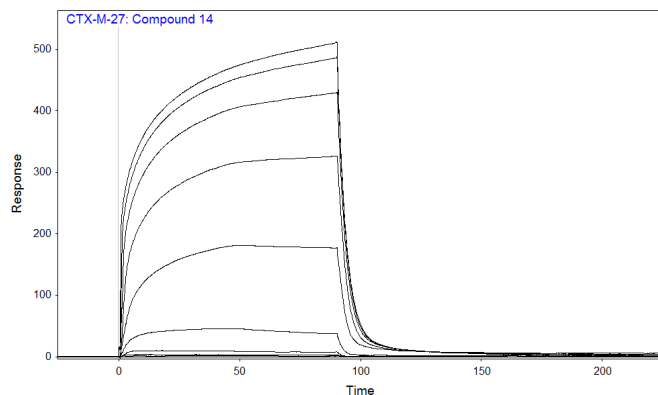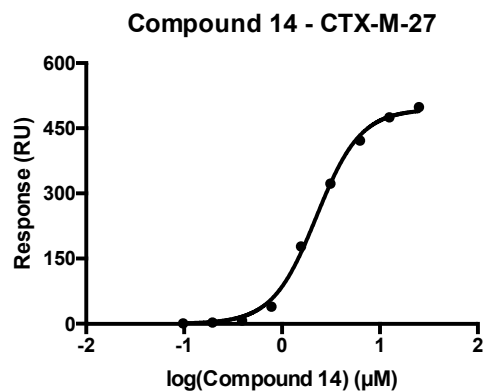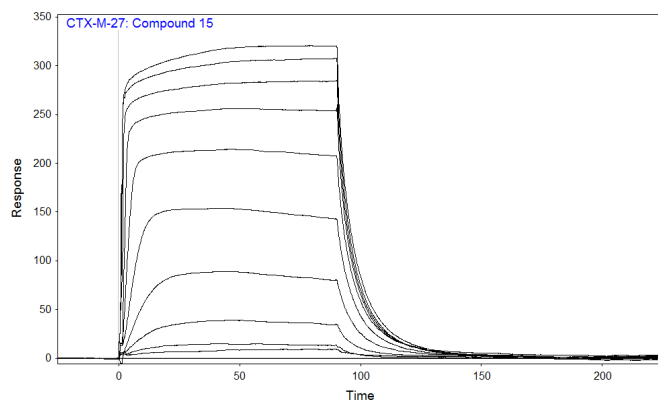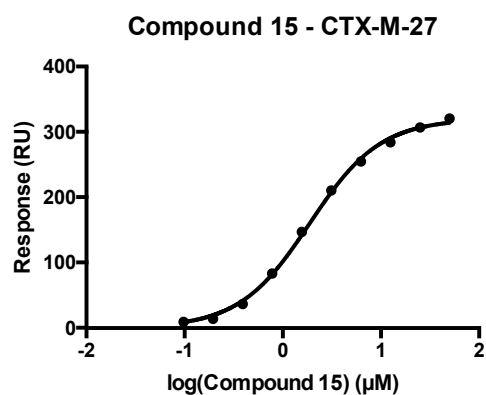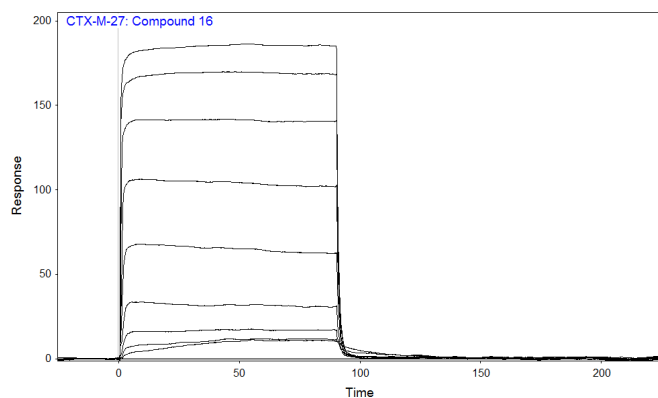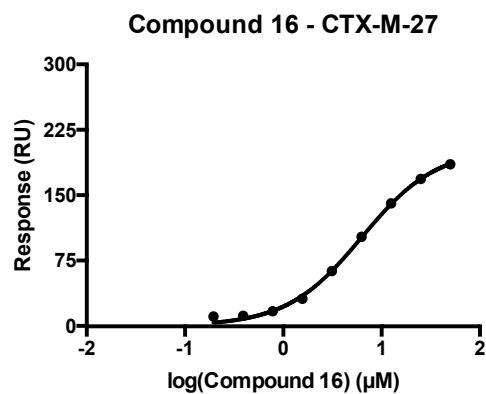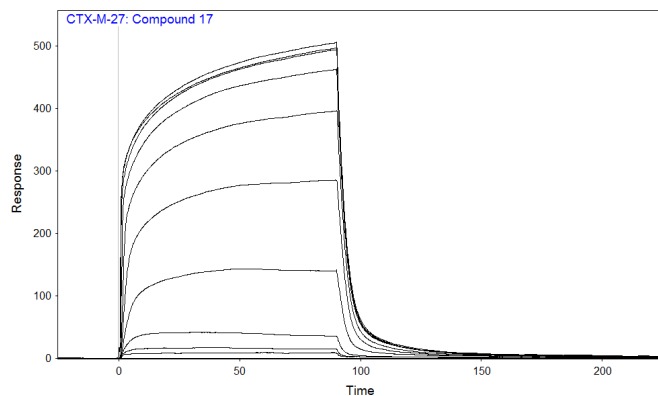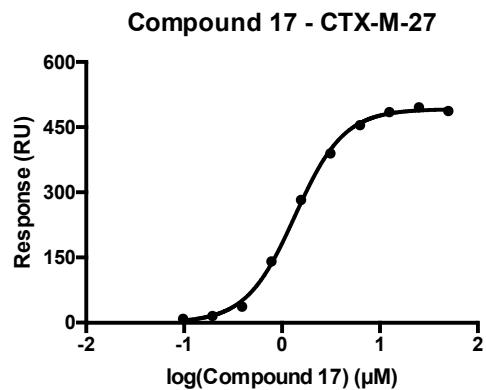

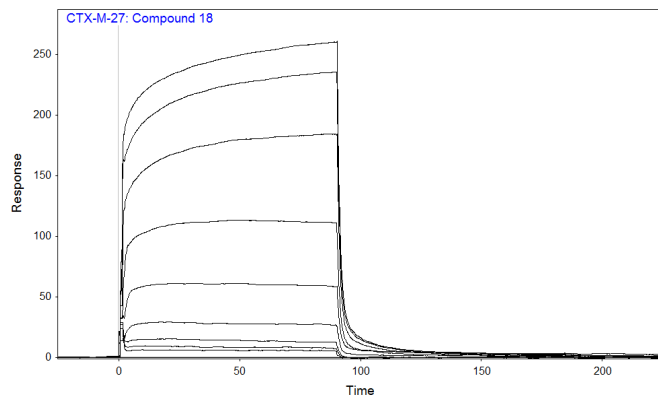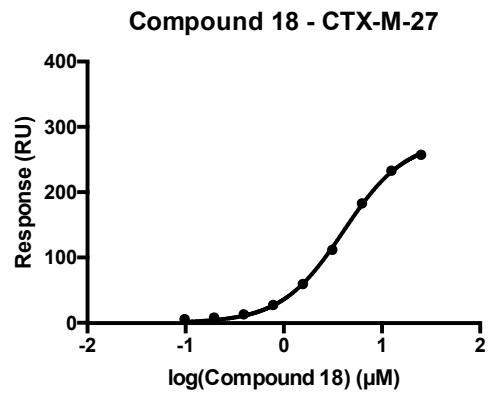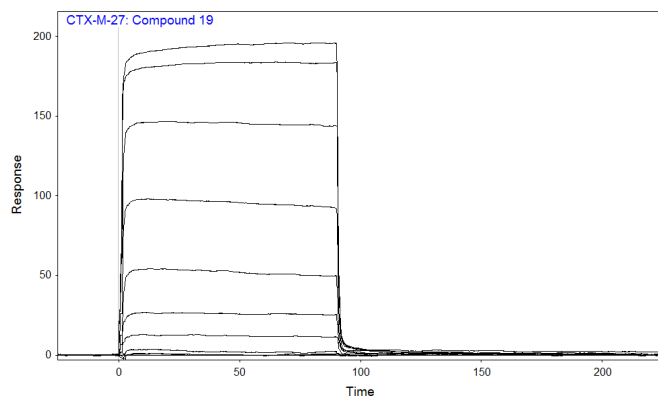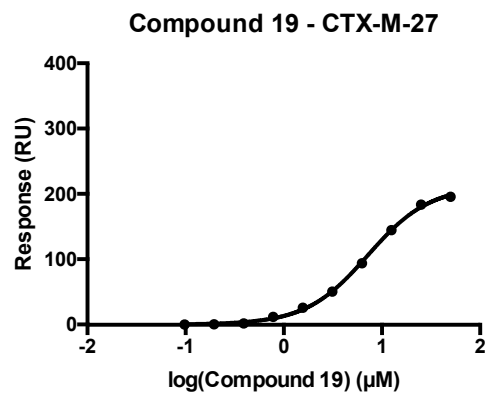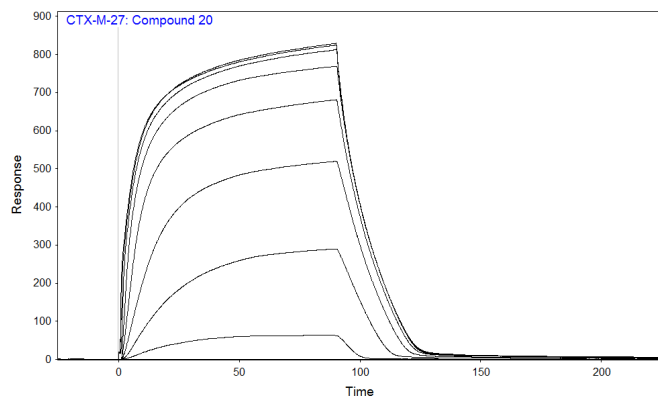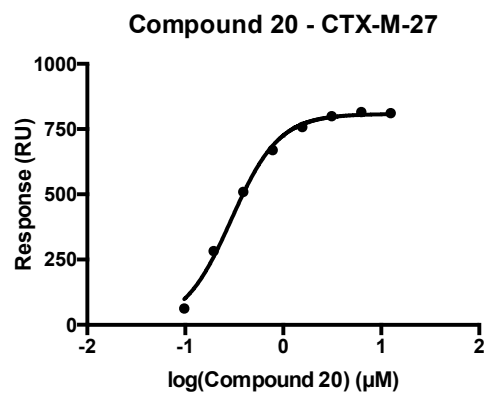

## Crystallographic Data

Supplementary Table 1. X-ray Data Collection and Refinement Statistics

| <b><u>Data Collection</u></b>            |              |             |             |               |             |
|------------------------------------------|--------------|-------------|-------------|---------------|-------------|
| Structure (PDB ID)                       | <u>6OOF</u>  | <u>6OOE</u> | <u>6OOJ</u> | <u>6OOH</u>   | <u>6OOK</u> |
| Space Group                              | P 1 21 1     | P 1 21 1    | P 1 21 1    | P 1 21 1      | P 1 21 1    |
| Cell Dimensions                          |              |             |             |               |             |
| <i>a</i> , <i>b</i> , <i>c</i> (Å)       | 45.161       | 45.323      | 45.096      | 45.129        | 45.003      |
|                                          | 107.211      | 107.482     | 106.929     | 107.157       | 106.725     |
|                                          | 47.884       | 48.057      | 47.83       | 47.92         | 47.736      |
| $\alpha$ , $\beta$ , $\gamma$ (°)        | 90           | 90          | 90          | 90            | 90          |
|                                          | 101.656      | 101.715     | 101.611     | 101.906       | 101.73      |
|                                          | 90           | 90          | 90          | 90            | 90          |
| Resolution (Å)                           | 35.3 - 1.236 | 30 - 1.26   | 25.71 - 1.4 | 29.92 - 1.499 | 25.27 - 1.4 |
| No. Reflections                          | 111033       | 107 923     | 86936       | 70775         | 82095       |
| R <sub>merge</sub> (%)                   | 10.3         | 10.6        | 5.0         | 6.6           | 2.7         |
| <i>I</i> / $\sigma$ <i>I</i>             | 22.36(2.15)  | 25.16(2.69) | 26.52(3.9)  | 16.81(2.8)    | 44.04(8.02) |
| Completeness (%)                         | 87.8         | 89.2        | 99.9        | 99.4          | 94.8        |
| Redundancy                               | 4.2(3.9)     | 5.7(5.8)    | 3.7(2.9)    | 3.2(2.8)      | 3.6(2.9)    |
| <b><u>Refinement</u></b>                 |              |             |             |               |             |
| Resolution (Å)                           | 35.3 - 1.236 | 30 - 1.26   | 25.71 - 1.4 | 29.92 - 1.499 | 25.27 - 1.4 |
| R <sub>work</sub> /R <sub>free</sub> (%) | 17.20/20.13  | 14.5/16.95  | 14.53/16.29 | 14.43/17.14   | 12.03/15.39 |
| <b>No. Heavy Atoms</b>                   |              |             |             |               |             |
| Protein                                  | 4988         | 4206        | 4121        | 4131          | 4136        |
| Ligand/Ion                               | 116          | 116         | 145         | 145           | 125         |
| Water                                    | 691          | 729         | 738         | 787           | 697         |
| <b><i>B</i>-Factors (Å<sup>2</sup>)</b>  |              |             |             |               |             |
| Protein                                  | 14.00        | 12.10       | 15.84       | 15.14         | 15.72       |
| Ligand/Ion                               | 16.12        | 14.73       | 18.57       | 18.37         | 29.83       |
| Water                                    | 26.43        | 25.92       | 29.59       | 27.74         | 29.02       |
| <b>Ramachandran Plot</b>                 |              |             |             |               |             |
| Most Favored Region(%)                   | 97.3         | 97.7        | 97.7        | 97.9          | 97.9        |
| Additionally Allowed (%)                 | 2.32         | 1.93        | 1.93        | 1.73          | 1.74        |
| Generously Allowed (%)                   | 0.39         | 0.39        | 0.39        | 0.39          | 0.39        |

\* Values in parentheses represent highest resolution shells

## Dipole Calculations

Dipoles were calculated with a methyl at the point of attachment; structures were optimized with B3LYP/6-31G\*\* prior to dipole calculation.

### B3LYP/6-31G\*\*; PBF: DCE (10.65 ε)

| Compound | Gas Phase Energy | Solution Phase Energy | Solvation Energy (kcal/mol) | HOMO      | LUMO      | QM Dipole (D) | QM Dipole X (D) | QM Dipole Y (D) | QM Dipole Z (D) |
|----------|------------------|-----------------------|-----------------------------|-----------|-----------|---------------|-----------------|-----------------|-----------------|
| 2        | -271.578488      | -271.58247            | -2.499131                   | -0.240232 | -0.002133 | 0.463176      | -0.285068       | -0.36506        | 0               |
| 3        | -287.616296      | -287.624158           | -4.932937                   | -0.25393  | -0.026293 | 2.651741      | 2.623243        | -0.387716       | 0               |
| 4        | -287.613682      | -287.621816           | -5.104312                   | -0.253439 | -0.024655 | 3.309159      | 1.229136        | 3.072419        | 0               |
| 5        | -287.614708      | -287.623465           | -5.495336                   | -0.262352 | -0.024947 | 3.727299      | -1.913623       | -3.198563       | 0               |
| 6        | -303.655234      | -303.666316           | -6.954164                   | -0.257676 | -0.04309  | 2.377625      | 1.099734        | 2.108005        | 0               |
| 7        | -303.655009      | -303.666395           | -7.145241                   | -0.262914 | -0.043459 | 3.493428      | 1.07138         | 3.325084        | 0               |
| 8        | -303.651512      | -303.662934           | -7.167572                   | -0.262527 | -0.045594 | 3.844931      | -1.995047       | 3.286835        | 0               |
| 9        | -592.330722      | -592.335014           | -2.693378                   | -0.227616 | -0.010871 | 1.034642      | 0.665349        | -0.792335       | -0.000768       |
| 10       | -592.329452      | -592.333807           | -2.732275                   | -0.230464 | -0.012426 | 1.363993      | -0.104598       | -1.359976       | 0.000603        |
| 11       | -269.353086      | -269.357967           | -3.062408                   | -0.217858 | 0.016877  | 0.763495      | 0.425025        | -0.634254       | 0.00001         |
| 12       | -269.347484      | -269.352356           | -3.057625                   | -0.221196 | 0.014465  | 1.244542      | -0.097378       | -1.240726       | 0.000847        |
| 13       | -249.495923      | -249.504932           | -5.653324                   | -0.20191  | 0.04379   | 2.321089      | -0.426593       | 2.28155         | 0.001166        |
| 14       | -265.522355      | -265.532677           | -6.4773                     | -0.244642 | 0.015965  | 3.266098      | 1.68403         | -2.798471       | -0.000869       |
| 15       | -265.529696      | -265.542853           | -8.256297                   | -0.246401 | 0.017209  | 2.701276      | 2.409078        | 1.22198         | 0.000098        |
| 16       | -265.535403      | -265.549161           | -8.632925                   | -0.228099 | 0.025706  | 5.520107      | -1.256347       | -5.375237       | 0.000983        |
| 17       | -265.548463      | -265.563967           | -9.728804                   | -0.221107 | 0.031191  | 5.083593      | -4.764769       | 1.771959        | 0.007474        |
| 18       | -281.544963      | -281.560477           | -9.735667                   | -0.264789 | -0.01048  | 6.360991      | 2.105532        | -6.002412       | 0.000069        |
| 19       | -297.573052      | -297.591624           | -11.654125                  | -0.304945 | -0.026451 | 7.815559      | 0.845976        | 7.769638        | 0               |
| 20       | -297.583578      | -297.6046             | -13.191199                  | -0.300764 | -0.023761 | 7.766349      | 7.333139        | 2.557586        | 0               |

### B3LYP/6-31G\*\*; PBF: H<sub>2</sub>O (80.37 ε)

| Compound | Gas Phase Energy | Solution Phase Energy | Solvation Energy (kcal/mol) | HOMO      | LUMO      | QM Dipole (D) | QM Dipole X (D) | QM Dipole Y (D) | QM Dipole Z (D) |
|----------|------------------|-----------------------|-----------------------------|-----------|-----------|---------------|-----------------|-----------------|-----------------|
| 2        | -271.578452      | -271.581714           | -2.046934                   | -0.239484 | -0.00143  | 0.44862       | -0.278004       | -0.3521         | 0               |
| 3        | -287.616222      | -287.622584           | -3.991815                   | -0.253299 | -0.025335 | 2.414631      | 2.385242        | -0.375586       | 0               |
| 4        | -287.613617      | -287.620324           | -4.208525                   | -0.252981 | -0.023801 | 3.133705      | 1.137203        | 2.920082        | 0               |
| 5        | -287.614634      | -287.621834           | -4.518118                   | -0.261632 | -0.023975 | 3.516843      | -1.807647       | -3.016719       | 0               |
| 6        | -303.655093      | -303.664322           | -5.791053                   | -0.255578 | -0.042322 | 2.231569      | 1.033354        | 1.977898        | 0               |
| 7        | -303.654888      | -303.66437            | -5.949808                   | -0.260599 | -0.042648 | 3.289413      | 0.981849        | 3.13946         | 0               |
| 8        | -303.651395      | -303.66086            | -5.939002                   | -0.260244 | -0.044793 | 3.621407      | -1.879782       | 3.095321        | 0               |
| 9        | -592.330647      | -592.334221           | -2.242323                   | -0.226654 | -0.009866 | 0.963784      | 0.588012        | -0.763624       | -0.000018       |
| 10       | -592.329344      | -592.33299            | -2.288027                   | -0.229424 | -0.011389 | 1.291218      | -0.092571       | -1.287895       | -0.000954       |
| 11       | -269.353019      | -269.357124           | -2.575602                   | -0.217087 | 0.017587  | 0.715456      | 0.400727        | -0.592702       | -0.000246       |
| 12       | -269.34739       | -269.352191           | -3.01288                    | -0.220349 | 0.014368  | 1.218788      | -0.088761       | -1.215551       | 0.000546        |
| 13       | -249.495807      | -249.503211           | -4.646594                   | -0.200576 | 0.044627  | 2.186178      | -0.391365       | 2.150862        | 0.001224        |
| 14       | -265.522241      | -265.530827           | -5.387862                   | -0.24328  | 0.017347  | 3.06943       | 1.536605        | -2.657112       | -0.000978       |
| 15       | -265.529418      | -265.540434           | -6.912604                   | -0.244663 | 0.018496  | 2.559449      | 2.267994        | 1.186162        | 0.000329        |
| 16       | -265.535249      | -265.546636           | -7.145288                   | -0.226629 | 0.026859  | 5.250173      | -1.205787       | -5.109833       | 0.000633        |
| 17       | -265.548258      | -265.560962           | -7.971984                   | -0.219736 | 0.031883  | 4.76464       | -4.462819       | 1.668834        | 0.005931        |
| 18       | -281.544782      | -281.557569           | -8.023798                   | -0.263267 | -0.008382 | 6.019743      | -1.947741       | 5.695929        | 0               |
| 19       | -297.572866      | -297.588371           | -9.729789                   | -0.301057 | -0.024633 | 7.474376      | 0.847945        | 7.426122        | 0               |
| 20       | -297.5832        | -297.600634           | -10.939654                  | -0.299287 | -0.022213 | 7.383831      | 6.948783        | 2.497072        | 0               |

### B3LYP/6-31G\*\*; PBF: CHCl<sub>3</sub> (4.806 ε)

| Compound | Gas Phase Energy | Solution Phase Energy | Solvation Energy (kcal/mol) | HOMO      | LUMO      | QM Dipole (D) | QM Dipole X (D) | QM Dipole Y (D) | QM Dipole Z (D) |
|----------|------------------|-----------------------|-----------------------------|-----------|-----------|---------------|-----------------|-----------------|-----------------|
| 2        | -271.578452      | -271.578534           | -0.051712                   | -0.240829 | -0.002739 | 0.48856       | -0.300036       | -0.385577       | 0               |
| 3        | -287.616222      | -287.621639           | -3.399163                   | -0.255681 | -0.028817 | 2.842759      | 2.809459        | -0.43384        | 0               |
| 4        | -287.613617      | -287.619234           | -3.524996                   | -0.254987 | -0.027062 | 3.534241      | 1.29068         | 3.290138        | 0               |
| 5        | -287.614634      | -287.620832           | -3.889164                   | -0.264011 | -0.027126 | 3.974551      | -2.03931        | -3.41149        | 0               |
| 6        | -303.655093      | -303.663985           | -5.579627                   | -0.264041 | -0.047122 | 2.44517       | 1.136897        | 2.164791        | 0               |
| 7        | -303.654888      | -303.6647             | -6.156897                   | -0.269557 | -0.047199 | 3.755247      | 1.174285        | 3.566922        | 0               |
| 8        | -303.651395      | -303.661228           | -6.170466                   | -0.268779 | -0.049059 | 4.092602      | -2.135383       | 3.491351        | 0               |
| 9        | -592.330647      | -592.331157           | -0.320023                   | -0.228298 | -0.011627 | 1.044568      | 0.645105        | -0.82156        | 0.000932        |
| 10       | -592.329344      | -592.329858           | -0.322362                   | -0.231187 | -0.013194 | 1.379518      | -0.09718        | -1.376091       | 0.000775        |
| 11       | -269.353019      | -269.352458           | 0.352449                    | -0.218771 | 0.015738  | 0.802421      | 0.467163        | -0.65241        | -0.000225       |
| 12       | -269.34739       | -269.346688           | 0.440413                    | -0.222276 | 0.013178  | 1.296883      | -0.091947       | -1.293619       | 0.000312        |
| 13       | -249.495807      | -249.501927           | -3.840296                   | -0.20204  | 0.043967  | 2.403203      | -0.434937       | 2.363516        | 0.002206        |
| 14       | -265.522241      | -265.53082            | -5.383658                   | -0.247448 | 0.012345  | 3.484909      | 1.927776        | -2.903146       | -0.003404       |
| 15       | -265.529418      | -265.541846           | -7.798577                   | -0.248477 | 0.014121  | 2.880142      | 2.612758        | 1.211904        | -0.001133       |
| 16       | -265.535249      | -265.547646           | -7.779101                   | -0.230055 | 0.023664  | 5.787087      | -1.285639       | -5.642474       | -0.0005         |
| 17       | -265.548258      | -265.563499           | -9.564275                   | -0.222501 | 0.02984   | 5.398173      | -5.038694       | 1.936953        | 0.006607        |
| 18       | -281.544782      | -281.559717           | -9.371439                   | -0.270039 | -0.016725 | 6.79725       | -2.322442       | 6.388182        | 0               |
| 19       | -297.572866      | -297.591159           | -11.479392                  | -0.314829 | -0.033862 | 8.279873      | 0.906028        | 8.230153        | 0               |
| 20       | -297.5832        | -297.606237           | -14.455879                  | -0.306172 | -0.02977  | 8.366223      | 7.912965        | 2.716371        | 0               |

### M06-2X/6-31G\*\*; PBF: DCE (10.65 ε)

| Compound | Gas Phase Energy | Solution Phase Energy | Solvation Energy (kcal/mol) | HOMO      | LUMO      | QM Dipole (D) | QM Dipole X (D) | QM Dipole Y (D) | QM Dipole Z (D) |
|----------|------------------|-----------------------|-----------------------------|-----------|-----------|---------------|-----------------|-----------------|-----------------|
| 2        | -271.442768      | -271.447608           | -3.036903                   | -0.292104 | 0.032375  | 0.432983      | -0.270257       | -0.338284       | 0               |
| 3        | -287.479704      | -287.488451           | -5.488838                   | -0.305341 | 0.010172  | 2.693945      | 2.669744        | -0.36029        | 0               |
| 4        | -287.477151      | -287.486049           | -5.58377                    | -0.304821 | 0.01217   | 3.325684      | 1.266235        | 3.075195        | 0               |
| 5        | -287.478142      | -287.487715           | -6.007428                   | -0.314898 | 0.01127   | 3.731682      | -1.914788       | -3.202973       | 0               |
| 6        | -303.518445      | -303.53042            | -7.514676                   | -0.323877 | -0.004964 | 2.452971      | 1.138653        | 2.17268         | 0               |
| 7        | -303.518217      | -303.530406           | -7.648937                   | -0.328906 | -0.005923 | 3.513279      | 1.11233         | 3.332544        | 0               |
| 8        | -303.514755      | -303.52687            | -7.602285                   | -0.326966 | -0.00753  | 3.852266      | -1.998159       | 3.293526        | 0               |
| 9        | -592.199498      | -592.204572           | -3.184479                   | -0.279741 | 0.025431  | 1.006035      | 0.654288        | -0.764208       | -0.000739       |
| 10       | -592.198112      | -592.203298           | -3.254658                   | -0.282648 | 0.024006  | 1.307978      | -0.098133       | -1.304291       | 0.000691        |
| 11       | -269.231198      | -269.236944           | -3.605648                   | -0.269791 | 0.058325  | 0.764255      | 0.447519        | -0.619527       | -0.000053       |
| 12       | -269.2255        | -269.23125            | -3.607936                   | -0.273627 | 0.056013  | 1.236591      | -0.08754        | -1.233488       | 0.000887        |
| 13       | -249.377746      | -249.387944           | -6.399138                   | -0.253976 | 0.085194  | 2.3648        | -0.424663       | 2.326358        | 0.001263        |
| 14       | -265.402102      | -265.413447           | -7.119553                   | -0.298399 | 0.059076  | 3.327758      | 1.717168        | -2.850492       | -0.000942       |
| 15       | -265.408965      | -265.423429           | -9.076523                   | -0.300771 | 0.05996   | 2.770402      | 2.474451        | 1.245879        | 0.000179        |
| 16       | -265.41715       | -265.432012           | -9.326421                   | -0.281143 | 0.069265  | 5.606389      | -1.283138       | -5.457578       | 0.000982        |
| 17       | -265.430052      | -265.44682            | -10.521879                  | -0.273885 | 0.074125  | 5.149403      | -4.821765       | 1.807453        | 0.007536        |
| 18       | -281.422654      | -281.438995           | -10.25389                   | -0.318599 | 0.03554   | 6.463688      | -2.120071       | 6.106108        | 0               |
| 19       | -297.449575      | -297.468754           | -12.035135                  | -0.370799 | 0.022432  | 7.914928      | 0.869632        | 7.867009        | 0               |
| 20       | -297.459801      | -297.481551           | -13.648337                  | -0.357342 | 0.025114  | 7.833508      | 7.413467        | 2.530681        | 0               |

### B3LYP-D3/6-31G\*\*; PBF: DCE (10.65 ε)

| Compound | Gas Phase Energy | Solution Phase Energy | Solvation Energy (kcal/mol) | HOMO      | LUMO      | QM Dipole (D) | QM Dipole X (D) | QM Dipole Y (D) | QM Dipole Z (D) |
|----------|------------------|-----------------------|-----------------------------|-----------|-----------|---------------|-----------------|-----------------|-----------------|
| 2        | -271.586283      | -271.590317           | -2.531579                   | -0.240484 | -0.002368 | 0.460872      | -0.28335        | -0.363478       | 0               |
| 3        | -287.623258      | -287.631235           | -5.005546                   | -0.254    | -0.026448 | 2.653929      | 2.625399        | -0.3881         | 0               |
| 4        | -287.620856      | -287.629059           | -5.147537                   | -0.253428 | -0.024674 | 3.301769      | 1.224918        | 3.066147        | 0               |
| 5        | -287.621888      | -287.630728           | -5.547271                   | -0.262344 | -0.024969 | 3.720652      | -1.909846       | -3.193077       | 0               |
| 6        | -303.661245      | -303.672505           | -7.065548                   | -0.258114 | -0.043193 | 2.378039      | 1.099844        | 2.108415        | 0               |
| 7        | -303.661277      | -303.672723           | -7.182538                   | -0.262396 | -0.043493 | 3.47384       | 1.062114        | 3.307488        | 0               |
| 8        | -303.657945      | -303.669523           | -7.26515                    | -0.262922 | -0.045637 | 3.845258      | -1.995072       | 3.287202        | 0               |
| 9        | -592.336615      | -592.34097            | -2.732324                   | -0.227609 | -0.010826 | 1.009217      | 0.638246        | -0.781768       | -0.000738       |
| 10       | -592.335265      | -592.339726           | -2.799249                   | -0.230406 | -0.012386 | 1.364935      | -0.105954       | -1.360816       | 0.000601        |
| 11       | -269.358227      | -269.363164           | -3.097821                   | -0.217786 | 0.016959  | 0.750408      | 0.414392        | -0.625612       | -0.000029       |
| 12       | -269.352698      | -269.357654           | -3.109574                   | -0.221117 | 0.01455   | 1.227594      | -0.098625       | -1.223626       | 0.000815        |
| 13       | -249.50171       | -249.51078            | -5.69162                    | -0.201869 | 0.043741  | 2.279418      | -0.414338       | 2.241443        | 0.001174        |
| 14       | -265.527471      | -265.537828           | -6.499675                   | -0.244664 | 0.016147  | 3.249848      | 1.667978        | -2.78915        | -0.00086        |
| 15       | -265.534464      | -265.547799           | -8.367494                   | -0.246286 | 0.017235  | 2.65305       | 2.361626        | 1.208883        | 0.000157        |
| 16       | -265.540644      | -265.554512           | -8.702104                   | -0.228082 | 0.02573   | 5.498556      | -1.254802       | -5.353465       | 0.000953        |
| 17       | -265.553358      | -265.568995           | -9.812129                   | -0.221088 | 0.031158  | 5.05346       | -4.737936       | 1.757659        | 0.007338        |
| 18       | -281.549329      | -281.565063           | -9.872712                   | -0.264785 | -0.010604 | 6.364264      | -2.109336       | 6.004544        | 0               |
| 19       | -297.576723      | -297.595385           | -11.71033                   | -0.304661 | -0.026359 | 7.787776      | 0.847453        | 7.74153         | 0               |
| 20       | -297.586912      | -297.608356           | -13.456348                  | -0.300768 | -0.023764 | 7.777045      | 7.344791        | 2.556654        | 0               |

### B3LYP/6-31G\*\*; gas phase

| Compound | Gas Phase Energy | Solution Phase Energy | Solvation Energy (kcal/mol) | HOMO      | LUMO      | QM Dipole (D) | QM Dipole X (D) | QM Dipole Y (D) | QM Dipole Z (D) |
|----------|------------------|-----------------------|-----------------------------|-----------|-----------|---------------|-----------------|-----------------|-----------------|
| 2        | -271.578452      | -271.590317           | -2.531579                   | -0.235541 | 0.002387  | 0.350155      | -0.216006       | -0.27559        | 0               |
| 3        | -287.616222      | -287.631235           | -5.005546                   | -0.247809 | -0.020994 | 1.803148      | 1.779325        | -0.292143       | 0               |
| 4        | -287.613617      | -287.629059           | -5.147537                   | -0.248305 | -0.01909  | 2.369615      | 0.837358        | 2.216733        | 0               |
| 5        | -287.614634      | -287.630728           | -5.547271                   | -0.249441 | -0.019466 | 2.678329      | -1.376729       | -2.297404       | 0               |
| 6        | -303.655093      | -303.672505           | -7.065548                   | -0.24486  | -0.038586 | 1.636696      | 0.765002        | 1.446909        | 0               |
| 7        | -303.654888      | -303.672723           | -7.182538                   | -0.249001 | -0.038582 | 2.516365      | 0.699957        | 2.417055        | 0               |
| 8        | -303.651395      | -303.669523           | -7.26515                    | -0.248332 | -0.040486 | 2.78933       | -1.449873       | 2.382904        | 0               |
| 9        | -592.330647      | -592.34097            | -2.732324                   | -0.222568 | -0.005639 | 0.74899       | 0.421677        | -0.619011       | -0.000133       |
| 10       | -592.329344      | -592.339726           | -2.799249                   | -0.225458 | -0.00733  | 0.970368      | -0.084307       | -0.966698       | -0.000455       |
| 11       | -269.353019      | -269.363164           | -3.097821                   | -0.213146 | 0.021886  | 0.566741      | 0.305094        | -0.477612       | -0.000307       |
| 12       | -269.34739       | -269.357654           | -3.109574                   | -0.217191 | 0.018931  | 0.94826       | -0.079153       | -0.944951       | 0.000181        |
| 13       | -249.495807      | -249.51078            | -5.69162                    | -0.195236 | 0.04802   | 1.744903      | -0.29823        | 1.719228        | 0.001119        |
| 14       | -265.522241      | -265.537828           | -6.499675                   | -0.236191 | 0.023951  | 2.379334      | 1.07995         | -2.120126       | -0.000401       |
| 15       | -265.529418      | -265.547799           | -8.367494                   | -0.236305 | 0.023972  | 1.942908      | 1.694168        | 0.951151        | 0.000847        |
| 16       | -265.535249      | -265.554512           | -8.702104                   | -0.220244 | 0.031237  | 4.134794      | -0.965472       | -4.020495       | 0.00027         |
| 17       | -265.548258      | -265.568995           | -9.812129                   | -0.214502 | 0.034837  | 3.62858       | -1.340388       | 1.257053        | 0.0031          |
| 18       | -281.544782      | -281.565063           | -9.872712                   | -0.256426 | -0.000158 | 4.703161      | -1.40877        | 4.487214        | 0               |
| 19       | -297.572866      | -297.595385           | -11.71033                   | -0.282679 | -0.01712  | 5.932309      | 0.747572        | 5.885017        | 0               |
| 20       | -297.5832        | -297.608356           | -13.456348                  | -0.283974 | -0.015807 | 5.78498       | 5.413476        | 2.039676        | 0               |

## LMP2/6-31G\*\*; gas phase

| Compound | Gas Phase Energy | Solution Phase Energy | Solvation Energy (kcal/mol) | HOMO      | LUMO     | QM Dipole (D) | QM Dipole X (D) | QM Dipole Y (D) | QM Dipole Z (D) |
|----------|------------------|-----------------------|-----------------------------|-----------|----------|---------------|-----------------|-----------------|-----------------|
| 2        | -270.660593      | -271.590317           | -2.531579                   | -0.316801 | 0.143843 | 0.460872      | -0.28335        | -0.363478       | 0               |
| 3        | -286.67968       | -287.631235           | -5.005546                   | -0.331147 | 0.122068 | 2.653929      | 2.625399        | -0.3881         | 0               |
| 4        | -286.678839      | -287.629059           | -5.147537                   | -0.330547 | 0.125119 | 3.301769      | 1.224918        | 3.066147        | 0               |
| 5        | -286.679482      | -287.630728           | -5.547271                   | -0.340129 | 0.124353 | 3.720652      | -1.909846       | -3.193077       | 0               |
| 6        | -302.704589      | -303.672505           | -7.065548                   | -0.360591 | 0.108706 | 2.378039      | 1.099844        | 2.108415        | 0               |
| 7        | -302.702124      | -303.672723           | -7.182538                   | -0.366447 | 0.107929 | 3.47384       | 1.062114        | 3.307488        | 0               |
| 8        | -302.70012       | -303.669523           | -7.26515                    | -0.35725  | 0.1059   | 3.845258      | -1.995072       | 3.287202        | 0               |
| 9        | -591.120704      | -592.34097            | -2.732324                   | -0.311406 | 0.132776 | 1.009217      | 0.638246        | -0.781768       | -0.000738       |
| 10       | -591.119356      | -592.339726           | -2.799249                   | -0.315113 | 0.129543 | 1.364935      | -0.105954       | -1.360816       | 0.000601        |
| 11       | -268.511014      | -269.363164           | -3.097821                   | -0.301147 | 0.170253 | 0.750408      | 0.414392        | -0.625612       | -0.000029       |
| 12       | -268.505703      | -269.357654           | -3.109574                   | -0.30605  | 0.166146 | 1.227594      | -0.098625       | -1.223626       | 0.000815        |
| 13       | -248.684136      | -249.51078            | -5.69162                    | -0.281473 | 0.195672 | 2.279418      | -0.414338       | 2.241443        | 0.001174        |
| 14       | -264.696015      | -265.537828           | -6.499675                   | -0.332034 | 0.173594 | 3.249848      | 1.667978        | -2.78915        | -0.00086        |
| 15       | -264.702661      | -265.547799           | -8.367494                   | -0.333524 | 0.172465 | 2.65305       | 2.361626        | 1.208883        | 0.000157        |
| 16       | -264.708941      | -265.554512           | -8.702104                   | -0.308957 | 0.183902 | 5.498556      | -1.254802       | -5.353465       | 0.000953        |
| 17       | -264.721616      | -265.568995           | -9.812129                   | -0.303034 | 0.187446 | 5.05346       | -4.737936       | 1.757659        | 0.007338        |
| 18       | -280.703001      | -281.565063           | -9.872712                   | -0.350306 | 0.152408 | 6.364264      | -2.109336       | 6.004544        | 0               |
| 19       | -296.715009      | -297.595385           | -11.71033                   | -0.40561  | 0.14152  | 7.787776      | 0.847453        | 7.74153         | 0               |
| 20       | -296.724616      | -297.608356           | -13.456348                  | -0.39568  | 0.142856 | 7.777045      | 7.344791        | 2.556654        | 0               |

## Synthetic Procedures

**General Procedures:** Reactions were magnetically stirred. Air and/or moisture sensitive reactions were carried out under an argon atmosphere in oven-dried glassware using anhydrous solvents from commercial suppliers. Air and/or moisture sensitive reagents were transferred via syringe or cannula and were introduced into reaction vessels through rubber septa. All anhydrous solvents used were purchased from Sigma-Aldrich and used without further purification. Solvents to be employed in flash column chromatography and reaction work-up procedures were purchased from either Sigma-Aldrich or Fisher Scientific. All other reagents were obtained commercially and used without further purification, unless otherwise stated. Reactions were monitored using LCMS and thin layer chromatography (TLC) performed on 0.25-mm EMD pre-coated glass-backed silica gel 60 F-254 plates. Compounds were visualized under UV light or through staining with permanganate, bromocresol green, or magic, when appropriate. Reaction products and chromatography fractions were concentrated by rotary evaporation at 30-35 °C at 20 Torr, then Hi-Vac at 0.5 Torr overnight, unless otherwise indicated.

**Instrumentation:** NMR spectra were recorded on a Bruker AvanceIII HD 400 MHz



spectrometer (with 5 mm BBFO Z-gradient Smart Probe) calibrated to CH(D)Cl<sub>3</sub> as an internal reference (7.26 and 77.00 ppm for <sup>1</sup>H and <sup>13</sup>C NMR spectra, respectively). Data for <sup>1</sup>H NMR spectra are reported in terms of chemical shift (δ, ppm), multiplicity, coupling constant (Hz), and integration. Data for <sup>13</sup>C NMR spectra are reported in terms of chemical shift (δ, ppm), with multiplicity and coupling constants in the case of C–F coupling. The following abbreviations are used to denote the multiplicities: s = singlet; d = doublet; dd = doublet of doublets; dt = doublet of triplets; dq = doublet of quartets; ddd = doublet of doublet of doublets; t = triplet; td = triplet of doublets; tt = triplet of triplets; q = quartet; qd = quartet of doublets; quin = quintet; sex = sextet; m = multiplet. LCMS and compound purity were determined using a Waters Micromass ZQ 4000, equipped with a Waters 2795 Separation Module, Waters 2996 Photodiode Array Detector, and a Waters 2424 ELSD. Separations were carried out with an XBridge BEH C18, 5μm, 4.6 x 20 mm column, at ambient temperature (unregulated), using a mobile phase of water-methanol containing a constant 0.1% formic acid. HPLC was performed on a Waters 2535 Separation Module with a Waters 2998 Photodiode Array Detector. Separations were carried out with an XBridge BEH C18, 5μm, 19 x 50 mm column, at ambient temperature (unregulated), using a mobile phase of water-methanol containing a constant 0.05% formic acid. Column chromatography was carried out using a Biotage SP1 flash chromatography system with silica gel cartridges from Silicycle.

**General Procedure A:** A 20 mL vial is charged with the appropriate carboxylic acid (1.0 equiv), commercially available 3-(1*H*-tetrazol-5-yl)aniline (1.1 equiv), DMF, *N,N*-diisopropylethylamine (2.1 equiv), and HATU (1.1 equiv). The reaction mixture is stirred for 18h or until judged complete by LCMS. The crude reaction mixture is directly purified by reverse phase HPLC (water/MeOH/0.05% formic acid) to afford the desired product.

**General Procedure B:** A 20 mL vial is charged with the appropriate carboxylic acid (1.0 equiv), DMF, and *N,N*-diisopropylethylamine (1.0 equiv). HATU (1.05 equiv) is then added, and the reaction mixture is allowed to stir for 20 minutes. Commercially available 3-(1*H*-tetrazol-5-yl)aniline (1.1 equiv) and *N,N*-diisopropylethylamine (1.1 equiv) are subsequently added, and the reaction is stirred at room temperature for 24 h or until judged complete by LCMS. The crude reaction mixture is directly purified by reverse phase HPLC (water/MeOH/0.05% formic acid) to afford the desired product.

**General Procedure C:** A 20 mL vial is charged with the appropriate *t*-butyl ester (1.0 equiv), fitted with a septa, and purged with Ar. The vial is then charged with dry 4M HCl in dioxanes (4 mL), and the reaction is stirred at room temperature for 18-72h or until judged complete by LCMS. The reaction mixture is then concentrated and dried under hvac overnight, affording the desired semi-crude product.

**General Procedure D:** A 3 mL vial with cap is purged with Ar and charged with the appropriate halide (1.0 equiv), bis(pinacolato)diboron (1.1 equiv), potassium acetate (2.0 equiv), 1,1'-bis(diphenylphosphino)ferrocene-palladium(II)dichloride dichloromethane complex (0.02 equiv.), and dry tetrahydrofuran (1 mL). The reaction mixture is purged with Ar, sealed, and heated at 80 °C for 18h. The reaction mixture is then cooled to rt and charged with a solution of potassium carbonate (2.0 equiv) in water (620 ul), the second halide (1.2 equiv), and 1,1'-bis(diphenylphosphino)ferrocene-palladium(II)dichloride dichloromethane complex (0.02 equiv). The reaction mixture is purged with Ar, sealed, and vigorously stirred at 80 °C for 18h.

The crude reaction mixture is then transferred to a sep funnel with ~ 75 mL EtOAc and ~10 mL water. ~ 50 mL sat. NaHCO<sub>3</sub> is added, the layers separated, and the organic layer further washed with ~ 40 mL water and brine. The organic layer is dried over MgSO<sub>4</sub>, concentrated, and purified on a silica column with EtOAc:hexanes to afford the desired product.

**General Procedure E:** **S1** (1 equiv) and an aqueous K<sub>2</sub>CO<sub>3</sub> solution (1M, 1.25 equiv) were added to 0.5 mL of 1,4 dioxane. Argon was bubbled through the resulting solution to remove oxygen before the boronic acid (1.2 equiv) and 1,1'-bis(diphenylphosphino)ferrocene-palladium(II)dichloride dichloromethane complex (0.05 equiv) were added. The reaction was then warmed to 80 °C and stirred until complete by LCMS (18–24h). The reaction mixture was allowed to cool to rt, diluted with MeOH, and filtered through celite. The filtrate was concentrated and purified as noted.

**General Procedure F:** Aryl *t*-butyl ester (1 equiv) was suspended in 1:1 TFA/CH<sub>2</sub>Cl<sub>2</sub> and stirred until complete by either TLC or LCMS (3-18 h). Solvent was removed in vacuo and the resulting crude acid was used without further purification. The newly generated acid (1.0 equiv), triethylamine (3.0 equiv), and 3-(1*H*-tetrazol-5-yl)aniline (1.2 equiv) were suspended in 0.5 mL DMF and placed under argon. HATU (1.5 equiv) was added and the reaction was stirred until complete by LCMS (18-24h). The reaction was then diluted with DMF and purified by reverse phase HPLC (water/MeOH/0.05% formic acid) to afford the desired product.

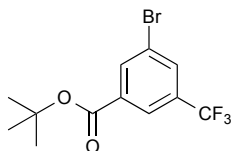

**tert-butyl 3-bromo-5-(trifluoromethyl)benzoate (S1).** Commercially available 3-bromo-5-trifluoromethylbenzoic acid (5.000 g, 18.6 mmol, 1.0 equiv) was dissolved in dry dichloromethane (50 ml). *N,N*-dimethylformamide (400 ul, 5.2 mmol, 0.3 equiv) was added; oxalyl chloride (2.000 ml, 23.3 mmol, 1.3 equiv.) was subsequently added dropwise. The reaction mixture was allowed to stir at rt for 4h. The solvent was then removed under reduced pressure, and the residue was azeotroped with toluene twice. The remaining residue was diluted with dry tetrahydrofuran (65 mL) and cooled to 0 °C. Lithium *tert*-butoxide (2.976 g, 37.2 mmol, 2.0 equiv) was added in bulk to the reaction mixture; the reaction mixture was allowed to slowly warm to rt over 18h. ~ 100 mL water was then added, and the reaction mixture was extracted with 2 x 100 mL EtOAc. The organics were washed with ~ 50 mL 0.1 N HCl, water, and brine, then dried over MgSO<sub>4</sub>. Purified on a silica column with 0-5% EtOAc:hexanes. **S1** (4.589, 76%) obtained as a colorless, crystalline solid. <sup>1</sup>H NMR (400 MHz, CDCl<sub>3</sub>) δ = 8.30 (s, 1H), 8.18 (s, 1H), 7.93 (s, 1H), 1.63 (s, 9H); <sup>13</sup>C NMR (100 MHz, CDCl<sub>3</sub>) δ = 163.01, 135.72, 134.67, 132.49 (q, *J* = 33.5 Hz), 132.00 (q, *J* = 3.7 Hz), 125.02 (q, *J* = 3.7 Hz), 122.71, 122.83 (q, *J* = 272.9 Hz), 82.78, 28.08; <sup>19</sup>F NMR (376 MHz, CDCl<sub>3</sub>) δ = -62.89 (s, 3F); did not ionize by ESI.

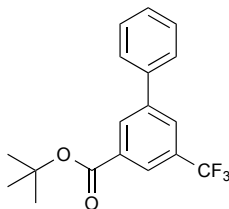

**tert-butyl 5-(trifluoromethyl)-[1,1'-biphenyl]-3-carboxylate (S2).** S1 was reacted with commercially available phenylboronic acid according to general procedure E. Crude product was filtered through a silica gel plug; the plug was washed with hexanes and the product eluted with ethyl acetate. S2 (46 mg, 65%) obtained as a colorless liquid.  $^1\text{H}$  NMR (400 MHz,  $\text{CDCl}_3$ )  $\delta$  = 8.42 (s, 1H), 8.24, (s, 1H), 8.01 (s, 1H), 7.64 - 7.67 (m, 2H), 7.50 - 7.54 (m, 2H), 7.43 - 7.47 (m, 1 H), 1.67 (s, 9H); did not ionize by ESI.

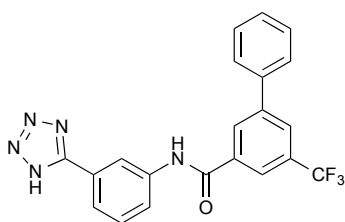

**N-(3-(1H-tetrazol-5-yl)phenyl)-5-(trifluoromethyl)-[1,1'-biphenyl]-3-carboxamide (2).** S2 (46.0 mg, 0.173 mmol, 1.0 equiv) was reacted according to general procedure F. 2 (28.8 mg, 50% over two steps) was obtained as a white solid.  $^1\text{H}$  NMR (400 MHz, acetone- $d_6$ )  $\delta$  = 10.16 (br s, 1H), 8.69 (s, 1H), 8.61 (s, 1H), 8.35 (s, 1H), 8.19 (s, 1H), 8.07 (br d,  $J$  = 8.04 Hz, 1H), 7.93 (br d,  $J$  = 7.67 Hz, 1H), 7.86 (br d,  $J$  = 7.43 Hz, 2H), 7.54 - 7.65 (m, 3H), 7.46 - 7.53 (m, 1H);  $^{13}\text{C}$  NMR (100 MHz, acetone- $d_6$ )  $\delta$  = 164.22, 156.83, 142.57, 139.97, 138.60, 136.75, 131.07 (q,  $J$  = 32.28 Hz), 129.79, 129.69, 129.19, 128.59, 127.29, 126.21 - 126.47 (m), 125.84, 123.18 - 123.40 (m), 122.60, 118.78;  $^{19}\text{F}$  NMR (376 MHz, acetone- $d_6$ )  $\delta$  = -63.03 (s, 3F); HRMS (ESI) calculated for  $\text{C}_{21}\text{H}_{13}\text{F}_3\text{N}_5\text{O}$   $[\text{M} - \text{H}]^-$   $m/z$  408.1078, found 408.1070.

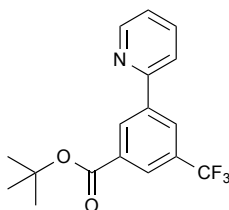

**tert-butyl 3-(pyridin-2-yl)-5-(trifluoromethyl)benzoate (S3).** S1 (65.0 mg, 0.20 mmol, 1 equiv) was reacted with commercially available 2-bromopyridine according to general procedure D, except 5 mol% catalyst was used. Instead of a workup, the reaction mixture was allowed to cool to room temperature, diluted with MeOH, and filtered through celite. The filtrate was concentrated and purified via silica gel with EtOAc:hexanes. S3 (18.0 mg, 26%) obtained as a clear liquid.  $^1\text{H}$  NMR (400 MHz,  $\text{CDCl}_3$ )  $\delta$  = 8.72 - 8.80 (m, 2H), 8.50 - 8.55 (m, 1H), 8.29 (s, 1H), 7.83 - 7.89 (m, 2H), 7.31 - 7.38 (m, 1H), 1.66 (s, 9H); LRMS (ESI) calculated for  $\text{C}_{17}\text{H}_{17}\text{F}_3\text{NO}_2$   $[\text{M} + \text{H}]^+$   $m/z$  324.11, found 324.02.

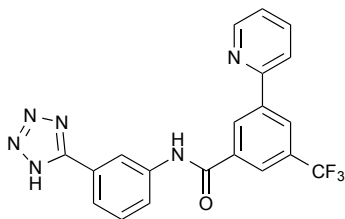

**N-(3-(1*H*-tetrazol-5-yl)phenyl)-3-(pyridin-2-yl)-5-(trifluoromethyl)benzamide (3).** **S3** (18.0 mg, 0.056 mmol, 1.0 equiv) was reacted according to general procedure F. **3** (16.4 mg, 78% over two steps) obtained as a white solid.  $^1\text{H}$  NMR (400 MHz, acetone- $d_6$ )  $\delta$  = 10.31 (br s, 1H), 9.05 (s, 1H), 8.77 (dd,  $J$  = 4.75, 0.73 Hz, 1H), 8.75 (s, 1H), 8.71 (s, 1H), 8.44 (s, 1H), 8.26 (d,  $J$  = 7.91 Hz, 1H), 8.17 (br d,  $J$  = 8.16 Hz, 1H), 7.95 - 8.01 (m, 2H), 7.57 (t,  $J$  = 7.97 Hz, 1H), 7.46 (ddd,  $J$  = 7.52, 4.78, 0.73 Hz, 1H);  $^{13}\text{C}$  NMR (100 MHz, acetone- $d_6$ )  $\delta$  = 164.09, 154.21, 149.91, 140.80, 139.95, 137.42, 136.69, 130.93 (d,  $J$  = 32.28 Hz), 129.62, 129.10, 126.11 (br d,  $J$  = 3.67 Hz), 124.78 (br d,  $J$  = 3.67 Hz), 123.59, 122.52, 122.07, 120.87, 118.94;  $^{19}\text{F}$  NMR (376 MHz, acetone- $d_6$ )  $\delta$  = -63.12 (s, 3F); HRMS (ESI) calculated for  $\text{C}_{20}\text{H}_{12}\text{F}_3\text{N}_6\text{O}$   $[\text{M} - \text{H}]^-$   $m/z$  409.1030, found 409.1022.

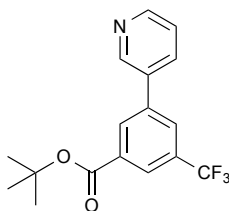

**tert-butyl 3-(pyridin-3-yl)-5-(trifluoromethyl)benzoate (S4).** **S1** was reacted with commercially available pyridin-3-ylboronic acid according to general procedure E. Crude product was purified via silica gel with EtOAc:hexanes. **S4** (26 mg, 40%) obtained as a colorless liquid.  $^1\text{H}$  NMR (400 MHz,  $\text{CDCl}_3$ )  $\delta$  = 8.89 - 8.94 (m, 1H), 8.70 (br d,  $J$  = 4.14 Hz, 1H), 8.40 (s, 1H), 8.28 (s, 1H), 7.99 (s, 1H), 7.93 - 7.97 (m, 1H), 7.46 (dd,  $J$  = 7.91, 4.87 Hz, 1H), 1.66 (s, 9H);  $^{13}\text{C}$  NMR (100 MHz,  $\text{CDCl}_3$ )  $\delta$  = 164.03, 149.56, 148.20, 139.04, 134.60, 133.86, 131.86 (q,  $J$  = 30.08 Hz), 131.26, 127.35 - 127.54 (m), 125.62 - 125.95 (m), 123.82, 82.49, 28.14;  $^{19}\text{F}$  NMR (376 MHz,  $\text{CDCl}_3$ )  $\delta$  = -62.68 (s, 3F); LRMS (ESI) calculated for  $\text{C}_{17}\text{H}_{17}\text{F}_3\text{NO}_2$   $[\text{M} + \text{H}]^+$   $m/z$  324.11, found 324.02.

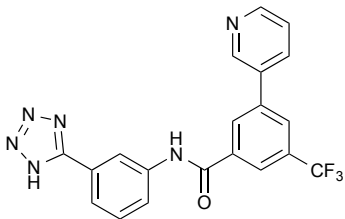

**N-(3-(1*H*-tetrazol-5-yl)phenyl)-3-(pyridin-3-yl)-5-(trifluoromethyl)benzamide (4).** **S4** (34 mg, 0.105 mmol, 1.0 equiv) was reacted according to general procedure F. **4** (25 mg, 58% over two steps) obtained as a white solid.  $^1\text{H}$  NMR (400 MHz, pyridine- $d_5$ )  $\delta$  = 11.72 (s, 1H), 9.27 (br s, 1H), 9.07 - 9.22 (m, 3H), 9.04 (br s, 1H), 8.76 (br d,  $J$  = 4.75 Hz, 1H), 8.70 (s, 2H), 8.64 (s, 1H), 8.21 (br dd,  $J$  = 6.15, 1.03 Hz, 2H), 8.12 (s, 1H), 7.85 (br dd,  $J$  = 7.85, 1.28 Hz, 1H), 7.33

(br dd,  $J = 7.85, 4.81$  Hz, 1H);  $^{13}\text{C}$  NMR (100 MHz, pyridine- $d_5$ )  $\delta = 165.24, 149.76, 148.58, 140.59, 139.35, 137.59, 134.48, 134.16, 131.07$  (d,  $J = 32.28$  Hz), 130.48, 129.99, 127.61, 126.56 (br d,  $J = 3.67$  Hz), 124.48 (br d,  $J = 4.40$  Hz), 123.82, 123.13, 122.85, 119.87;  $^{19}\text{F}$  NMR (376 MHz, pyridine- $d_5$ )  $\delta = -62.03$  (s, 3F); HRMS (ESI) calculated for  $\text{C}_{20}\text{H}_{12}\text{F}_3\text{N}_6\text{O}$   $[\text{M} - \text{H}]^-$   $m/z$  409.1030, found 409.1023.

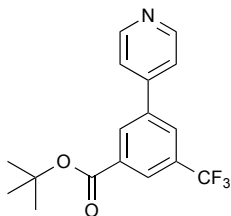

**tert-butyl 3-(pyridin-4-yl)-5-(trifluoromethyl)benzoate (S5).** **S1** was reacted with commercially available pyridin-4-ylboronic acid according to general procedure E. Crude product was purified via HPLC using water/MeOH/0.05% formic acid. **S5** (34 mg, 54%) obtained as a white powder.  $^1\text{H}$  NMR (400 MHz,  $\text{CDCl}_3$ )  $\delta = 8.79$  (br s, 2H), 8.45 (s, 1H), 8.31 (s, 1H), 8.04 (s, 1H), 7.59 (br s, 2H), 1.66 (s, 9H);  $^{13}\text{C}$  NMR (100 MHz,  $\text{CDCl}_3$ )  $\delta = 163.90, 150.61, 146.09, 139.42, 133.95, 131.92$  (d,  $J = 33.01$  Hz), 131.15, 127.35 (br d,  $J = 3.67$  Hz), 126.61 (q,  $J = 3.67$  Hz), 82.60, 28.14;  $^{19}\text{F}$  NMR (376 MHz,  $\text{CDCl}_3$ )  $\delta = -62.70$  (s, 3F); LRMS (ESI) calculated for  $\text{C}_{17}\text{H}_{17}\text{F}_3\text{NO}_2$   $[\text{M} + \text{H}]^+$   $m/z$  324.11, found 324.09.

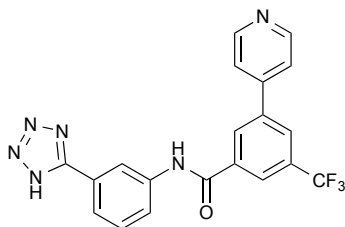

**N-(3-(1H-tetrazol-5-yl)phenyl)-3-(pyridin-4-yl)-5-(trifluoromethyl)benzamide (5).** **S5** (19.4 mg, 0.060 mmol, 1.0 equiv) was reacted according to general procedure F. **5** (19 mg, 77% over two steps) obtained as a white solid.  $^1\text{H}$  NMR (400 MHz, pyridine- $d_5$ )  $\delta = 11.74$  (s, 1H), 9.26 (br d,  $J = 1.46$  Hz, 1H), 8.77 - 8.83 (m, 2H), 8.70 (s, 3H), 8.66 (s, 1H), 8.17 - 8.23 (m, 2H), 8.15 (s, 1H), 7.56 - 7.61 (m, 1H), 7.46 - 7.52 (m, 2H);  $^{13}\text{C}$  NMR (100 MHz, pyridine- $d_5$ )  $\delta = 165.10, 150.80, 145.43, 140.57, 139.53, 137.64, 131.12$  (d,  $J = 33.01$  Hz), 130.42, 130.03, 127.47, 126.53 (br d,  $J = 3.67$  Hz), 125.17 - 125.70 (m), 123.16, 121.69, 119.87;  $^{19}\text{F}$  NMR (376 MHz, pyridine- $d_5$ )  $\delta = -62.07$  (s, 3F); HRMS (ESI) calculated for  $\text{C}_{20}\text{H}_{12}\text{F}_3\text{N}_6\text{O}$   $[\text{M} - \text{H}]^-$   $m/z$  409.1030, found 409.1023.

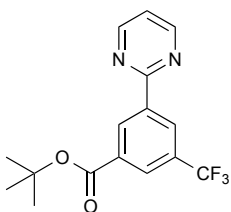

**tert-butyl 3-(pyrimidin-2-yl)-5-(trifluoromethyl)benzoate (S6).** **S1** (100 mg, 0.308 mmol, 1.0 equiv) was reacted with commercially available 2-bromopyrimidine according to general procedure D. **S6** (75.2 mg, 75%) obtained as a white solid.  $^1\text{H}$  NMR (400 MHz,  $\text{CDCl}_3$ )  $\delta$  = 9.23 (br s, 1H), 8.90 (br s, 1H), 8.86 (d,  $J$  = 4.9 Hz, 2H), 8.35 (s, 1H), 7.28 (t,  $J$  = 4.9 Hz, 1H), 1.69 - 1.63 (m, 9H);  $^{13}\text{C}$  NMR (100 MHz,  $\text{CDCl}_3$ )  $\delta$  = 164.23, 162.64, 157.44, 138.87, 133.48, 132.12, 131.33 (q,  $J$  = 33.0 Hz), 128.58 (q,  $J$  = 3.7 Hz), 128.13 (q,  $J$  = 4.2 Hz), 123.77 (q,  $J$  = 272.9 Hz), 120.03, 82.17, 28.14;  $^{19}\text{F}$  NMR (376 MHz,  $\text{CDCl}_3$ )  $\delta$  = -62.66 (s, 3F); LRMS (ESI) calculated for  $\text{C}_{16}\text{H}_{16}\text{F}_3\text{N}_2\text{O}_2$   $[\text{M} + \text{H}]^+$   $m/z$  325.11, found 324.94.

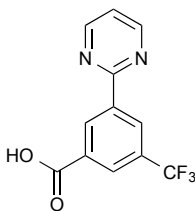

**3-(pyrimidin-2-yl)-5-(trifluoromethyl)benzoic acid (S7).** **S6** (75.2 mg, 0.232 mmol, 1.0 equiv) was reacted according to general procedure C (24h). Semi-crude **S7** (65.6 mg, 106%) obtained as a white solid.  $^1\text{H}$  NMR (400 MHz,  $\text{CD}_3\text{OD}$ , drops  $\text{CDCl}_3$ )  $\delta$  = 9.20 (br s, 1H), 8.90 (d,  $J$  = 4.9 Hz, 2H), 8.83 (br s, 1H), 8.34 (br s, 1H), 7.46 (t,  $J$  = 5.0 Hz, 1H);  $^{13}\text{C}$  NMR (100 MHz,  $\text{CD}_3\text{OD}$ , drops  $\text{CDCl}_3$ )  $\delta$  = 166.42, 161.55, 157.62, 138.31, 132.48, 132.26, 131.21 (q,  $J$  = 33.0 Hz), 128.38 (q,  $J$  = 3.7 Hz), 128.11 (q,  $J$  = 3.7 Hz), 120.49, 123.67 (q,  $J$  = 272.2 Hz);  $^{19}\text{F}$  NMR (376 MHz,  $\text{CD}_3\text{OD}$ , drops  $\text{CDCl}_3$ )  $\delta$  = -63.99 (s, 3F); LRMS (ESI) calculated for  $\text{C}_{12}\text{H}_6\text{F}_3\text{N}_2\text{O}_2$   $[\text{M} - \text{H}]^-$   $m/z$  267.05, found 267.06.

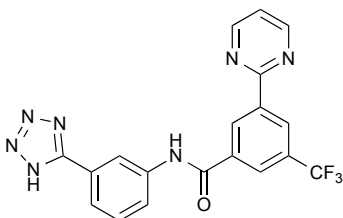

**N-(3-(1H-tetrazol-5-yl)phenyl)-3-(pyrimidin-2-yl)-5-(trifluoromethyl)benzamide (6).** **S7** (65.6 mg, 0.245 mmol, 1.0 equiv) was reacted with 3-(1H-tetrazol-5-yl)aniline in 3 mL DMF according to general procedure B. **6** (65.4 mg, 65%) obtained as a white solid.  $^1\text{H}$  NMR (400 MHz,  $\text{CD}_3\text{OD}$ , drops  $\text{CDCl}_3$ )  $\delta$  = 9.18 (br s, 1H), 8.84 (d,  $J$  = 4.9 Hz, 2H), 8.83 (br s, 1H), 8.35 (t,  $J$  = 1.7 Hz, 1H), 8.32 (br s, 1H), 7.91 (br dd,  $J$  = 1.2, 8.3 Hz, 1H), 7.74 (br d,  $J$  = 7.8 Hz, 1H), 7.50 (t,  $J$  = 7.9 Hz, 1H), 7.36 (t,  $J$  = 4.9 Hz, 1H);  $^{13}\text{C}$  NMR (100 MHz,  $\text{CD}_3\text{OD}$ , drops  $\text{CDCl}_3$ )  $\delta$  = 166.65, 163.18, 158.59, 157.50, 140.31, 139.95, 137.21, 132.38 (q,  $J$  = 30.1 Hz), 131.34, 130.75, 128.59 (d,  $J$  = 3.7 Hz), 127.37 (q,  $J$  = 3.7 Hz), 126.03, 124.49, 124.01, 124.72 (q,  $J$  = 272.2 Hz), 121.38, 120.32;  $^{19}\text{F}$  NMR (376 MHz,  $\text{CD}_3\text{OD}$ , drops  $\text{CDCl}_3$ )  $\delta$  = -63.57 (s, 3F); HRMS (ESI) calculated for  $\text{C}_{19}\text{H}_{11}\text{F}_3\text{N}_7\text{O}$   $[\text{M} - \text{H}]^-$   $m/z$  410.0983, found 410.0974.

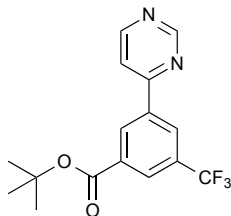

**tert-butyl 3-(pyrimidin-4-yl)-5-(trifluoromethyl)benzoate (S8).** **S1** (100 mg, 0.308 mmol, 1.0 equiv) was reacted with commercially available 4-chloropyrimidine hydrochloride according to general procedure D, except potassium carbonate (136 mg, 0.984 mmol, 3.2 equiv) and water (992  $\mu$ l) were used in the second step. **S8** (84.5 mg, 85%) obtained as a white solid.  $^1\text{H}$  NMR (400 MHz,  $\text{CDCl}_3$ )  $\delta$  = 9.31 (br d,  $J$  = 1.4 Hz, 1H), 8.84 (d,  $J$  = 5.4 Hz, 1H), 8.80 (br s, 1H), 8.57 (br s, 1H), 8.33 (br s, 1H), 7.81 (dd,  $J$  = 1.5, 5.4 Hz, 1H), 1.63 (s, 9H);  $^{13}\text{C}$  NMR (100 MHz,  $\text{CDCl}_3$ )  $\delta$  = 163.71, 161.41, 159.24, 158.03, 137.67, 133.77, 131.82 (q,  $J$  = 33.0 Hz), 130.86, 128.32 (q,  $J$  = 3.9 Hz), 127.56 (q,  $J$  = 3.7 Hz), 123.43 (q,  $J$  = 272.9 Hz), 117.03, 82.53, 28.03;  $^{19}\text{F}$  NMR (376 MHz,  $\text{CDCl}_3$ )  $\delta$  = -62.78 (s, 3F); LRMS (ESI) calculated for  $\text{C}_{16}\text{H}_{16}\text{F}_3\text{N}_2\text{O}_2$  [ $\text{M} + \text{H}$ ] $^+$   $m/z$  325.11, found 325.01.

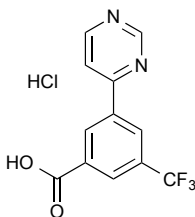

**3-(pyrimidin-4-yl)-5-(trifluoromethyl)benzoic acid hydrochloride (S9).** **S8** (84.5 mg, 0.261 mmol, 1.0 equiv) was reacted according to general procedure C (24h). Semi-crude **S9** (80.8 mg, 102%) obtained as a white solid.  $^1\text{H}$  NMR (400 MHz,  $\text{CD}_3\text{OD}$ )  $\delta$  = 9.60 (br s, 1H), 9.20 (d,  $J$  = 6.1 Hz, 1H), 9.16 (br s, 1H), 8.86 (br s, 1H), 8.67 (dd,  $J$  = 1.0, 6.1 Hz, 1H), 8.50 (br s, 1H);  $^{13}\text{C}$  NMR (100 MHz,  $\text{CD}_3\text{OD}$ )  $\delta$  = 166.81, 165.56, 153.72, 152.18, 136.13, 133.41, 132.52, 131.91 (q,  $J$  = 33.0 Hz), 129.89 (q,  $J$  = 4.2 Hz), 128.70 (q,  $J$  = 3.9 Hz), 123.43 (q,  $J$  = 272.2 Hz), 118.72;  $^{19}\text{F}$  NMR (376 MHz,  $\text{CD}_3\text{OD}$ )  $\delta$  = -64.35 (s, 3F); LRMS (ESI) calculated for  $\text{C}_{12}\text{H}_6\text{F}_3\text{N}_2\text{O}_2$  [ $\text{M} - \text{H}$ ] $^-$   $m/z$  267.05, found 267.06.

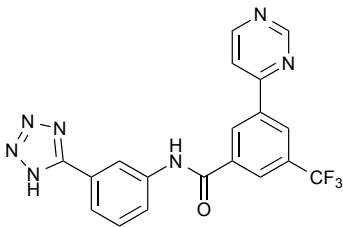

**N-(3-(1H-tetrazol-5-yl)phenyl)-3-(pyrimidin-4-yl)-5-(trifluoromethyl)benzamide (7).** **S9** (80.8 mg, 0.265 mmol, 1.0 equiv) was reacted with 3-(1H-tetrazol-5-yl)aniline in 3 mL DMF according to general procedure B, except 2 equiv *N,N*-diisopropylethylamine (93  $\mu$ L) was used in the first step. **7** (68.8 mg, 63%) obtained as a white solid.  $^1\text{H}$  NMR (400 MHz,  $\text{DMSO}-d_6$ )  $\delta$  = 10.84 (s, 1H), 9.36 (d,  $J$  = 1.0 Hz, 1H), 9.07 (br s, 1H), 9.00 (d,  $J$  = 5.4 Hz, 1H), 8.73 (s, 1H),

8.58 (s, 1H), 8.50 (s, 1H), 8.37 (dd,  $J = 1.2, 5.4$  Hz, 1H), 8.03 (dd,  $J = 1.1, 8.2$  Hz, 1H), 7.80 (d,  $J = 7.8$  Hz, 1H), 7.63 (t,  $J = 8.0$  Hz, 1H);  $^{13}\text{C}$  NMR (100 MHz, DMSO- $d_6$ )  $\delta = 163.76, 160.33, 158.90, 158.70, 155.77, 139.63, 137.60, 136.49, 130.21, 129.90, 130.22$  (q,  $J = 33.0$  Hz), 126.70 (br q,  $J = 3.7$  Hz), 126.40 (br q,  $J = 3.7$  Hz), 124.93, 122.96, 122.48, 123.72 (q,  $J = 272.9$  Hz), 118.91, 117.95;  $^{19}\text{F}$  NMR (376 MHz, DMSO- $d_6$ )  $\delta = -61.16$  (s, 3F); HRMS (ESI) calculated for  $\text{C}_{19}\text{H}_{11}\text{F}_3\text{N}_7\text{O}$   $[\text{M} - \text{H}]^-$   $m/z$  410.0983, found 410.0975.

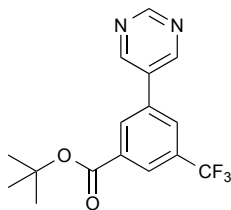

**tert-butyl 3-(pyrimidin-5-yl)-5-(trifluoromethyl)benzoate (S10).** **S1** (100 mg, 0.308 mmol, 1.0 equiv) was reacted with commercially available 5-bromopyrimidine according to general procedure D. **S10** (74.3 mg, 75%) obtained as a white solid.  $^1\text{H}$  NMR (400 MHz,  $\text{CDCl}_3$ )  $\delta = 9.26$  (s, 1H), 9.00 (s, 2H), 8.37 (br s, 1H), 8.30 (br s, 1H), 7.96 (br s, 1H), 1.61 (s, 9H);  $^{13}\text{C}$  NMR (100 MHz,  $\text{CDCl}_3$ )  $\delta = 163.55, 158.37, 154.96, 135.53, 134.21, 132.40, 132.16$  (q,  $J = 33.0$  Hz), 131.06, 127.18 (q,  $J = 3.7$  Hz), 126.53 (q,  $J = 4.2$  Hz), 123.32 (q,  $J = 272.9$  Hz), 82.67, 28.02;  $^{19}\text{F}$  NMR (376 MHz,  $\text{CDCl}_3$ )  $\delta = -62.77$  (s, 3F); LRMS (ESI) calculated for  $\text{C}_{16}\text{H}_{16}\text{F}_3\text{N}_2\text{O}_2$   $[\text{M} + \text{H}]^+$   $m/z$  325.11, found 325.09.

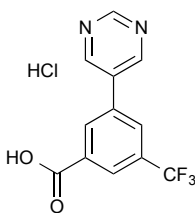

**3-(pyrimidin-5-yl)-5-(trifluoromethyl)benzoic acid hydrochloride (S11).** **S10** (74.3 mg, 0.229 mmol, 1.0 equiv) was reacted according to general procedure C (48h). Semi-crude **S11** (70.1 mg, 100%) obtained as a white solid.  $^1\text{H}$  NMR (400 MHz,  $\text{CD}_3\text{OD}$ , drops  $\text{CDCl}_3$ )  $\delta = 9.36$  (s, 1H), 9.28 (s, 2H), 8.56 (s, 1H), 8.19 (s, 1H), 7.98 (s, 1H);  $^{19}\text{F}$  NMR (376 MHz,  $\text{CD}_3\text{OD}$ , drops  $\text{CDCl}_3$ )  $\delta = -63.56$  (s, 3F); LRMS (ESI) calculated for  $\text{C}_{12}\text{H}_6\text{F}_3\text{N}_2\text{O}_2$   $[\text{M} - \text{H}]^-$   $m/z$  267.05, found 266.99.

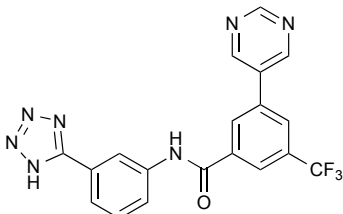

**N-(3-(1H-tetrazol-5-yl)phenyl)-3-(pyrimidin-5-yl)-5-(trifluoromethyl)benzamide (8).** **S11** (70.1 mg, 0.230 mmol, 1.0 equiv) was reacted with 3-(1H-tetrazol-5-yl)aniline in 2.5 mL DMF according to general procedure B, except 2 eq *N,N*-diisopropylethylamine (80.2  $\mu\text{L}$ ) was used in



the first step. **8** (16.5 mg, 17%) obtained as a white solid.  $^1\text{H}$  NMR (400 MHz,  $\text{CD}_3\text{OD}/\text{CD}_3\text{CN}/\text{CDCl}_3$ )  $\delta$  = 10.60 (s, 1H), 10.55 (br s, 2H), 9.91 (br s, 1H), 9.88 - 9.84 (m, 1H), 9.75 (br s, 1H), 9.61 (br s, 1H), 9.29 (br d,  $J$  = 8.3 Hz, 1H), 9.17 (br d,  $J$  = 7.8 Hz, 1H), 8.99 - 8.92 (m, 1H);  $^{13}\text{C}$  NMR (100 MHz,  $\text{CD}_3\text{OD}/\text{CD}_3\text{CN}/\text{CDCl}_3$ )  $\delta$  = 166.15, 159.15, 157.98, 156.69, 140.71, 138.28, 137.25, 133.85, 133.01 (q,  $J$  = 33.0 Hz), 131.22, 128.23 (br q,  $J$  = 3.7 Hz), 126.86, 126.21 (br q,  $J$  = 4.4 Hz), 124.51, 124.33, 120.54;  $^{19}\text{F}$  NMR (376 MHz,  $\text{CD}_3\text{OD}/\text{CD}_3\text{CN}/\text{CDCl}_3$ )  $\delta$  = -62.05 (s, 3F); HRMS (ESI) calculated for  $\text{C}_{19}\text{H}_{11}\text{F}_3\text{N}_7\text{O}$   $[\text{M} - \text{H}]^-$   $m/z$  410.0983, found 410.0976.

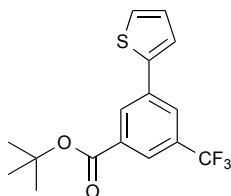

**tert-butyl 3-(thiophen-2-yl)-5-(trifluoromethyl)benzoate (S12).** A 3 mL vial with cap was purged with Ar and charged with **S1** (100 mg, 0.308 mmol, 1.0 equiv), thiophene-2-boronic acid (98 mg, 0.769 mmol, 2.5 equiv), cesium carbonate (251 mg, 0.769 mmol, 2.5 equiv), tetrakis(triphenylphosphine)palladium(0) (21 mg, 0.018 mmol, 0.06 equiv), and dry 1,2-dimethoxyethane (2.5 mL). The reaction mixture was purged again, sealed, and heated at 80 °C for 18h. The crude reaction mixture was transferred to a sep funnel with ~ 75 mL EtOAc and ~ 5 mL water. ~ 50 mL sat.  $\text{NaHCO}_3$  was added, the layers separated, and the organic layer washed with ~ 50 mL water and brine. The EtOAc was dried over  $\text{MgSO}_4$  and concentrated. Purified on a silica column with 0-15% EtOAc:hexanes. **S12** (70.7 mg, 70%) obtained as a glassy solid.  $^1\text{H}$  NMR (400 MHz,  $\text{CDCl}_3$ )  $\delta$  = 8.39 (br s, 1H), 8.13 (br s, 1H), 7.97 (br s, 1H), 7.43 (dd,  $J$  = 1.0, 3.7 Hz, 1H), 7.38 (dd,  $J$  = 1.2, 5.1 Hz, 1H), 7.13 (dd,  $J$  = 3.7, 5.1 Hz, 1H), 1.66 (s, 9H);  $^{13}\text{C}$  NMR (100 MHz,  $\text{CDCl}_3$ )  $\delta$  = 164.09, 141.67, 135.55, 133.55, 131.51 (q,  $J$  = 33.0 Hz), 129.71, 128.33, 126.35, 125.88 (q,  $J$  = 3.7 Hz), 124.68, 124.71 (q,  $J$  = 3.7 Hz), 123.61 (q,  $J$  = 272.9 Hz), 82.23, 28.08;  $^{19}\text{F}$  NMR (376 MHz,  $\text{CDCl}_3$ )  $\delta$  = -62.77 (s, 3F); did not ionize by ESI.

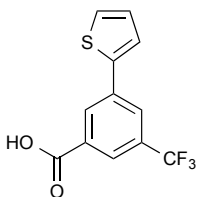

**3-(thiophen-2-yl)-5-(trifluoromethyl)benzoic acid (S13).** **S12** (70.7 mg, 0.215 mmol, 1.0 equiv) was reacted according to general procedure C (48h). Semi-crude **S13** (59.6 mg, 102%) obtained as a white solid.  $^1\text{H}$  NMR (400 MHz,  $\text{CD}_3\text{OD}$ )  $\delta$  = 8.36 (s, 1H), 8.09 (s, 1H), 7.99 (br s, 1H), 7.48 (dd,  $J$  = 1.2, 3.7 Hz, 1H), 7.45 (dd,  $J$  = 1.0, 5.1 Hz, 1H), 7.10 (dd,  $J$  = 3.7, 5.1 Hz, 1H);  $^{13}\text{C}$  NMR (100 MHz,  $\text{CD}_3\text{OD}$ )  $\delta$  = 166.29, 140.95, 135.90, 132.61, 131.32 (q,  $J$  = 33.0 Hz), 129.42, 128.23, 126.35, 125.29 (q,  $J$  = 3.7 Hz), 124.82, 124.23 (q,  $J$  = 3.7 Hz), 123.66 (q,  $J$  = 271.7 Hz);  $^{19}\text{F}$  NMR (376 MHz,  $\text{CD}_3\text{OD}$ )  $\delta$  = -64.35 (s, 3F); LRMS (ESI) calculated for  $\text{C}_{12}\text{H}_6\text{F}_3\text{O}_2\text{S}$   $[\text{M} - \text{H}]^-$   $m/z$  271.01, found 270.93.

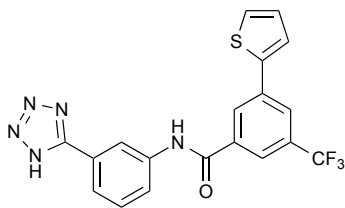

**N-(3-(1*H*-tetrazol-5-yl)phenyl)-3-(thiophen-2-yl)-5-(trifluoromethyl)benzamide (9).** **S13** (59.6 mg, 0.219 mmol, 1.0 equiv) was reacted with 3-(1*H*-tetrazol-5-yl)aniline in 2.5 mL DMF according to general procedure B. **9** (60.9 mg, 67%) obtained as a white solid.  $^1\text{H}$  NMR (400 MHz, DMSO- $d_6$ )  $\delta$  = 10.77 (s, 1H), 8.57 (t,  $J$  = 1.7 Hz, 1H), 8.50 (s, 1H), 8.24 (s, 1H), 8.18 (s, 1H), 8.01 (dd,  $J$  = 1.2, 8.3 Hz, 1H), 7.83 (dd,  $J$  = 1.0, 3.7 Hz, 1H), 7.80 (d,  $J$  = 7.8 Hz, 1H), 7.71 (dd,  $J$  = 1.1, 5.0 Hz, 1H), 7.61 (t,  $J$  = 7.9 Hz, 1H), 7.23 (dd,  $J$  = 3.7, 4.9 Hz, 1H);  $^{13}\text{C}$  NMR (100 MHz, DMSO- $d_6$ )  $\delta$  = 163.83, 156.04, 140.62, 139.56, 136.45, 135.31, 130.25 (d,  $J$  = 32.3 Hz), 129.73, 128.81, 128.34, 127.60, 126.11, 125.34, 124.40 (br d,  $J$  = 4.4 Hz), 122.95 (d,  $J$  = 4.4 Hz), 122.78, 122.40, 123.69 (d,  $J$  = 272.9 Hz), 118.91;  $^{19}\text{F}$  NMR (376 MHz, DMSO- $d_6$ )  $\delta$  = -61.16 (s, 3F); HRMS (ESI) calculated for  $\text{C}_{19}\text{H}_{11}\text{F}_3\text{N}_5\text{OS}$   $[\text{M} - \text{H}]^-$   $m/z$  414.0642, found 414.0634.

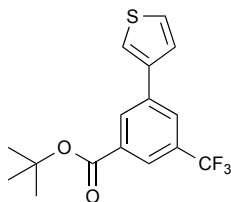

**tert-butyl 3-(thiophen-3-yl)-5-(trifluoromethyl)benzoate (S14).** A 3 mL vial with cap was purged with Ar and charged with **S1** (100 mg, 0.308 mmol, 1.0 equiv), thiophene-3-boronic acid (98 mg, 0.769 mmol, 2.5 equiv), cesium carbonate (251 mg, 0.769 mmol, 2.5 equiv), tetrakis(triphenylphosphine)palladium(0) (21 mg, 0.018 mmol, 0.06 equiv), and dry 1,2-dimethoxyethane (2.5 mL). The reaction mixture was purged again, sealed, and heated at 80 °C for 18h. The crude reaction mixture was transferred to a sep funnel with ~ 75 mL EtOAc and ~ 5 mL water. ~ 50 mL sat.  $\text{NaHCO}_3$  was added, the layers separated, and the organic layer washed with ~ 50 mL water and brine. The EtOAc was dried over  $\text{MgSO}_4$  and concentrated under reduced pressure. Purified on a silica column with 0-15% EtOAc:hexanes. **S14** (90.1 mg, 89%) obtained as a glassy solid.  $^1\text{H}$  NMR (400 MHz,  $\text{CDCl}_3$ )  $\delta$  = 8.39 (br s, 1H), 8.16 (br s, 1H), 7.98 (br s, 1H), 7.59 (dd,  $J$  = 1.8, 2.6 Hz, 1H), 7.45 (d,  $J$  = 1.2 Hz, 1H), 7.44 (s, 1H), 1.66 (s, 9H);  $^{13}\text{C}$  NMR (100 MHz,  $\text{CDCl}_3$ )  $\delta$  = 164.28, 139.96, 136.83, 133.40, 131.36 (q,  $J$  = 32.5 Hz), 130.35, 127.03, 126.55 (q,  $J$  = 3.7 Hz), 125.96, 124.56 (q,  $J$  = 3.7 Hz), 123.73 (q,  $J$  = 272.9 Hz), 122.02, 82.11, 28.09;  $^{19}\text{F}$  NMR (376 MHz,  $\text{CDCl}_3$ )  $\delta$  = -62.67 (s, 3F); did not ionize by ESI.

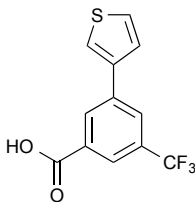

**3-(thiophen-3-yl)-5-(trifluoromethyl)benzoic acid (S15).** **S14** (90.1 mg, 0.274 mmol, 1.0 equiv) was reacted according to general procedure C (48h). Semi-crude **S15** (79.3 mg, 106%) obtained as a white solid.  $^1\text{H}$  NMR (400 MHz,  $\text{CD}_3\text{OD}$ )  $\delta$  = 8.41 (t,  $J$  = 1.3 Hz, 1H), 8.12 - 8.10 (m, 1H), 8.05 - 8.02 (m, 1H), 7.74 (dd,  $J$  = 1.5, 2.9 Hz, 1H), 7.50 - 7.48 (m, 1H), 7.46 - 7.43 (m, 1H);  $^{13}\text{C}$  NMR (100 MHz,  $\text{CD}_3\text{OD}$ )  $\delta$  = 168.34, 141.13, 138.91, 134.07, 132.87 (q,  $J$  = 33.0 Hz), 131.90, 128.59, 127.96 (q,  $J$  = 3.7 Hz), 127.14, 125.78 (q,  $J$  = 4.2 Hz), 123.89, 125.54 (q,  $J$  = 271.7 Hz);  $^{19}\text{F}$  NMR (376 MHz,  $\text{CD}_3\text{OD}$ )  $\delta$  = -64.16 (s, 3F); LRMS (ESI) calculated for  $\text{C}_{12}\text{H}_6\text{F}_3\text{O}_2\text{S}$   $[\text{M} - \text{H}]^-$   $m/z$  271.01, found 270.93.

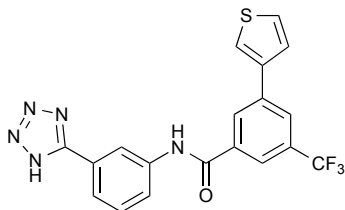

**N-(3-(1H-tetrazol-5-yl)phenyl)-3-(thiophen-3-yl)-5-(trifluoromethyl)benzamide (10).** **S15** (79.3 mg, 0.291 mmol, 1.0 equiv) was reacted with 3-(1H-tetrazol-5-yl)aniline in 2.5 mL DMF according to general procedure B. **10** (97.3 mg, 80%) obtained as a white solid.  $^1\text{H}$  NMR (400 MHz,  $\text{DMSO}-d_6$ )  $\delta$  = 10.74 (s, 1H), 8.61 (s, 1H), 8.58 (t,  $J$  = 1.7 Hz, 1H), 8.28 (s, 1H), 8.23 (dd,  $J$  = 1.3, 2.8 Hz, 1H), 8.21 (s, 1H), 8.04 - 8.00 (m, 1H), 7.83 - 7.78 (m, 2H), 7.76 - 7.72 (m, 1H), 7.62 (t,  $J$  = 8.0 Hz, 1H);  $^{13}\text{C}$  NMR (100 MHz,  $\text{DMSO}-d_6$ )  $\delta$  = 164.16, 155.92, 139.64, 139.15, 136.56, 136.23, 130.10 (q,  $J$  = 31.5 Hz), 129.77, 129.00, 127.73, 126.33, 125.36 (d,  $J$  = 3.2 Hz), 125.10, 123.49, 122.85, 122.71 (d,  $J$  = 3.7 Hz), 123.86 (d,  $J$  = 272.9 Hz), 122.37, 118.88;  $^{19}\text{F}$  NMR (376 MHz,  $\text{DMSO}-d_6$ )  $\delta$  = -60.21 (s, 3F); HRMS (ESI) calculated for  $\text{C}_{19}\text{H}_{11}\text{F}_3\text{N}_5\text{OS}$   $[\text{M} - \text{H}]^-$   $m/z$  414.0642, found 414.0635.

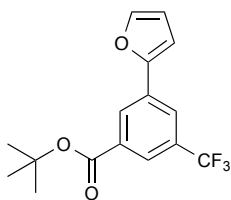

**tert-butyl 3-(furan-2-yl)-5-(trifluoromethyl)benzoate (S16).** **S1** was reacted with commercially available furan-2-ylboronic acid according to general procedure E. Crude product was filtered through a silica gel plug; the plug was washed with hexanes and the product was eluted with  $\text{CH}_2\text{Cl}_2$ . **S16** (31 mg, 50%) obtained as a colorless liquid.  $^1\text{H}$  NMR (400 MHz,  $\text{CDCl}_3$ )  $\delta$  = 8.41 - 8.46 (m, 1H), 8.29 (s, 1H), 8.02 (s, 1H), 7.65 (dd,  $J$  = 5.66, 3.35 Hz, 1H), 7.48 (dd,  $J$  = 5.78, 3.23 Hz, 1H), 1.67 (s, 9H); did not ionize by ESI.

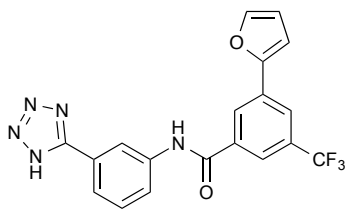

**N-(3-(1*H*-tetrazol-5-yl)phenyl)-3-(furan-2-yl)-5-(trifluoromethyl)benzamide (11).** **S16** (28.3 mg, 0.091 mmol, 1.0 equiv) was reacted according to general procedure F. **11** (21 mg, 58% over two steps) obtained as a white solid.  $^1\text{H}$  NMR (400 MHz, pyridine- $d_5$ )  $\delta$  = 11.71 (br s, 1H), 10.56 (br s, 2H), 9.24 (br s, 1H), 8.35 (br s, 1H), 8.08 - 8.21 (m, 3H), 7.66 (br s, 1H), 6.96 (br d,  $J$  = 1.83 Hz, 1H), 6.54 (br s, 1H);  $^{13}\text{C}$  NMR (100 MHz, pyridine- $d_5$ )  $\delta$  = 166.77, 153.04, 145.23, 142.14, 138.84, 133.62, 132.38 (br d,  $J$  = 31.54 Hz), 131.53, 128.61, 128.12, 124.25, 121.40, 113.94, 109.59;  $^{19}\text{F}$  NMR (376 MHz, pyridine- $d_5$ )  $\delta$  = -62.3 (s, 3F); HRMS (ESI) calculated for  $\text{C}_{19}\text{H}_{11}\text{F}_3\text{N}_5\text{O}_2$  [ $\text{M} - \text{H}$ ] $^-$   $m/z$  398.0870, found 398.0865.

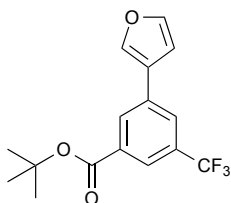

**tert-butyl 3-(furan-3-yl)-5-(trifluoromethyl)benzoate (S17).** **S1** was reacted with commercially available furan-3-ylboronic acid according to general procedure E. Crude product was purified via silica gel with hexanes: $\text{CH}_2\text{Cl}_2$ . **S17** (50.3 mg, 77%) obtained as a colorless liquid.  $^1\text{H}$  NMR (400 MHz,  $\text{CDCl}_3$ )  $\delta$  = 8.27 - 8.29 (m, 1H), 8.12 (s, 1H), 7.86 (d,  $J$  = 0.85 Hz, 2H), 7.54 (t,  $J$  = 1.70 Hz, 1H), 6.78 (dd,  $J$  = 1.70, 0.73 Hz, 1H), 1.65 (s, 9H);  $^{13}\text{C}$  NMR (100 MHz,  $\text{CDCl}_3$ )  $\delta$  = 164.31, 144.28, 139.47, 133.73, 133.43, 131.42 (q,  $J$  = 32.52 Hz), 129.78, 125.73 - 126.14 (m), 124.79, 124.49 (q,  $J$  = 3.67 Hz), 108.56, 82.19, 28.11;  $^{19}\text{F}$  NMR (376 MHz,  $\text{CDCl}_3$ )  $\delta$  = -62.79 (s, 3F); did not ionize by ESI.

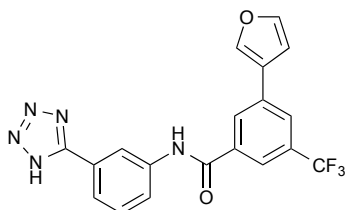

**N-(3-(1*H*-tetrazol-5-yl)phenyl)-3-(furan-3-yl)-5-(trifluoromethyl)benzamide (12).** **S17** (30.5 mg, 0.098 mmol, 1.0 equiv) was reacted according to general procedure F. **12** (39 mg, 50% over two steps) obtained as a white solid.  $^1\text{H}$  NMR (400 MHz, pyridine- $d_5$ )  $\delta$  = 11.82 - 12.21 (m, 2H), 11.65 - 11.75 (m, 1H), 9.22 - 9.33 (m, 1H), 8.59 - 8.69 (m, 1H), 8.37 - 8.46 (m, 1H), 8.10 - 8.32 (m, 4H), 7.70 - 7.80 (m, 1H), 7.15 - 7.35 (m, 2H), 6.92 - 7.03 (m, 1H);  $^{13}\text{C}$  NMR (100 MHz, pyridine- $d_5$ )  $\delta$  = 165.47, 144.69, 140.66, 137.37, 134.23, 131.04, 130.72, 130.02, 129.17, 128.91, 128.42, 127.11, 125.54 (br d,  $J$  = 3.67 Hz), 125.13 (br d,  $J$  = 3.67 Hz), 124.93, 119.86, 108.79;

$^{19}\text{F}$  NMR (376 MHz, pyridine- $d_5$ )  $\delta$  = -62.17 (s, 3F); HRMS (ESI) calculated for  $\text{C}_{19}\text{H}_{11}\text{F}_3\text{N}_5\text{O}_2$   $[\text{M} - \text{H}]^-$   $m/z$  398.0870, found 398.0863.

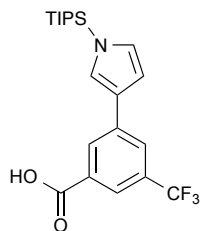

**3-(trifluoromethyl)-5-(1-(triisopropylsilyl)-1H-pyrrol-3-yl)benzoic acid (S18).** Commercially available 3-bromo-5-(trifluoromethyl)benzoic acid (54 mg, 0.20 mmol, 1 equiv) was reacted with commercially available (1-(triisopropylsilyl)-1H-pyrrol-3-yl)boronic acid according to general procedure E. Crude product was loaded onto a plug of C18-silica; the plug was washed with water and the product eluted with MeOH. Crude **S18** was used without further purification. LRMS (ESI) calculated for  $\text{C}_{21}\text{H}_{27}\text{F}_3\text{NO}_2\text{Si}$   $[\text{M} - \text{H}]^-$   $m/z$  410.18, found 410.2.

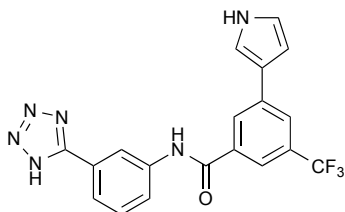

**N-(3-(1H-tetrazol-5-yl)phenyl)-3-(1H-pyrrol-3-yl)-5-(trifluoromethyl)benzamide (13).** Crude **S18** was taken up in 1.0 mL of a 1M tetrabutylammonium fluoride solution in THF. The reaction was stirred until complete by TLC (ca. 2 hr), then concentrated. The resulting crude 3-(1H-pyrrol-3-yl)-5-(trifluoromethyl)benzoic acid was reacted according to general procedure F. **13** (12 mg, 15% over three steps) obtained as a white solid.  $^1\text{H}$  NMR (400 MHz, pyridine- $d_5$ )  $\delta$  = 12.17 - 12.39 (m, 1H), 11.57 - 11.72 (m, 1H), 9.23 (br s, 1H), 8.14 - 8.42 (m, 5H), 6.75 - 6.91 (m, 2H);  $^{19}\text{F}$  NMR (376 MHz, pyridine- $d_5$ )  $\delta$  = -62.11 (s, 3F); HRMS (ESI) calculated for  $\text{C}_{19}\text{H}_{12}\text{F}_3\text{N}_6\text{O}$   $[\text{M} - \text{H}]^-$   $m/z$  397.1030, found 397.1023.

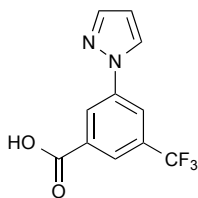

**3-(1H-pyrazol-1-yl)-5-(trifluoromethyl)benzoic acid (S19).** Commercially available 3-bromo-5-(trifluoromethyl)benzoic acid (54 mg, 0.20 mmol, 1 equiv),  $\text{K}_2\text{CO}_3$  (155 mg, 1.1 mmol, 5.6 equiv), and *N,N*-dimethylglycine hydrochloride (45 mg, 0.3 mmol, 1.6 equiv) were suspended in 0.5 mL of dry DMSO. Argon was bubbled through the resulting solution to remove oxygen before copper(I) iodide (30 mg, 0.2 mmol, 0.8 equiv) and pyrazole (18 mg, 0.3 mmol, 1.3 equiv) were added to the reaction mixture. The reaction was then warmed to 100  $^\circ\text{C}$  and stirred for 18h. The reaction mixture was allowed to cool to room temperature, diluted with MeOH, and filtered

through celite. Crude **S19** was used without further purification. LRMS (ESI) calculated for  $C_{11}H_6F_3N_2O_2$   $[M - H]^-$   $m/z$  255.05, found 254.97.

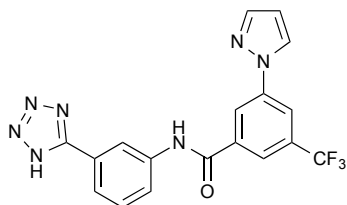

**N-(3-(1H-tetrazol-5-yl)phenyl)-3-(1H-pyrazol-1-yl)-5-(trifluoromethyl)benzamide (14).**

Crude **S19** was reacted according to general procedure F. **14** (17 mg, 21% over two steps) obtained as a white solid.  $^1H$  NMR (400 MHz, pyridine- $d_5$ )  $\delta$  = 11.76 (br d,  $J$  = 13.15 Hz, 1H), 9.23 (br d,  $J$  = 12.90 Hz, 1H), 8.91 (br d,  $J$  = 13.27 Hz, 1H), 8.50 - 8.57 (m, 1H), 8.27 - 8.45 (m, 3H), 8.09 - 8.24 (m, 3H), 7.91 (br d,  $J$  = 13.76 Hz, 1H), 6.57 (br d,  $J$  = 12.66 Hz, 1H);  $^{13}C$  NMR (100 MHz, pyridine- $d_5$ )  $\delta$  = 164.87, 142.05, 140.95, 140.51, 138.19, 131.34 (d,  $J$  = 33.01 Hz), 130.00, 127.86, 127.38, 123.20, 121.84 - 122.04 (m), 121.49, 119.91, 117.97 (d,  $J$  = 2.93 Hz), 108.81;  $^{19}F$  NMR (376 MHz, pyridine- $d_5$ )  $\delta$  = -62.33 (s, 3F); HRMS (ESI) calculated for  $C_{18}H_{11}F_3N_7O$   $[M - H]^-$   $m/z$  398.0983, found 398.0976.

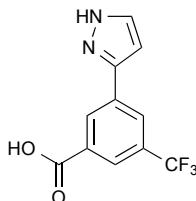

**3-(1H-pyrazol-3-yl)-5-(trifluoromethyl)benzoic acid (S20).** Commercially available 3-bromo-5-(trifluoromethyl)benzoic acid (54 mg, 0.20 mmol, 1 equiv) was reacted with commercially available (1H-pyrazol-3-yl)boronic acid according to general procedure E. Crude product was loaded onto a plug of C18-silica; the plug was washed with water and the product eluted with MeOH. Crude **S20** was used without further purification. LRMS (ESI) calculated for  $C_{11}H_6F_3N_2O_2$   $[M - H]^-$   $m/z$  255.05, found 254.97.

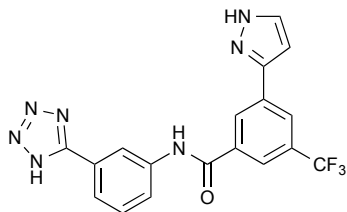

**N-(3-(1H-tetrazol-5-yl)phenyl)-3-(1H-pyrazol-5-yl)-5-(trifluoromethyl)benzamide (15).**

Crude **S20** was reacted according to general procedure F. **15** (1.4 mg, 1.8% over two steps) obtained as a white solid.  $^1H$  NMR (400 MHz, acetone- $d_6$ )  $\delta$  = 8.63 (br d,  $J$  = 15.22 Hz, 2H), 8.33 (br s, 2H), 8.18 (s, 2H), 8.07 - 8.12 (m, 1H), 7.94 (br d,  $J$  = 7.79 Hz, 1H), 7.58 (t,  $J$  = 7.97 Hz, 1H);  $^{19}F$  NMR (376 MHz, acetone- $d_6$ )  $\delta$  = -63.14 (s, 3F); HRMS (ESI) calculated for  $C_{18}H_{11}F_3N_7O$   $[M - H]^-$   $m/z$  398.0983, found 398.0977.

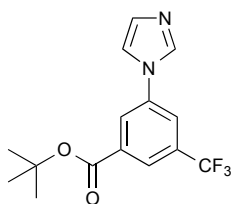

**tert-butyl 3-(1*H*-imidazol-1-yl)-5-(trifluoromethyl)benzoate (S21).** A 3 mL vial with cap was purged with Ar and charged with **S1** (100 mg, 0.308 mmol, 1.0 equiv), imidazole (27 mg, 0.400 mmol, 1.3 equiv), potassium carbonate (238 mg, 1.72 mmol, 5.6 equiv), copper(I) iodide (47 mg, 0.246 mmol, 0.8 equiv), and *N,N*-dimethylglycine hydrochloride (69 mg, 0.492 mmol, 1.6 equiv). The vial was purged with Ar; dry dimethyl sulfoxide (1.5 mL) was then added, and the vial was sealed and heated at 120 °C for 18h. The crude reaction mixture was transferred to a sep funnel with ~ 75 mL EtOAc and ~10 mL water. ~ 50 mL sat. NaHCO<sub>3</sub> was added, the layers separated, and the organic layer washed with ~ 40 mL water and brine. The organic layer was dried over MgSO<sub>4</sub> and concentrated under reduced pressure. Purified on a silica column with 0-60% EtOAc:hexanes. **S21** (34.7 mg, 36%) obtained as a white solid. <sup>1</sup>H NMR (400 MHz, CDCl<sub>3</sub>) δ = 8.20 (s, 1H), 8.19 (br d, *J* = 1.9 Hz, 1H), 7.94 (s, 1H), 7.79 (br s, 1H), 7.36 (t, *J* = 1.3 Hz, 1H), 7.26 (br s, 1H), 1.63 (s, 9H); <sup>13</sup>C NMR (100 MHz, CDCl<sub>3</sub>) δ = 163.08, 137.94, 135.47, 135.02, 132.70 (q, *J* = 33.5 Hz), 131.30, 125.16, 124.85 (q, *J* = 3.7 Hz), 121.51 (q, *J* = 3.7 Hz), 122.97 (q, *J* = 272.9 Hz), 117.97, 83.02, 28.02; <sup>19</sup>F NMR (376 MHz, CDCl<sub>3</sub>) δ = -62.84 (s, 3F); LRMS (ESI) calculated for C<sub>15</sub>H<sub>16</sub>F<sub>3</sub>N<sub>2</sub>O<sub>2</sub> [M + H]<sup>+</sup> *m/z* 313.11, found 313.01.

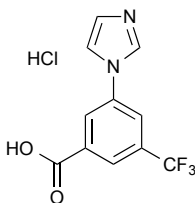

**3-(1*H*-imidazol-1-yl)-5-(trifluoromethyl)benzoic acid hydrochloride (S22).** **S21** (34.7 mg, 0.111 mmol, 1.0 equiv) was reacted according to general procedure C (24h). Semi-crude **S22** (33.8 mg, 104%) obtained as a white solid. <sup>1</sup>H NMR (400 MHz, CD<sub>3</sub>OD) δ = 9.70 (s, 1H), 8.62 (s, 1H), 8.46 (s, 1H), 8.41 (s, 1H), 8.25 (s, 1H), 7.84 (br s, 1H); <sup>13</sup>C NMR (100 MHz, CD<sub>3</sub>OD) δ = 164.90, 136.16, 135.26, 134.52, 132.63 (q, *J* = 34.2 Hz), 127.16 (q, *J* = 3.7 Hz), 127.04, 123.63 (q, *J* = 3.7 Hz), 122.98 (d, *J* = 272.2 Hz), 121.59, 120.90; <sup>19</sup>F NMR (376 MHz, CD<sub>3</sub>OD) δ = -64.15 (s, 3F); LRMS (ESI) calculated for C<sub>11</sub>H<sub>6</sub>F<sub>3</sub>N<sub>2</sub>O<sub>2</sub> [M - H]<sup>-</sup> *m/z* 255.05, found 255.06.

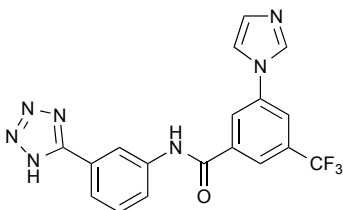

**N-(3-(1*H*-tetrazol-5-yl)phenyl)-3-(1*H*-imidazol-1-yl)-5-(trifluoromethyl)benzamide (16).** **S22** (33.8 mg, 0.115 mmol, 1.0 equiv) was reacted with 3-(1*H*-tetrazol-5-yl)aniline in 2 mL DMF according to general procedure B, except 2 eq *N,N*-diisopropylethylamine (40  $\mu$ L) was used in the first step. **16** (30.2 mg, 66%) obtained as a white solid.  $^1\text{H}$  NMR (400 MHz, DMSO- $d_6$ )  $\delta$  = 10.77 (s, 1H), 8.55 (s, 3H), 8.32 (s, 1H), 8.26 (s, 1H), 8.03 (s, 1H), 8.00 (dd,  $J$  = 1.2, 8.3 Hz, 1H), 7.80 (d,  $J$  = 7.8 Hz, 1H), 7.61 (t,  $J$  = 7.9 Hz, 1H), 7.20 (s, 1H);  $^{13}\text{C}$  NMR (100 MHz, DMSO- $d_6$ )  $\delta$  = 163.91, 156.70, 139.94, 138.21, 137.84, 136.59 (br s), 131.36 (d,  $J$  = 32.3 Hz), 130.83, 130.31, 126.17, 123.83, 123.03, 122.96, 122.93 - 122.78 (m), 123.91 (d,  $J$  = 272.9 Hz), 120.46 - 120.30 (m), 119.25, 118.77;  $^{19}\text{F}$  NMR (376 MHz, DMSO- $d_6$ )  $\delta$  = -61.02 (s, 3F); HRMS (ESI) calculated for  $\text{C}_{18}\text{H}_{11}\text{F}_3\text{N}_7\text{O}$  [ $\text{M} - \text{H}$ ] $^-$   $m/z$  398.0983, found 398.0976.

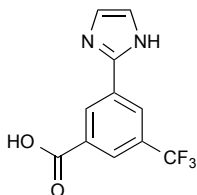

**3-(1*H*-imidazol-2-yl)-5-(trifluoromethyl)benzoic acid (S23).** A 3 mL vial with cap/septa was purged with Ar and charged with imidazole (22 mg, 0.323 mmol, 1.0 equiv), palladium(II) acetate (4 mg, 0.016 mmol, 0.05 equiv), copper(I) iodide (123 mg, 0.646 mmol, 2.0 equiv), and **S1** (210 mg, 0.646 mmol, 2.0 equiv). The vial was purged with Ar and charged with 1.62 mL degassed DMF (Ar bubbling for 30 min). The vial was sealed and heated at 140  $^\circ\text{C}$  for 48h. After cooling to rt, the reaction mixture was filtered through a nylon 0.2  $\mu\text{m}$  syringe filter and purified by reverse phase HPLC (water/MeOH/0.05% formic acid) to afford the desired product. **S23** (15.9 mg, 19%) obtained as a light blue solid.  $^1\text{H}$  NMR (400 MHz,  $\text{CD}_3\text{OD}$ , drops  $\text{CDCl}_3$ )  $\delta$  = 8.80 (br s, 1H), 8.40 (br s, 1H), 8.27 (br s, 1H), 7.33 (br s, 2H);  $^{19}\text{F}$  NMR (376 MHz,  $\text{CD}_3\text{OD}$ , drops  $\text{CDCl}_3$ )  $\delta$  = -64.29 (s, 3F); LRMS (ESI) calculated for  $\text{C}_{11}\text{H}_6\text{F}_3\text{N}_2\text{O}_2$  [ $\text{M} - \text{H}$ ] $^-$   $m/z$  255.05, found 255.11.

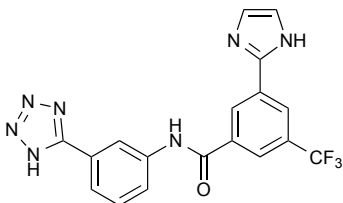

**N-(3-(1*H*-tetrazol-5-yl)phenyl)-3-(1*H*-imidazol-2-yl)-5-(trifluoromethyl)benzamide (17).** **S23** (15.9 mg, 0.062 mmol, 1.0 equiv) was reacted with 3-(1*H*-tetrazol-5-yl)aniline in 2.5 mL DMF according to general procedure A, except 3 eq *N,N*-diisopropylethylamine (32  $\mu$ L) was used. **17** (14.1 mg, 57%) obtained as a white solid.  $^1\text{H}$  NMR (400 MHz, DMSO- $d_6$ )  $\delta$  = 10.73 (br s, 1H), 8.85 (br s, 1H), 8.48 (br s, 2H), 8.29 (s, 1H), 7.92 (br d,  $J$  = 7.8 Hz, 1H), 7.82 (br s, 1H), 7.48 (br s, 1H), 7.27 (br s, 2H);  $^{19}\text{F}$  NMR (376 MHz, DMSO- $d_6$ )  $\delta$  = -61.20 (s, 3F); HRMS (ESI) calculated for  $\text{C}_{18}\text{H}_{11}\text{F}_3\text{N}_7\text{O}$  [ $\text{M} - \text{H}$ ] $^-$   $m/z$  398.0983, found 398.0979.



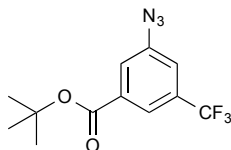

**tert-butyl 3-azido-5-(trifluoromethyl)benzoate (S24).** A 3 mL vial with cap was purged with Ar and charged with **S1** (125 mg, 0.384 mmol, 1.0 equiv), sodium azide (50 mg, 0.769 mmol, 2.0 equiv), copper(I) iodide (7.3 mg, 0.038 mmol, 0.1 equiv), sodium ascorbate (3.8 mg, 0.019 mmol, 0.05 equiv), and *N,N'*-dimethylethylenediamine (6.2 ul, 0.058 mmol, 0.15 equiv). Ethanol (1.28 ml) and water (550 ul) were then added; the vial was purged with Ar, sealed, and heated at 80 °C for 3h. The crude reaction mixture was then transferred to a sep funnel with ~ 75 mL EtOAc and ~ 30 mL water. The aqueous layer was basified by the addition of ~ 20 mL sat. NaHCO<sub>3</sub>; the layers were separated, and the organic layer was further extracted with ~ 50 mL water and brine. The organic layer was dried over MgSO<sub>4</sub> and concentrated to an oil. Purified on a silica column with 0-10% EtOAc:hexanes. Product containing fractions were combined and carefully rotovapped. (**Note:** Product is moderately volatile) **S24** (93.7 mg, 85%) obtained as a light yellow oil. <sup>1</sup>H NMR (400 MHz, CDCl<sub>3</sub>) δ = 7.98 (s, 1H), 7.83 (br s, 1H), 7.38 (br s, 1H), 1.62 (s, 9H); <sup>13</sup>C NMR (100 MHz, CDCl<sub>3</sub>) δ = 163.44, 141.48, 134.72, 132.49 (q, *J* = 33.5 Hz), 122.83, 122.47 (q, *J* = 4.2 Hz), 119.51 (q, *J* = 3.7 Hz), 123.15 (q, *J* = 272.9 Hz), 82.62, 28.04; <sup>19</sup>F NMR (376 MHz, CDCl<sub>3</sub>) δ = -63.00 (s, 3F); did not ionize by ESI.

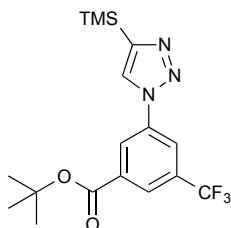

**tert-butyl 3-(trifluoromethyl)-5-(4-(trimethylsilyl)-1H-1,2,3-triazol-1-yl)benzoate (S25).** A 3 mL vial was charged with **S24** (93.7 mg, 0.326 mmol, 1.0 equiv), ethynyltrimethylsilane (1.153 mL, 8.16 mmol, 25.0 equiv), copper(I) Iodide (186 mg, 0.979 mmol, 3.0 equiv), and *N,N*-diisopropylethylamine (511 ul, 2.94 mmol, 9.0 equiv). 1.76 mL dry THF was then added, and the vial was sealed and heated at 80 °C overnight. The crude reaction mixture was filtered, and the filtrand was washed with ~ 50 mL cold THF. The filtrate was concentrated under reduced pressure, affording crude **S25** (168.4 mg, 134%) as a light brown solid. LRMS (ESI) calculated for C<sub>17</sub>H<sub>22</sub>F<sub>3</sub>N<sub>3</sub>O<sub>2</sub>Si [M + H]<sup>+</sup> *m/z* 386.14, found 386.01.

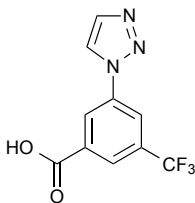

**3-(1H-1,2,3-triazol-1-yl)-5-(trifluoromethyl)benzoic acid (S26).** Crude **S25** (168.4 mg) was reacted according to general procedure C (32h), except after the *t*-butyl was removed by LCMS,

4 mL water was added, and the reaction mixture was heated at 40 °C for an additional 16h. The reaction mixture was then transferred to a sep funnel with ~ 75 mL EtOAc and ~ 30 mL water. The aqueous layer was basified by the addition of ~ 30 mL sat. NaHCO<sub>3</sub>; the layers were separated, and the aqueous layer was acidified to pH 1 with concentrated HCl. The aqueous layer was further extracted with 3 x 50 mL EtOAc. The new organic layers were combined, dried over MgSO<sub>4</sub>, and concentrated. Semi-crude **S26** (36.8 mg, 44% over two steps) obtained as a white solid. <sup>1</sup>H NMR (400 MHz, CD<sub>3</sub>OD, drops CDCl<sub>3</sub>) δ = 8.73 (s, 1H), 8.70 (s, 1H), 8.42 (s, 1H), 8.33 (s, 1H), 7.93 (s, 1H); <sup>13</sup>C NMR (100 MHz, CD<sub>3</sub>OD, drops CDCl<sub>3</sub>) δ = 166.89, 139.35, 137.41, 133.91 (q, *J* = 33.7 Hz), 127.38 (q, *J* = 3.7 Hz), 125.87, 124.68, 124.19, 122.31 (q, *J* = 3.7 Hz), 124.69 (q, *J* = 272.2 Hz); <sup>19</sup>F NMR (376 MHz, CD<sub>3</sub>OD, drops CDCl<sub>3</sub>) δ = -64.16 (s, 3F); LRMS (ESI) calculated for C<sub>10</sub>H<sub>5</sub>F<sub>3</sub>N<sub>3</sub>O<sub>2</sub> [M - H]<sup>-</sup> m/z 256.04, found 256.05.

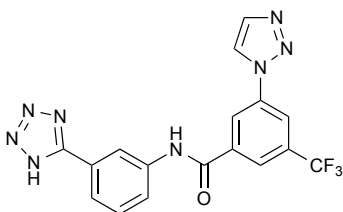

**N-(3-(1H-tetrazol-5-yl)phenyl)-3-(1H-1,2,3-triazol-1-yl)-5-(trifluoromethyl)benzamide (18).** **S26** (36.8 mg, 0.143 mmol, 1.0 equiv) was reacted with 3-(1H-tetrazol-5-yl)aniline in 2.5 mL DMF according to general procedure B. **18** (28.0 mg, 49%) obtained as a white solid. <sup>1</sup>H NMR (400 MHz, DMSO-d<sub>6</sub>, drops EtOAc) δ = 10.85 (s, 1H), 9.12 (s, 1H), 8.88 (s, 1H), 8.53 (s, 2H), 8.45 (s, 1H), 8.08 (s, 1H), 7.97 (br d, *J* = 7.5 Hz, 1H), 7.81 (br s, 1H), 7.56 (br t, *J* = 6.6 Hz, 1H); <sup>13</sup>C NMR (100 MHz, DMSO-d<sub>6</sub>, drops EtOAc) δ = 163.03, 156.04, 139.26, 137.48, 137.39, 134.92, 130.81 (q, *J* = 33.8 Hz), 129.55, 127.54 (br), 124.10 (br d, *J* = 2.9 Hz), 123.92, 123.28, 122.42 (br d, *J* = 2.9 Hz), 123.34 (d, *J* = 272.9 Hz), 121.76, 119.63 (br d, *J* = 2.2 Hz), 118.71 (br); <sup>19</sup>F NMR (376 MHz, DMSO-d<sub>6</sub>, drops EtOAc) δ = -61.14 (s, 3F); HRMS (ESI) calculated for C<sub>17</sub>H<sub>10</sub>F<sub>3</sub>N<sub>8</sub>O [M - H]<sup>-</sup> m/z 399.0935, found 399.0928.

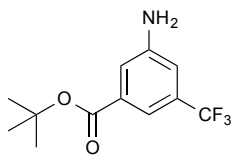

**tert-butyl 3-amino-5-(trifluoromethyl)benzoate (S27).** **S1** (250 mg, 0.769 mmol, 1.0 equiv), copper(I) iodide (29 mg, 0.154 mmol, 0.2 equiv), potassium carbonate (319 mg, 2.31 mmol, 3.0 equiv), and trans-4-hydroxy-L-proline (40 mg, 0.308 mmol, 0.4 equiv) were added to a teflon screw capped vial. dimethyl sulfoxide (3 mL) and 30.0% ammonium hydroxide (1.500 mL, 13.5 mmol, 17.6 equiv) were added, and the reaction mixture was sealed and heated at 70 °C for 18h (**Note:** The solution began to degass upon addition of NH<sub>4</sub>OH – seal the vessel quickly). The reaction mixture was transferred to a sep funnel with ~ 75 mL water and ~ 40 mL EtOAc. The layers were separated, and the aqueous layer was further extracted with 2 x 40 mL EtOAc. The organic layers were combined, dried over MgSO<sub>4</sub>, and concentrated to give colorless oil. Purified on a silica column with 0-15% EtOAc:hexanes. **S27** (46.5 mg, 23%) obtained as a colorless oil. <sup>1</sup>H NMR (400 MHz, CDCl<sub>3</sub>) δ = 7.58 (s, 1H), 7.44 (s, 1H), 7.02 (s, 1H), 1.59 (s, 9H); <sup>13</sup>C NMR

(100 MHz, CDCl<sub>3</sub>)  $\delta$  = 164.68, 146.90, 133.83, 131.69 (q,  $J$  = 32.3 Hz), 123.78 (q,  $J$  = 272.2 Hz), 118.53, 115.87 (q,  $J$  = 4.4 Hz), 114.68 (q,  $J$  = 4.2 Hz), 81.69, 28.07; <sup>19</sup>F NMR (376 MHz, CDCl<sub>3</sub>)  $\delta$  = -62.97 (s, 3F); LRMS (ESI) calculated for C<sub>12</sub>H<sub>15</sub>F<sub>3</sub>NO<sub>2</sub> [M + H]<sup>+</sup>  $m/z$  262.10, found 261.97.

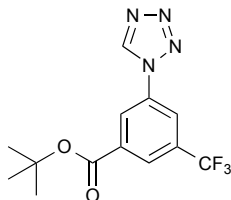

**tert-butyl 3-(1H-tetrazol-1-yl)-5-(trifluoromethyl)benzoate (S28).** A 3 mL vial was charged with **S27** (46.5 mg, 0.178 mmol, 1.0 equiv). The vial was backfilled with Ar and charged with triethyl orthoformate (148  $\mu$ L, 0.890 mmol, 5.0 equiv), sodium azide (58 mg, 0.890 mmol, 5.0 equiv), and glacial acetic acid (1 mL). The reaction mixture was sealed and heated at 100 °C for 3h, then transferred to a sep funnel with ~ 75 mL water and ~ 40 mL EtOAc. The layers were separated, and the aqueous layer was further extracted with 2 x 40 mL EtOAc. The organic layers were combined, dried over MgSO<sub>4</sub>, and concentrated to give colorless oil. Purified on silica gel with 0-15% EtOAc:hexanes. **S28** (33.4 mg, 60%) obtained as a white solid. <sup>1</sup>H NMR (400 MHz, CDCl<sub>3</sub>)  $\delta$  = 9.22 (s, 1H), 8.49 (br s, 1H), 8.37 (s, 1H), 8.23 (s, 1H), 1.64 (s, 9H); <sup>13</sup>C NMR (100 MHz, CDCl<sub>3</sub>)  $\delta$  = 162.49, 140.57, 135.48, 134.38, 133.21 (q,  $J$  = 34.0 Hz), 127.35 (q,  $J$  = 3.7 Hz), 124.74, 121.66 (q,  $J$  = 3.7 Hz), 122.66 (q,  $J$  = 273.4 Hz), 83.61, 28.01; <sup>19</sup>F NMR (376 MHz, CDCl<sub>3</sub>)  $\delta$  = -62.92 (s, 3F); LRMS (ESI) calculated for C<sub>13</sub>H<sub>14</sub>F<sub>3</sub>N<sub>4</sub>O<sub>2</sub> [M + H]<sup>+</sup>  $m/z$  315.10, found 315.06.

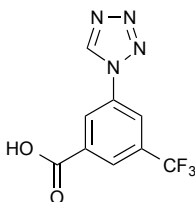

**3-(1H-tetrazol-1-yl)-5-(trifluoromethyl)benzoic acid (S29).** **S28** (33.4 mg, 0.106 mmol, 1.0 equiv) was reacted according to general procedure C (48h). Semi-crude **S29** (30.0 mg, 109%) obtained as an off-white solid. <sup>1</sup>H NMR (400 MHz, CD<sub>3</sub>OD)  $\delta$  = 9.98 (s, 1H), 8.74 (s, 1H), 8.48 (s, 1H), 8.40 (s, 1H); <sup>13</sup>C NMR (100 MHz, CD<sub>3</sub>OD)  $\delta$  = 166.54, 143.46, 136.67, 135.85, 133.96 (q,  $J$  = 34.2 Hz), 128.10 (q,  $J$  = 3.7 Hz), 126.66, 123.14 (q,  $J$  = 3.2 Hz), 124.59 (q,  $J$  = 272.2 Hz); <sup>19</sup>F NMR (376 MHz, CD<sub>3</sub>OD)  $\delta$  = -64.39 (s, 3F); LRMS (ESI) calculated for C<sub>9</sub>H<sub>4</sub>F<sub>3</sub>N<sub>4</sub>O<sub>2</sub> [M - H]<sup>-</sup>  $m/z$  257.04, found 257.04.

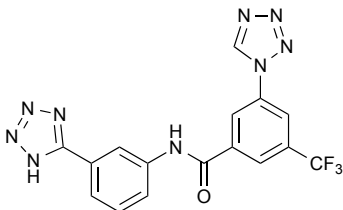

**N-(3-(1*H*-tetrazol-5-yl)phenyl)-3-(1*H*-tetrazol-1-yl)-5-(trifluoromethyl)benzamide (19).** **S29** (30.0 mg, 0.116 mmol, 1.0 equiv) was reacted with 3-(1*H*-tetrazol-5-yl)aniline in 2 mL DMF according to general procedure B. **21** (22.1 mg, 47%) obtained as a white solid. <sup>1</sup>H NMR (400 MHz, CD<sub>3</sub>OD, drops CD<sub>3</sub>CN) δ = 9.52 (s, 1H), 8.53 (s, 1H), 8.34 (s, 1H), 8.29 (s, 1H), 8.23 (s, 1H), 7.75 (dd, *J* = 1.2, 8.0 Hz, 1H), 7.65 (d, *J* = 7.8 Hz, 1H), 7.43 (t, *J* = 8.0 Hz, 1H); <sup>13</sup>C NMR (100 MHz, CD<sub>3</sub>OD, drops CD<sub>3</sub>CN) δ = 164.82, 157.96, 143.39, 140.43, 139.27, 136.29, 133.36 (q, *J* = 33.7 Hz), 131.17, 127.04, 126.57 (q, *J* = 3.4 Hz), 125.43, 124.35, 124.24, 124.52 (d, *J* = 272.2 Hz), 122.40 (q, *J* = 3.7 Hz), 120.32; <sup>19</sup>F NMR (CD<sub>3</sub>OD, drops CD<sub>3</sub>CN) δ = -62.20 (s, 3F); HRMS (ESI) calculated for C<sub>16</sub>H<sub>9</sub>F<sub>3</sub>N<sub>9</sub>O [M - H]<sup>-</sup> m/z 400.0888, found 400.0881.

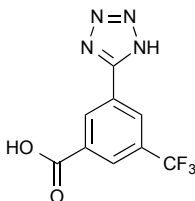

**3-(1*H*-tetrazol-5-yl)-5-(trifluoromethyl)benzoic acid (S30).** A 15 mL sealed tube was backfilled with argon and charged with commercially available 3-cyano-5-(trifluoromethyl)benzoic acid (100 mg, 0.465 mmol, 1.0 equiv), sodium azide (91 mg, 1.40 mmol, 3.0 equiv), and ammonium chloride (81 mg, 1.63 mmol, 3.5 equiv). 4 mL DMF was then used to wash the walls/seal area; the tube was flushed with Ar, sealed, and stirred at 100 °C for 18h. The crude reaction mixture was transferred to a sep funnel with ~ 75 mL H<sub>2</sub>O and EtOAc, and the aqueous layer was adjusted to pH 1 with conc. HCl. The layers were separated, and the aqueous layer was further extracted with 2 x 30 mL EtOAc. The organics were combined, dried over MgSO<sub>4</sub>, and concentrated, giving brown oil. Dried on hivac overnight. The remaining residue was rotovaped with 2 x 10 mL portions of toluene and dried under hivac again, yielding semi-crude **S30** (129.7 mg, 108%) as a brown solid. <sup>1</sup>H NMR (400 MHz, CD<sub>3</sub>OD) δ = 8.80 (s, 1H), 8.46 (s, 1H), 8.30 (s, 1H); <sup>13</sup>C NMR (100 MHz, CD<sub>3</sub>OD) δ = 167.01, 158.00, 134.66, 133.11 (q, *J* = 33.0 Hz), 132.41, 129.29 (br d, *J* = 3.7 Hz), 128.49 (br d, *J* = 3.7 Hz), 128.33, 124.83 (q, *J* = 272.2 Hz); <sup>19</sup>F NMR (376 MHz, CD<sub>3</sub>OD) δ = -64.41 (s, 3F); LRMS (ESI) calculated for C<sub>9</sub>H<sub>4</sub>F<sub>3</sub>N<sub>4</sub>O<sub>2</sub> [M - H]<sup>-</sup> m/z 257.04, found 257.04.

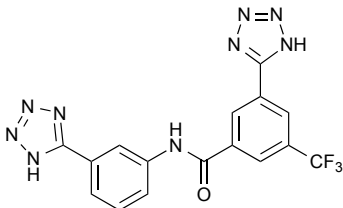

**N-(3-(1*H*-tetrazol-5-yl)phenyl)-3-(1*H*-tetrazol-5-yl)-5-(trifluoromethyl)benzamide (20).** **S30** (130 mg, 0.502 mmol, 1.0 equiv) was reacted with 3-(1*H*-tetrazol-5-yl)aniline in 3 mL DMF according to general procedure A. **22** (122.7 mg, 61%) obtained as a light tan solid. <sup>1</sup>H NMR (400 MHz, CD<sub>3</sub>OD) δ = 8.82 (s, 1H), 8.45 (br s, 1H), 8.44 (t, *J* = 1.8 Hz, 1H), 8.35 (s, 1H), 7.82 (dt, *J* = 8.2, 1.0 Hz, 1H), 7.72 - 7.67 (m, 1H), 7.48 (t, *J* = 7.9 Hz, 1H); <sup>13</sup>C NMR (100 MHz, CD<sub>3</sub>OD) δ = 166.17, 158.70, 157.72, 140.86, 138.41, 133.14 (q, *J* = 33.0 Hz), 131.12, 131.01,

128.91, 127.75 - 127.47 (m), 126.25, 124.87, 124.34, 125.02 (d,  $J = 272.2$  Hz), 120.71;  $^{19}\text{F}$  NMR (376 MHz,  $\text{CD}_3\text{OD}$ )  $\delta = -64.25$  (s, 3F); HRMS (ESI) calculated for  $\text{C}_{16}\text{H}_9\text{F}_3\text{N}_9\text{O}$   $[\text{M} - \text{H}]^-$   $m/z$  400.0888, found 400.0882.

## HRMS Spectra

### Compound 2:

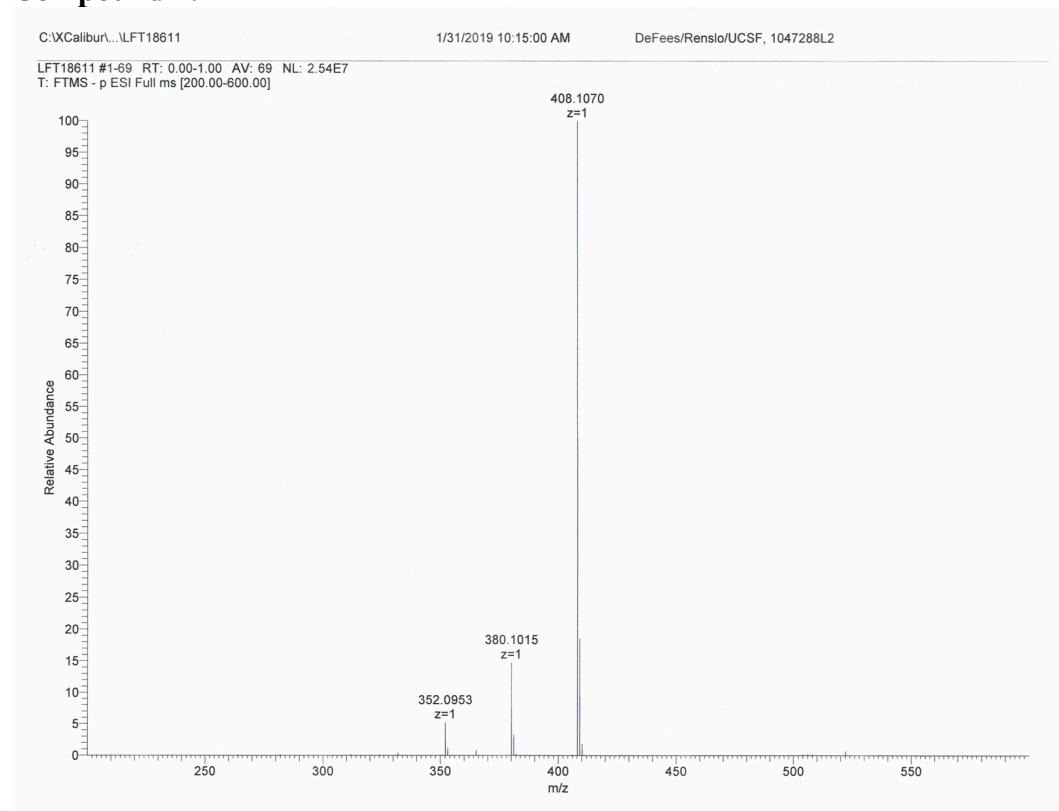

## Compound 3:

C:\XCalibur\...LFT18612

1/31/2019 10:32:21 AM

DeFees/Renslo/UCSF, 1047284L2

LFT18612 #1-68 RT: 0.00-0.99 AV: 68 NL: 2.95E7  
T: FTMS - p ESI Full ms [200.00-600.00]

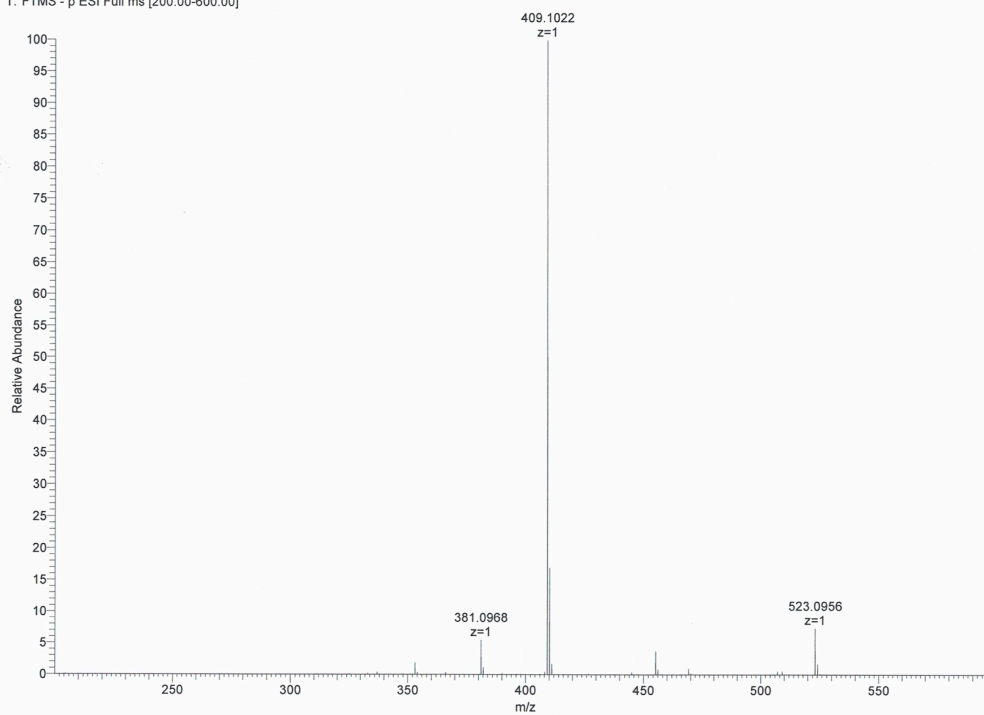

## Compound 4:

C:\XCalibur\...LFT18614

1/31/2019 10:47:54 AM

DeFrees/Renslo/UCSF, 1047285L2

LFT18614 #2-44 RT: 0.02-0.64 AV: 43 NL: 2.47E7  
T: FTMS - p ESI Full ms [200.00-600.00]

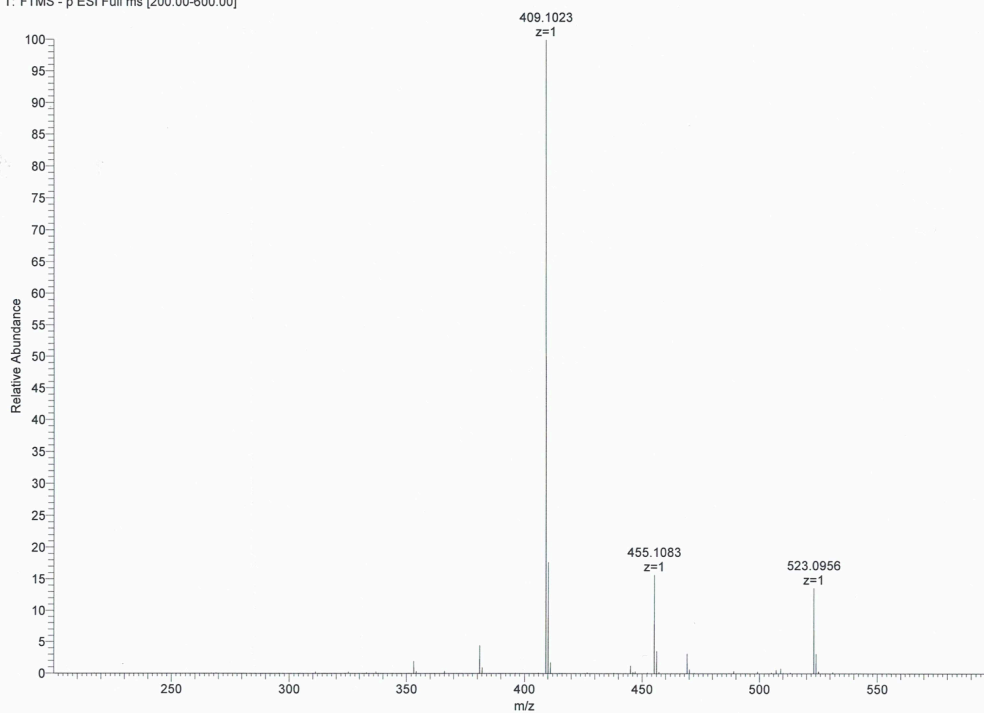

## Compound 5:

C:\XCalibur\LFT18616

1/31/2019 11:06:29 AM

DeFrees/Renslo/UCSF, 1047286L2

LFT18616 #1-39 RT: 0.01-0.57 AV: 39 NL: 2.58E7  
T: FTMS - p ESI Full ms [200.00-600.00]

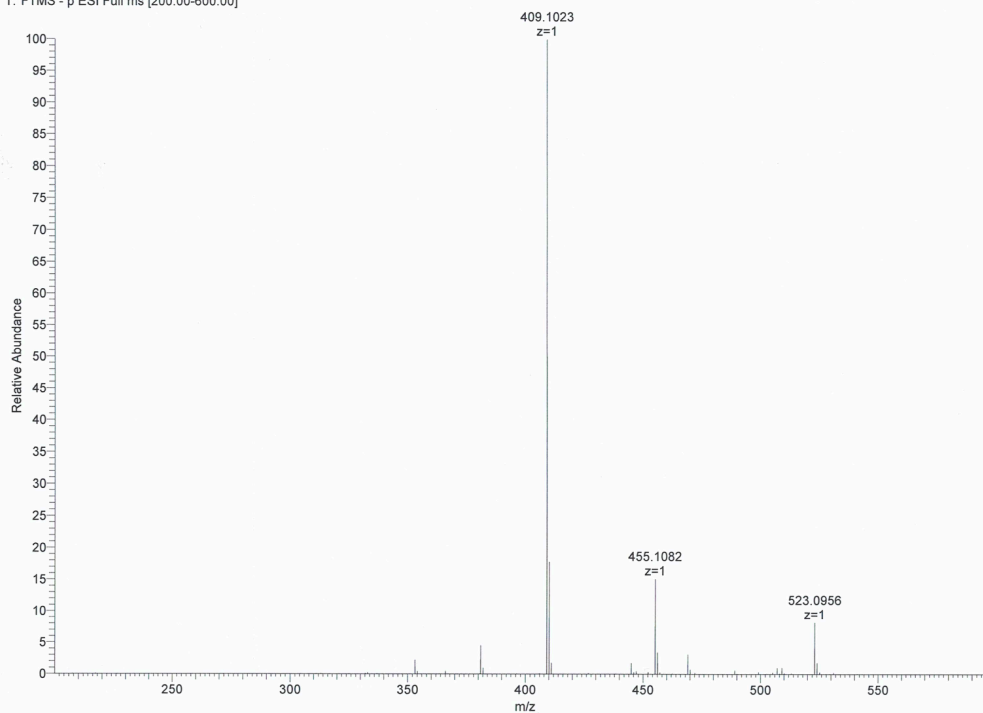

## Compound 6:

C:\XCalibur\LFT18613

1/31/2019 10:40:34 AM

DeFrees/Renslo/UCSF, 1047391L1

LFT18613 #1-68 RT: 0.00-0.99 AV: 68 NL: 3.77E7  
T: FTMS - p ESI Full ms [200.00-600.00]

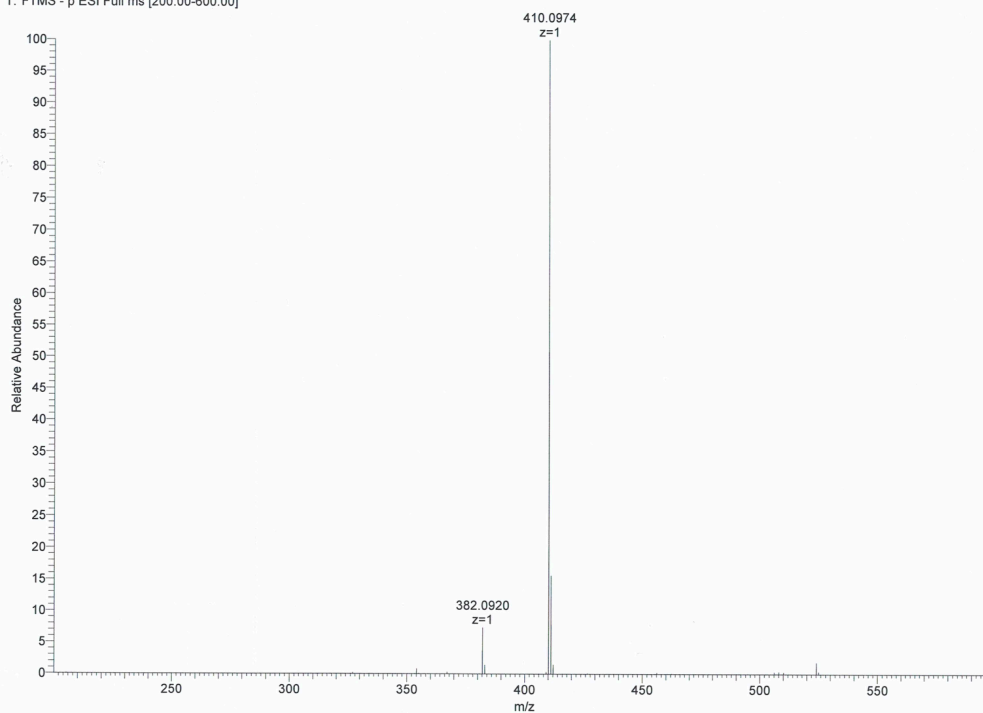

## Compound 7:

C:\XCalibur\...\LFT18615

1/31/2019 10:59:14 AM

DeFrees/Renslo/UCSF, 1047390L1

LFT18615 #1-68 RT: 0.01-1.00 AV: 68 NL: 2.74E7  
T: FTMS - p ESI Full ms [200.00-600.00]

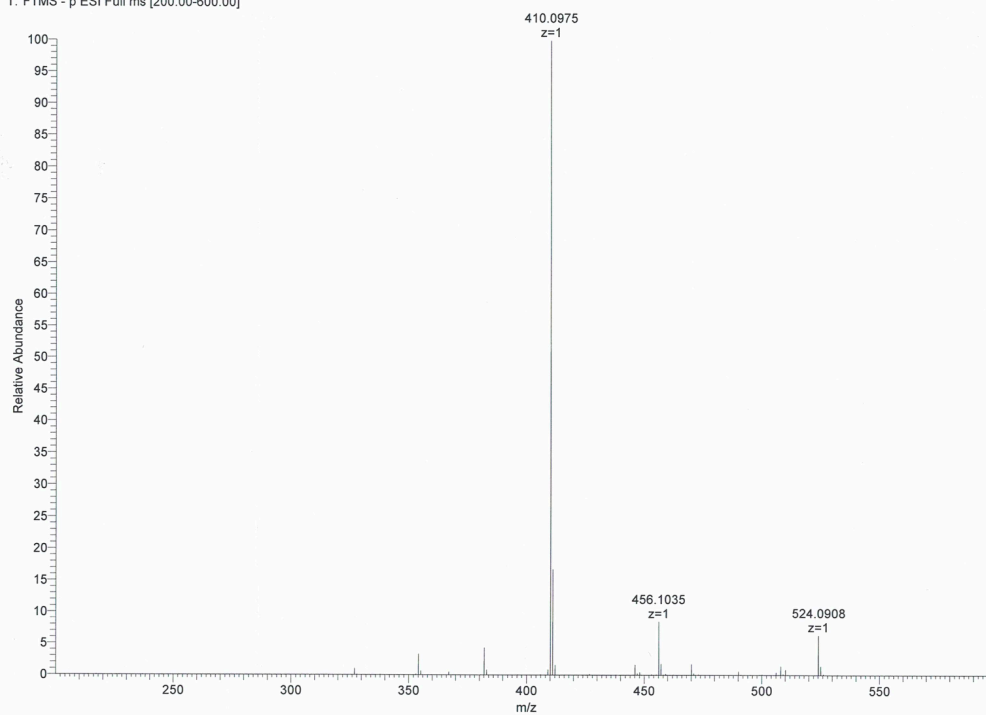

## Compound 8:

C:\XCalibur\...\LFT18617

1/31/2019 11:13:23 AM

DeFrees/Renslo/UCSF, 1047404L1

LFT18617 #1-37 RT: 0.01-0.54 AV: 37 NL: 2.88E7  
T: FTMS - p ESI Full ms [200.00-600.00]

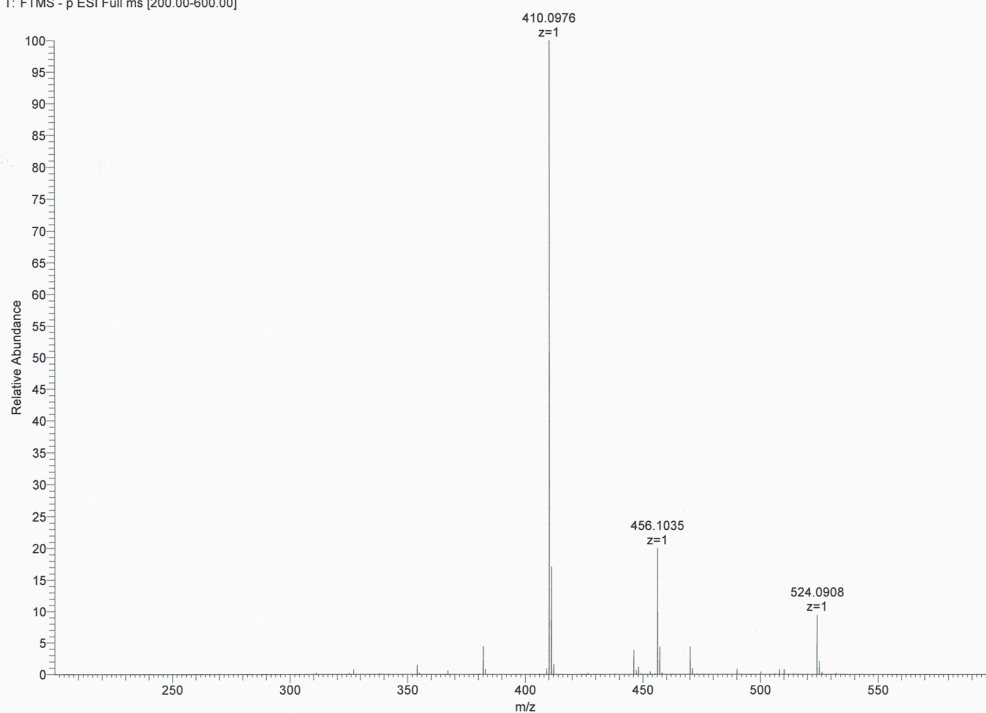



## Compound 9:

C:\XCaliburA...LFT18618

1/31/2019 11:27:39 AM

DeFrees/Renslo/UCSF, 1047407L1

LFT18618 #1-68 RT: 0.00-0.99 AV: 68 NL: 2.25E7  
T: FTMS - p ESI Full ms [200.00-600.00]

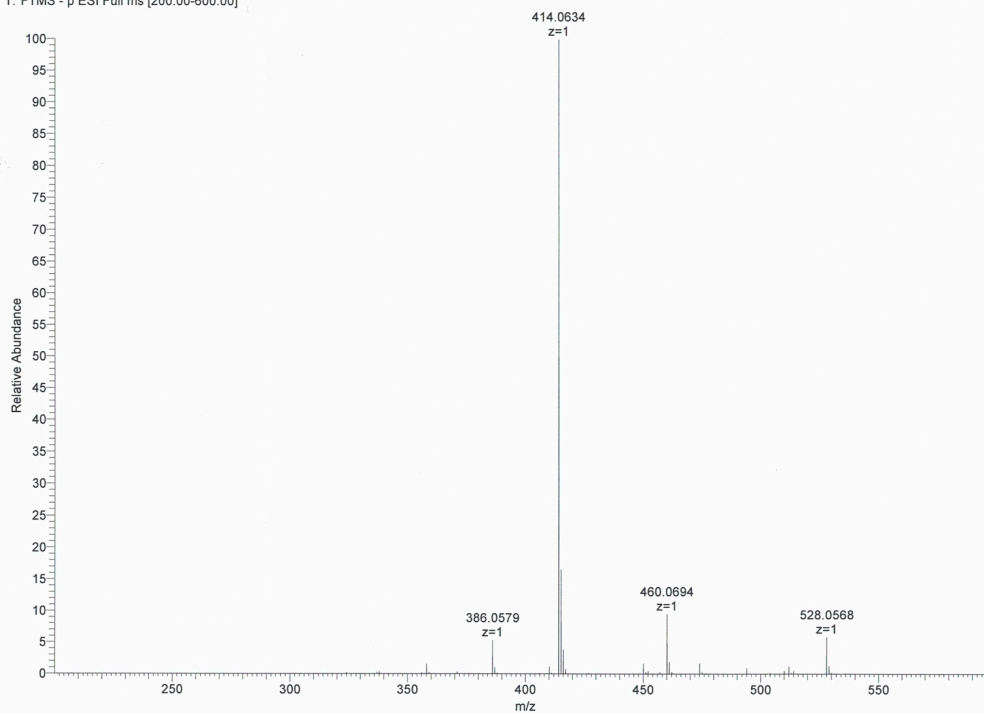

## Compound 10:

C:\XCaliburA...LFT18620

1/31/2019 11:41:40 AM

DeFrees/Renslo/UCSF, 1047406L1

LFT18620 #1-68 RT: 0.00-0.99 AV: 68 NL: 1.98E7  
T: FTMS - p ESI Full ms [200.00-600.00]

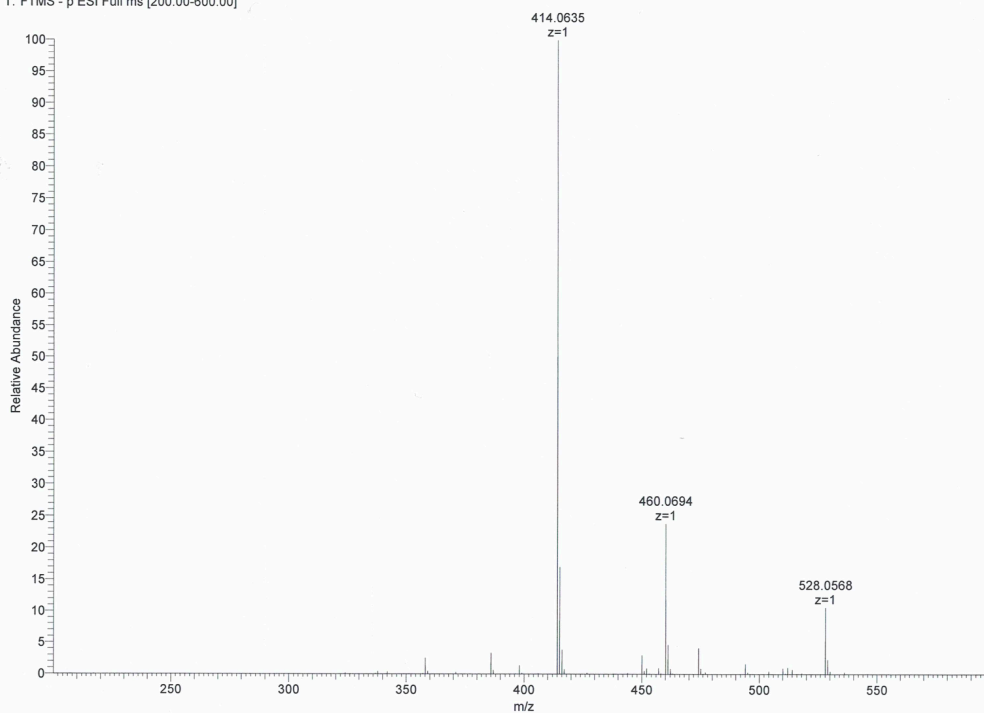

## Compound 11:

C:\XCalibur\LFT18619

1/31/2019 11:35:05 AM

DeFrees/Renslo/UCSF, 1047395L2

LFT18619 #1-68 RT: 0.01-1.00 AV: 68 NL: 2.06E7  
T: FTMS - p ESI Full ms [200.00-600.00]

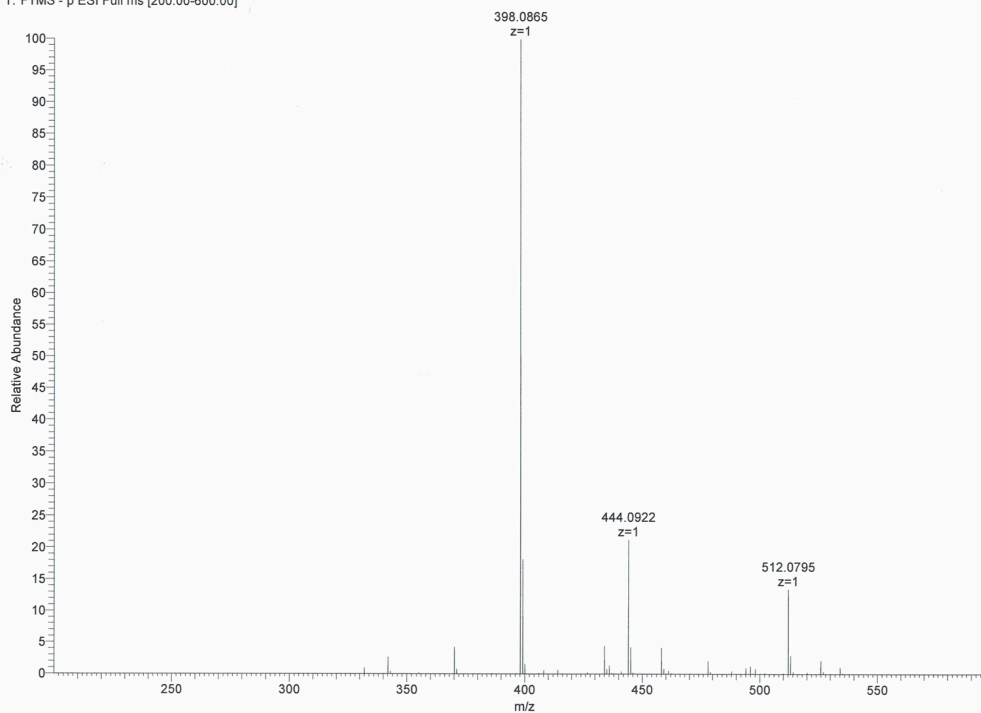

## Compound 12:

C:\XCalibur\LFT18621

1/31/2019 12:26:47 PM

DeFrees/Renslo/UCSF, 1047287L3

LFT18621 #1-68 RT: 0.01-1.00 AV: 68 NL: 2.36E7  
T: FTMS - p ESI Full ms [200.00-600.00]

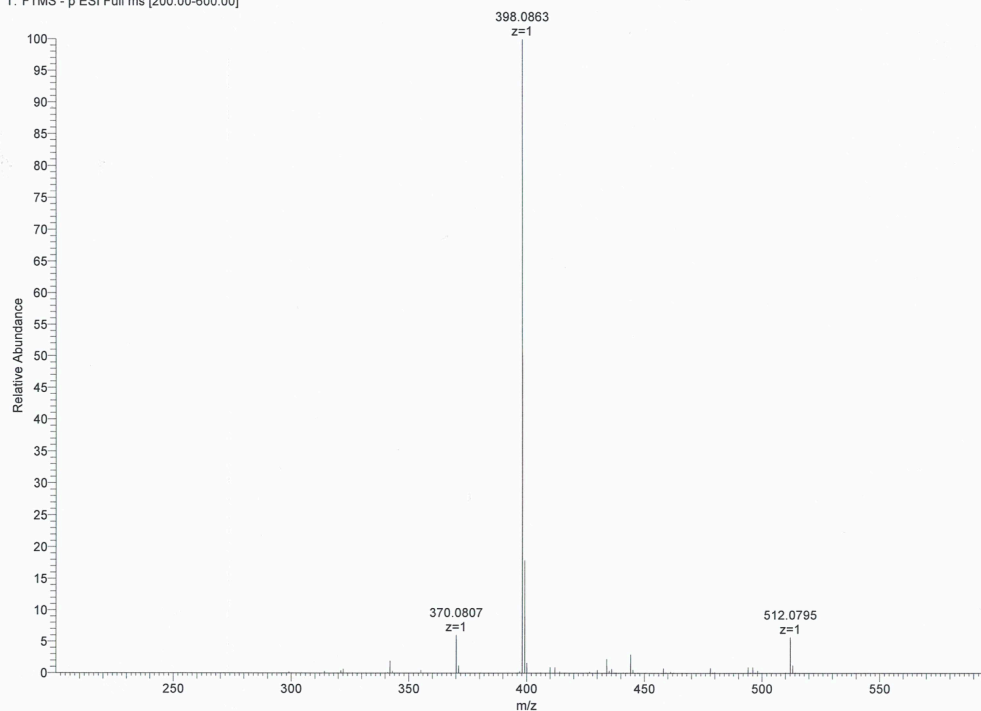

## Compound 13:

C:\XCalibur\...LFT18622

1/31/2019 12:34:46 PM

DeFrees/Rensio/UCSF, 1047414L1

LFT18622 #1-68 RT: 0.01-1.00 AV: 68 NL: 2.12E7  
T: FTMS - p ESI Full ms [200.00-600.00]

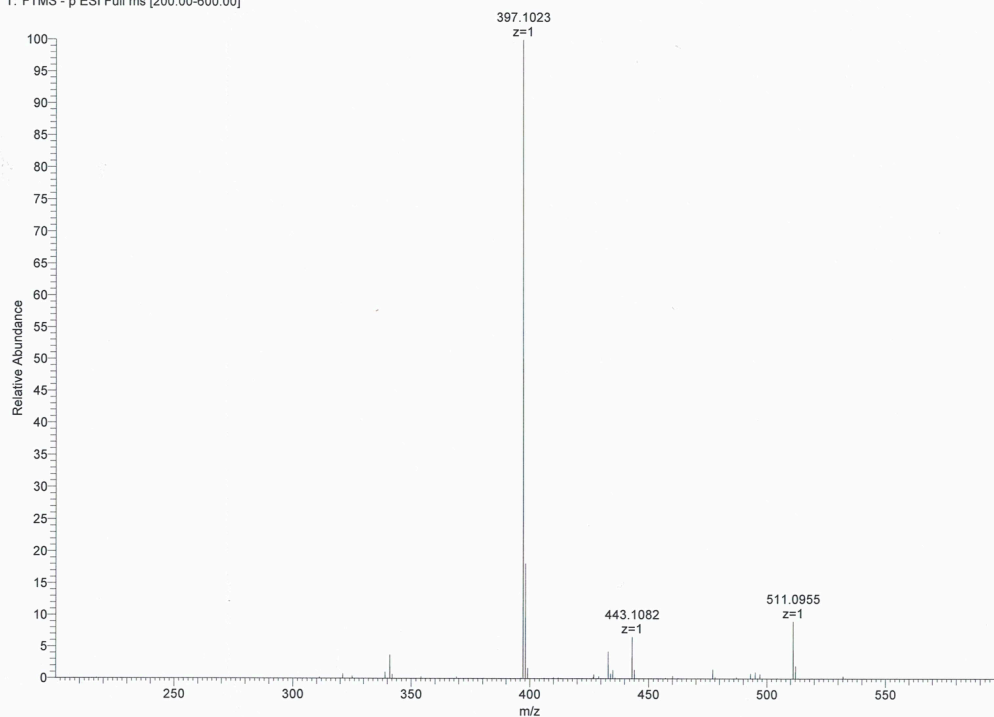

## Compound 14:

C:\XCalibur\...LFT18623

1/31/2019 12:46:11 PM

DeFrees/Rensio/UCSF, 1047282L2

LFT18623 #1-68 RT: 0.01-1.00 AV: 68 NL: 1.71E7  
T: FTMS - p ESI Full ms [200.00-600.00]

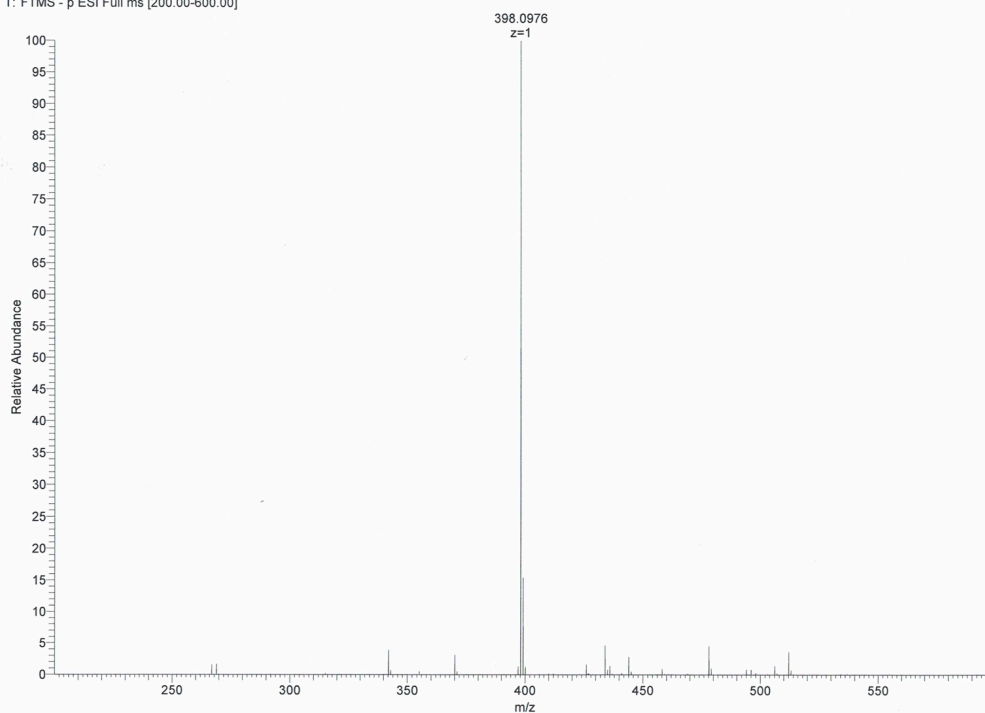

## Compound 15:

C:\XCalibur\...LFT18625

1/31/2019 12:59:39 PM

DeFrees/Renslo/UCSF, 1047281L2

LFT18625 #2.34 RT: 0.02-0.49 AV: 33 NL: 1.37E7  
T: FTMS - p ESI Full ms [200.00-600.00]

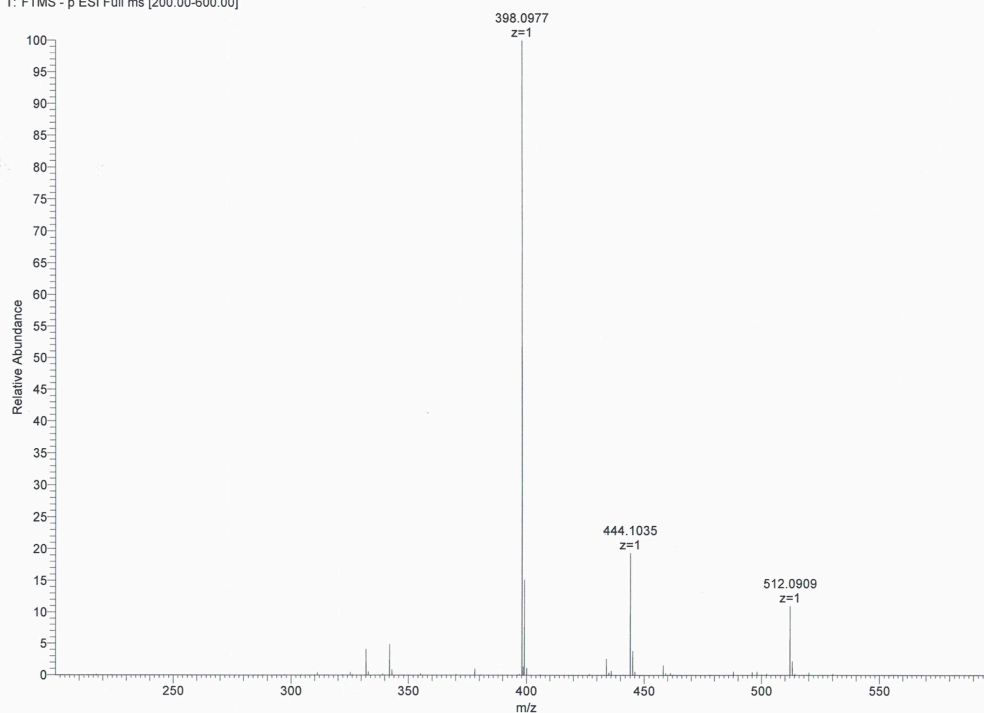

## Compound 16:

C:\XCalibur\...LFT18627

1/31/2019 1:14:14 PM

DeFrees/Renslo/UCSF, 1047392L1

LFT18627 #2.60 RT: 0.02-0.88 AV: 59 NL: 2.78E7  
T: FTMS - p ESI Full ms [200.00-600.00]

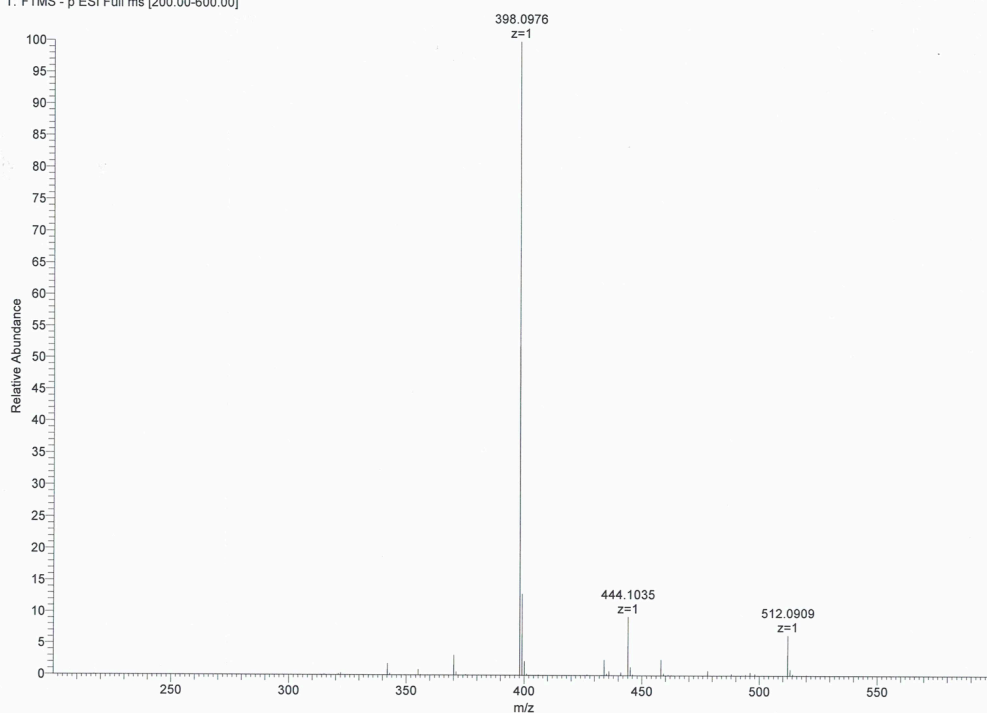

## Compound 17:

C:\XCalibur\...LFT18629

1/31/2019 1:30:02 PM

DeFrees/Renslo/UCSF, 1047412L1

LFT18629 #9-43 RT: 0.21-0.97 AV: 35 NL: 8.29E4  
T: FTMS - p ESI Full ms [200.00-600.00]

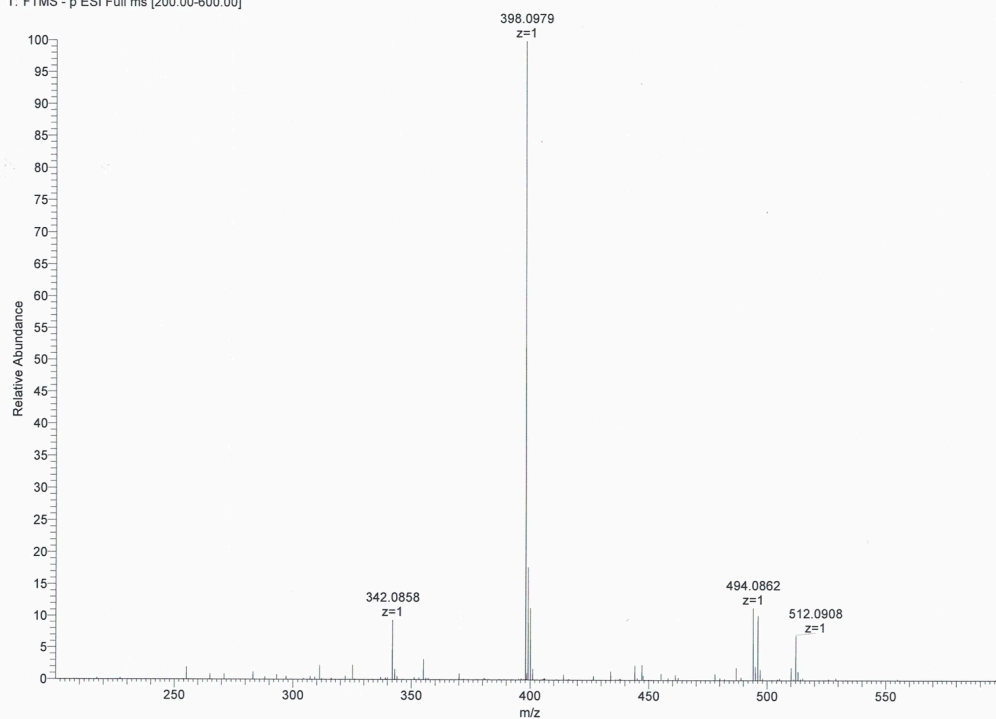

## Compound 18:

C:\XCalibur\...LFT18624

1/31/2019 12:53:12 PM

DeFrees/Renslo/UCSF, 1047413L1

LFT18624 #1-68 RT: 0.01-1.00 AV: 68 NL: 3.62E7  
T: FTMS - p ESI Full ms [200.00-600.00]

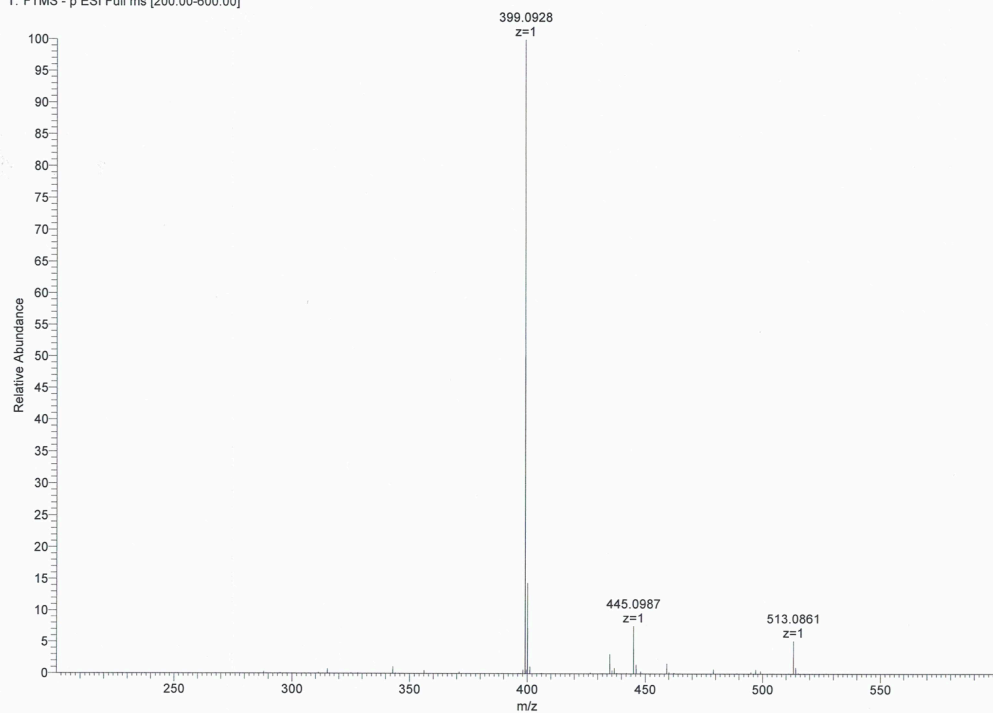

## Compound 19:

C:\XCalibur\LFT18626

1/31/2019 1:08:02 PM

DeFrees/Rensio/UCSF, 1047405L1

LFT18626 #1-57 RT: 0.01-0.99 AV: 57 NL: 5.48E5  
T: FTMS - p ESI Full ms [200.00-600.00]

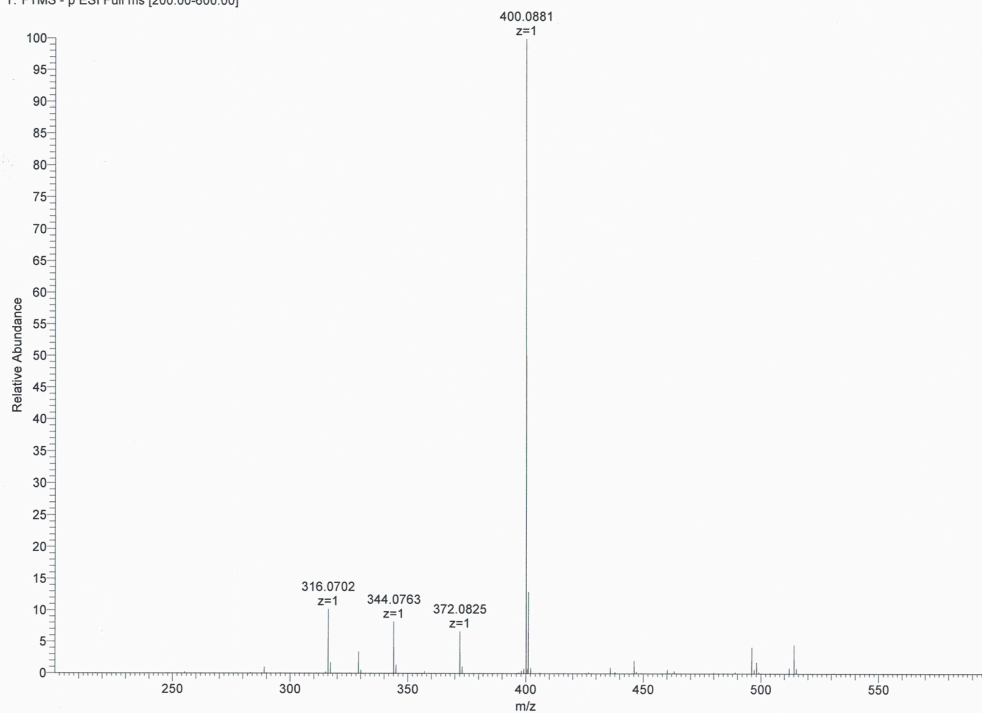

## Compound 20:

C:\XCalibur\LFT18628

1/31/2019 1:22:56 PM

DeFrees/Rensio/UCSF, 1047393L1

LFT18628 #1-55 RT: 0.01-1.00 AV: 55 NL: 2.18E5  
T: FTMS - p ESI Full ms [200.00-600.00]

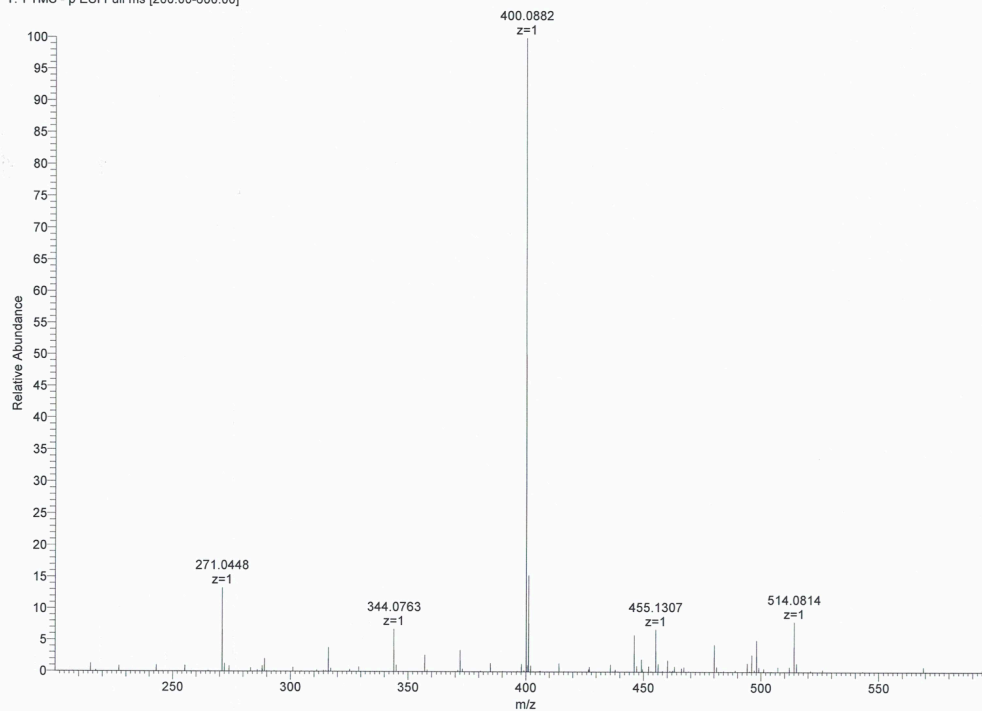

Supplement: c9qo00342h1.pdf [file c9qo00342h1.pdf]
